# Supplementary material
Source: publisher figshare collection journal article supplement (https://acs.figshare.com/ndownloader/files/9686815)
Supplement: Supplementary file 1 [file 9686815]

# SUPPORTING INFORMATION

## Cobalt-Catalyzed Cross-Coupling Reactions of Arylboronic Esters and Aryl Halides

Hung A. Duong,\* Wenqin Wu, Yu-Yuan Teo

Email: [duong\\_hung@ices.a-star.edu.sg](mailto:duong_hung@ices.a-star.edu.sg)

*Organic Chemistry, Institute of Chemical and Engineering Sciences (ICES), Agency for Science, Technology and Research (A\*STAR), 8 Biomedical Grove, Neuros #07-01, Singapore 138665*

**General information.** All reactions were carried out under an argon atmosphere with dry solvents under anhydrous conditions, unless otherwise noted. THF and DMF were dried over alumina under N<sub>2</sub> using a Grubbs-type solvent purification system. Cobalt(II) chloride (97%, Alfa Aesar), cobalt(II) chloride (99.998%, Strem), cobalt(II) acetate (Alfa Aesar), cobalt(II) bromide (99%, Alfa Aesar), cobalt(II) iodide (Alfa Aesar), cobalt(II) acetylacetonate (Sigma Aldrich), cobalt(III) acetylacetonate (Sigma Aldrich), potassium methoxide (Fluka and Sigma Aldrich), aryl bromides and aryl chlorides were purchased from commercial sources and used as received. Terpyridine and arylboronic esters were synthesized according to literature procedures.<sup>1</sup> Reactions were monitored by thin-layer chromatography (TLC), which was performed on 0.25 mm silica gel plates visualized using UV radiation (254 nm). Column chromatography was performed on silica gel (200-300 mesh) by elution with appropriate solvent. GC–MS analysis was performed by using an Agilent HP-7890 instrument with an Agilent HP-5975 with triple-axis detector and HP-5MS capillary column by using helium as the carrier gas. NMR spectra were recorded with a 400 or 600 MHz instrument and were calibrated by using residual nondeuterated solvent (CDCl<sub>3</sub>:  $\delta_{\text{H}}$  = 7.26 ppm;  $\delta_{\text{C}}$  = 77.10 ppm; (CD<sub>3</sub>)<sub>2</sub>CO:  $\delta_{\text{H}}$  = 2.05 ppm;  $\delta_{\text{C}}$  = 29.84 ppm ) as an internal reference. The following abbreviations were used to designate the multiplicities: s = singlet, d = doublet, t = triplet, q = quartet, quin = quintet, m = multiplet, br = broad.

---

(1) (a) Wang, J.; Hanan, G. S. *Synlett* **2005**, 8, 1251. (b) Duong, H. A.; Nguyen, T. M.; Rosman, N. Z.; Tan, L. J. L. *Synthesis* **2014**, 46, 1881.

## Optimizations of the Co-catalyzed of cross-coupling of 1a and 2a:

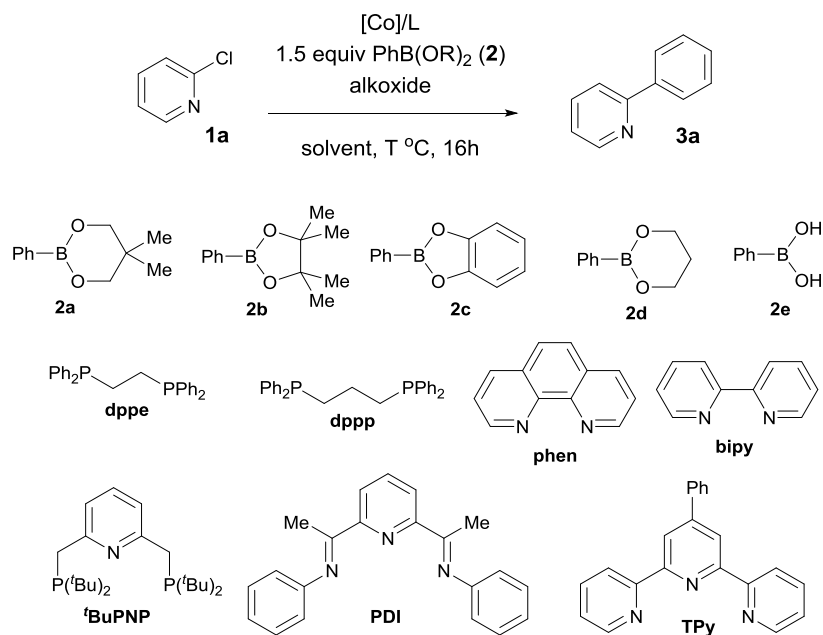

| Entry | 2  | [Co]                         | L                          | Alkoxide                      | Solvent | T (°C) | % conv. <sup>a</sup> | % yield <sup>a</sup> |
|-------|----|------------------------------|----------------------------|-------------------------------|---------|--------|----------------------|----------------------|
| 1     | 2a | 12 mol% CoCl <sub>2</sub>    | none                       | 1.5 equiv KOMe                | THF     | 60     | 61                   | 38                   |
| 2     | 2b | 12 mol% CoCl <sub>2</sub>    | none                       | 1.5 equiv KOMe                | THF     | 60     | 11                   | 0                    |
| 3     | 2c | 12 mol% CoCl <sub>2</sub>    | none                       | 1.5 equiv KOMe                | THF     | 60     | 27                   | 15                   |
| 4     | 2d | 12 mol% CoCl <sub>2</sub>    | none                       | 1.5 equiv KOMe                | THF     | 60     | 45                   | 29                   |
| 5     | 2e | 12 mol% CoCl <sub>2</sub>    | none                       | 1.5 equiv KOMe                | THF     | 60     | 0                    | 0                    |
| 6     | 2a | 12 mol% CoCl <sub>2</sub>    | none                       | 1.5 equiv KOEt                | THF     | 60     | 45                   | 31                   |
| 7     | 2a | 12 mol% CoCl <sub>2</sub>    | none                       | 1.5 equiv KO <sup>t</sup> Bu  | THF     | 60     | 60                   | 10                   |
| 8     | 2a | 12 mol% CoCl <sub>2</sub>    | none                       | 1.5 equiv NaOMe               | THF     | 60     | 60                   | 7                    |
| 9     | 2a | 12 mol% CoCl <sub>2</sub>    | none                       | 1.5 equiv NaO <sup>t</sup> Bu | THF     | 60     | 57                   | 13                   |
| 10    | 2a | 12 mol% CoCl <sub>2</sub>    | none                       | 1.5 equiv LiOMe               | THF     | 60     | 34                   | 9                    |
| 11    | 2a | 12 mol% CoCl <sub>2</sub>    | none                       | 1.5 equiv LiO <sup>i</sup> Pr | THF     | 60     | 38                   | 18                   |
| 12    | 2a | 12 mol% CoCl <sub>2</sub>    | 12 mol% dppp               | 1.5 equiv KOMe                | THF     | 60     | 52                   | 31                   |
| 13    | 2a | 12 mol% CoCl <sub>2</sub>    | 12 mol% dppe               | 1.5 equiv KOMe                | THF     | 60     | 45                   | 22                   |
| 14    | 2a | 12 mol% CoCl <sub>2</sub>    | 12 mol% phen               | 1.5 equiv KOMe                | THF     | 60     | 83                   | 14                   |
| 15    | 2a | 12 mol% CoCl <sub>2</sub>    | 12 mol% bipy               | 1.5 equiv KOMe                | THF     | 60     | 87                   | 41                   |
| 16    | 2a | 12 mol% CoCl <sub>2</sub>    | 12 mol% <sup>t</sup> BuPNP | 1.5 equiv KOMe                | THF     | 60     | 51                   | 31                   |
| 17    | 2a | 12 mol% CoCl <sub>2</sub>    | 12 mol% PDI                | 1.5 equiv KOMe                | THF     | 60     | 16                   | 2                    |
| 18    | 2a | 12 mol% CoCl <sub>2</sub>    | 12 mol% TPy                | 1.5 equiv KOMe                | THF     | 60     | 100                  | 90                   |
| 19    | 2a | 12 mol% CoCl <sub>2</sub>    | 12 mol% TPy                | 1.5 equiv KOMe                | Toluene | 60     | 34                   | 11                   |
| 20    | 2a | 12 mol% CoCl <sub>2</sub>    | 12 mol% TPy                | 1.5 equiv KOMe                | Dioxane | 60     | 11                   | 0                    |
| 21    | 2a | 12 mol% CoCl <sub>2</sub>    | 12 mol% TPy                | 1.5 equiv KOMe                | DMF     | 60     | 100                  | 94                   |
| 22    | 2a | 5 mol% CoCl <sub>2</sub>     | 5 mol% TPy                 | 1.5 equiv KOMe                | THF     | 60     | 50                   | 42                   |
| 23    | 2a | 5 mol% CoCl <sub>2</sub>     | 5 mol% TPy                 | 1.5 equiv KOMe                | DMF     | 60     | 43                   | 38                   |
| 24    | 2a | 5 mol% CoCl <sub>2</sub>     | 5 mol% TPy                 | 1.5 equiv KOMe                | DMF     | 80     | 100                  | 93                   |
| 25    | 2a | 12 mol% CoCl <sub>2</sub>    | 12 mol% TPy                | 0.5 equiv KOMe                | DMF     | 60     | 47                   | 46                   |
| 26    | 2a | 12 mol% Co(OAc) <sub>2</sub> | 12 mol% TPy                | 1.5 equiv KOMe                | DMF     | 60     | 64                   | 62                   |
| 27    | 2a | 12 mol% CoI <sub>2</sub>     | 12 mol% TPy                | 1.5 equiv KOMe                | DMF     | 60     | 65                   | 59                   |

|                 |           |                               |             |                 |     |    |     |    |
|-----------------|-----------|-------------------------------|-------------|-----------------|-----|----|-----|----|
| 28              | <b>2a</b> | 12 mol% CoBr <sub>2</sub>     | 12 mol% TPy | 1.5 equiv KOMe  | DMF | 60 | 100 | 92 |
| 29              | <b>2a</b> | 12 mol% Co(acac) <sub>2</sub> | 12 mol% TPy | 1.5 equiv KOMe  | DMF | 60 | 47  | 38 |
| 30              | <b>2a</b> | 12 mol% Co(acac) <sub>3</sub> | 12 mol% TPy | 1.5 equiv KOMe  | DMF | 60 | 3   | 0  |
| 31 <sup>b</sup> | <b>2a</b> | 12 mol% CoCl <sub>2</sub>     | 12 mol% TPy | 1.5 equiv KOMe  | DMF | 60 | 100 | 94 |
| 32              | <b>2a</b> | none                          | 12 mol% TPy | 1.5 equiv KOMe  | DMF | 60 | 16  | 0  |
| 33              | <b>2a</b> | 12 mol% PdCl <sub>2</sub>     | 12 mol% TPy | 1.5 equiv KOMe  | DMF | 60 | 80  | 12 |
| 34              | <b>2a</b> | 12 mol% NiCl <sub>2</sub>     | 12 mol% TPy | 1.5 equiv KOMe  | DMF | 60 | 15  | 8  |
| 35              | <b>2a</b> | 12 mol% CuCl                  | 12 mol% TPy | 1.5 equiv KOMe  | DMF | 60 | 9   | 0  |
| 36              | <b>2a</b> | 12 mol% FeCl <sub>2</sub>     | 12 mol% TPy | 1.5 equiv KOMe  | DMF | 60 | 0   | 0  |
| 37              | <b>2b</b> | 12 mol% CoCl <sub>2</sub>     | 12 mol% TPy | 1.5 equiv KOMe  | DMF | 60 | 52  | 40 |
| 38              | <b>2e</b> | 12 mol% CoCl <sub>2</sub>     | 12 mol% TPy | 1.5 equiv KOMe  | DMF | 60 | 85  | 75 |
| 39              | <b>2e</b> | 12 mol% CoCl <sub>2</sub>     | 12 mol% TPy | 1.5 equiv KOtBu | DMF | 60 | 8   | 7  |
| 40              | <b>2e</b> | 12 mol% CoCl <sub>2</sub>     | 12 mol% TPy | 1.5 equiv KOEt  | DMF | 60 | 100 | 92 |

<sup>a</sup> Determined by GC using dodecane as an internal standard. <sup>b</sup> CoCl<sub>2</sub> (99.998%) was employed.

### General Procedure for Cobalt-catalyzed Suzuki Cross-coupling Reaction of Aryl Chlorides and Bromides:

In a glovebox, CoCl<sub>2</sub> (3.2mg, 0.025 mmol, 5 mol%), TP (7.7mg, 0.025 mmol, 5 mol%), KOMe (52.6mg, 0.75 mmol, 1.5 eq) were charged to a dried reaction tube. 0.5ml DMF was added. The mixture was allowed to stir at rt for 5 min before a solution of aryl halide (0.5 mmol, 1.0 eq) and arylboronic ester (0.75 mmol, 1.5 eq) in 0.5 ml DMF was added. The tube was sealed, taken out of the glovebox and stirred at 80 °C for 16h. The reaction progress was monitored by GC using dodecane as the internal standard. Once the reaction was completed, the reaction mixture was quenched with water and extracted with ethyl acetate several times. The combined organic layers were dried over anhydrous Na<sub>2</sub>SO<sub>4</sub>, concentrated in vacuo and the resulting crude mixture was purified by silica gel column chromatography.

#### 2-Phenylpyridine (**3a**)<sup>2</sup>

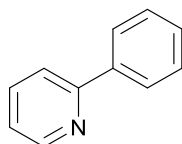

**3a** was prepared from 2-chloropyridine (57 mg, 0.5 mmol) and PhB(neo) (143 mg, 0.75 mmol, 1.5 eq). The crude mixture was purified by flash column chromatography (1-10% of Et<sub>2</sub>O /petroleum ether) to afford the desired product as a colourless oil (71 mg, 91%).

(2) Liu, K. M.; Liao, L. Y.; Duan, X. F. *Chem. Comm.* **2015**, 51, 1124.

**3a** was prepared from 2-bromopyridine (79 mg, 0.5 mmol) and PhB(neo) (143 mg, 0.75 mmol, 1.5 eq). The crude mixture was purified by flash column chromatography (1-10% of Et<sub>2</sub>O /petroleum ether) to afford the desired product as a colourless oil (67 mg, 86%).

<sup>1</sup>H NMR (400 MHz, CDCl<sub>3</sub>) δ 8.70 (dt, *J* = 4.9, 1.4 Hz, 1H), 8.08 – 7.97 (m, 2H), 7.76 – 7.69 (m, 2H), 7.53 – 7.45 (m, 2H), 7.45 – 7.39 (m, 1H), 7.21 (td, *J* = 5.2, 3.0 Hz, 1H). <sup>13</sup>C{<sup>1</sup>H} NMR (101 MHz, CDCl<sub>3</sub>) δ 157.4, 149.6, 139.3, 136.8, 129.0, 128.7, 126.9, 122.1, 120.6.

2-(4-Methoxyphenyl)pyridine (**3b**)<sup>2</sup>

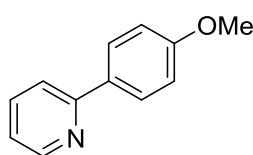

**3b** was prepared from 2-chloropyridine (57 mg, 0.5 mmol) and 2-(4-methoxyphenyl)-5,5-dimethyl-1,3,2-dioxaborinane (165 mg, 0.75 mmol, 1.5 eq). The crude mixture was purified by flash column chromatography (5-10% of Et<sub>2</sub>O /petroleum ether) to afford the desired product as a white solid (78 mg, 84%). <sup>1</sup>H NMR (400 MHz, CDCl<sub>3</sub>) δ 8.63 (dd, *J* = 4.8, 0.7 Hz, 1H), 7.99 – 7.91 (m, 2H), 7.70 – 7.59 (m, 2H), 7.12 (ddd, *J* = 6.7, 4.8, 1.9 Hz, 1H), 7.01 – 6.94 (m, 2H), 3.81 (s, 3H). <sup>13</sup>C{<sup>1</sup>H} NMR (101 MHz, CDCl<sub>3</sub>) δ 160.4, 157.0, 149.4, 136.6, 131.9, 128.1, 121.3, 119.7, 114.0, 55.2.

2-(4-(Trifluoromethyl)phenyl)pyridine (**3c**)<sup>3</sup>

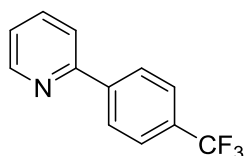

**3c** was prepared from 2-chloropyridine (57 mg, 0.5 mmol) and 5,5-dimethyl-2-(4-(trifluoromethyl)phenyl)-1,3,2-dioxaborinane (194 mg, 0.75 mmol, 1.5 eq). The crude mixture was purified by flash column chromatography (3-5% Et<sub>2</sub>O with 1% TEA/pentane) to afford the desired product as a colourless oil (101 mg, 90%). <sup>1</sup>H NMR (400 MHz, CDCl<sub>3</sub>) δ 8.73 (ddd, *J* = 4.8, 1.8, 1.0 Hz, 1H), 8.15 – 8.09 (m, 2H), 7.84 – 7.75 (m, 2H), 7.75 – 7.71 (m, 2H),

(3) Martinez-Solorio, D.; Melillo, B.; Sanchez, L.; Liang, Y.; Lam, E.; Smith, A. B. *J. Am. Chem. Soc.* **2016**, *138*, 1836.

7.30 (ddd,  $J = 7.0, 4.8, 1.6$  Hz, 1H).  $^{13}\text{C}\{^1\text{H}\}$  NMR (101 MHz,  $\text{CDCl}_3$ )  $\delta$  155.8, 149.9, 142.7, 137.0, 130.8 (q,  $J = 33.3$  Hz), 127.2, 125.7 (q,  $J = 4.0$  Hz), 124.3 (q,  $J = 273.7$  Hz), 123.0, 120.9.

#### 4-(Pyridin-2-yl)benzonitrile (**3d**)<sup>4</sup>

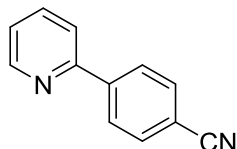

**3d** was prepared from 2-chloropyridine (57 mg, 0.5 mmol) and 4-(5,5-dimethyl-1,3,2-dioxaborinan-2-yl)benzonitrile (161 mg, 0.75 mmol, 1.5 eq). The crude mixture was purified by flash column chromatography (3-30%  $\text{Et}_2\text{O}$  with 1% TEA/pentane) to afford the desired product as a white solid (57 mg, 63%).  $^1\text{H}$  NMR (400 MHz,  $(\text{CD}_3)_2\text{CO}$ )  $\delta$  8.76 – 8.70 (m, 1H), 8.38 – 8.30 (m, 2H), 8.06 (dd,  $J = 8.0, 1.1$  Hz, 1H), 8.00 – 7.85 (m, 3H), 7.43 (dd,  $J = 7.6, 4.7$  Hz, 1H).  $^{13}\text{C}\{^1\text{H}\}$  NMR (101 MHz,  $(\text{CD}_3)_2\text{CO}$ )  $\delta$  155.5, 150.8, 144.2, 138.1, 133.4, 128.3, 124.4, 121.7, 119.3, 113.2.

#### 2-(*o*-Tolyl)pyridine (**3e**)<sup>5</sup>

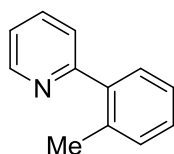

**3e** was prepared from 2-chloropyridine (57 mg, 0.5 mmol) and 5,5-dimethyl-2-(*o*-tolyl)-1,3,2-dioxaborinane (153 mg, 0.75 mmol, 1.5 eq). The crude mixture was purified by flash column chromatography (3%  $\text{Et}_2\text{O}$  with 1% TEA/pentane) to afford the desired product as a colourless oil (66 mg, 78%).  $^1\text{H}$  NMR (400 MHz,  $\text{CDCl}_3$ )  $\delta$  8.70 (ddd,  $J = 4.9, 1.9, 0.9$  Hz, 1H), 7.75 (td,  $J = 7.7, 1.9$  Hz, 1H), 7.40 (ddd,  $J = 7.9, 2.2, 1.3$  Hz, 2H), 7.33 – 7.22 (m, 4H), 2.37 (s, 3H).  $^{13}\text{C}\{^1\text{H}\}$  NMR (101 MHz,  $\text{CDCl}_3$ )  $\delta$  160.0, 149.1, 140.4, 136.2, 135.7, 130.7, 129.6, 128.3, 125.9, 124.1, 121.6, 20.3.

#### 2-(Naphthalen-1-yl)pyridine (**3f**)<sup>6</sup>

(4) Kan, J.; Huang, S.; Lin, J.; Zhang, M.; Su, W.; *Angew. Chem. Int. Ed.* **2015**, 54, 2199.

(5) Laha, J. K.; Jethava, K. P.; Patel, S.; Patel, K. V. *J. Org. Chem.* **2017**, 82, 76.

(6) Zhu, F.; Wang, Z-X. *J. Org. Chem.* **2014**, 79, 4285.

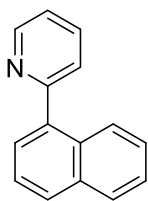

**3f** was prepared from 2-chloropyridine (57 mg, 0.5 mmol) and 5,5-dimethyl-2-(naphthalen-1-yl)-1,3,2-dioxaborinane (180 mg, 1.5 eq). The crude mixture was purified by flash column chromatography (5% Et<sub>2</sub>O with 1% TEA/pentane) to afford the desired product as a yellow oil (98 mg, 95%). <sup>1</sup>H NMR (400 MHz, CDCl<sub>3</sub>) δ 8.82 (ddd, *J* = 5.0, 1.9, 1.0 Hz, 1H), 8.12 (dd, *J* = 8.2, 1.6 Hz, 1H), 7.98 – 7.88 (m, 2H), 7.79 (dd, *J* = 7.7, 1.9 Hz, 1H), 7.67 – 7.44 (m, 5H), 7.32 (ddd, *J* = 7.6, 4.9, 1.2 Hz, 1H). <sup>13</sup>C{<sup>1</sup>H} NMR (101 MHz, CDCl<sub>3</sub>) δ 159.1, 149.3, 138.3, 136.3, 133.8, 131.0, 128.8, 128.2, 127.4, 126.4, 125.7, 125.5, 125.2, 124.9, 121.9.

#### 2-(Thiophen-2-yl)pyridine (**3g**)<sup>7</sup>

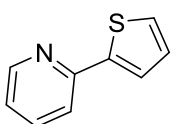

**3g** was prepared from 2-chloropyridine (28 mg, 0.25 mmol) and 5,5-dimethyl-2-(thiophen-2-yl)-1,3,2-dioxaborinane (74 mg, 0.375 mmol, 1.5 eq). The crude mixture was purified by flash column chromatography (15% Et<sub>2</sub>O with 1% TEA/petroleum ether) to afford the desired product as yellow oil (30 mg, 75%). 0.25 mmol scale 0.25 mmol <sup>1</sup>H NMR (400 MHz, (CD<sub>3</sub>)<sub>2</sub>CO) δ 8.55 – 8.47 (m, 1H), 7.88 – 7.76 (m, 2H), 7.73 (dd, *J* = 3.7, 1.1 Hz, 1H), 7.54 (dt, *J* = 5.1, 1.1 Hz, 1H), 7.23 (ddd, *J* = 7.2, 4.8, 1.2 Hz, 1H), 7.14 (ddd, *J* = 4.8, 3.6, 0.9 Hz, 1H). <sup>13</sup>C{<sup>1</sup>H} NMR (101 MHz, (CD<sub>3</sub>)<sub>2</sub>CO) δ 153.4, 150.3, 146.0, 137.6, 128.9, 128.6, 125.5, 122.9, 119.3.

#### 2-(furan-2-yl)pyridine (**3h**)<sup>6</sup>

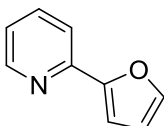

(7) Luzung, M. R.; Patel, J. S.; Yin, J. *J. Org. Chem.* **2010**, 75, 8330.

**3h** was prepared from 2-chloropyridine (28 mg, 0.25 mmol) and 2-(furan-2-yl)-5,5-dimethyl-1,3,2-dioxaborinane (68 mg, 0.375 mmol, 1.5 eq). The crude mixture was purified by flash column chromatography (15-20% of Et<sub>2</sub>O with 1% TEA /petroleum ether) to afford the desired product as a colourless oil (33mg, 46%). <sup>1</sup>H NMR (400 MHz, (CD<sub>3</sub>)<sub>2</sub>CO) δ 8.56 (ddd, *J* = 4.8, 1.8, 0.9 Hz, 1H), 7.83 (td, *J* = 7.8, 1.8 Hz, 1H), 7.76 – 7.66 (m, 2H), 7.24 (ddt, *J* = 6.9, 4.7, 1.0 Hz, 1H), 7.08 (dd, *J* = 3.4, 0.9 Hz, 1H), 6.60 (dd, *J* = 3.4, 1.8 Hz, 1H). <sup>13</sup>C{<sup>1</sup>H} NMR (101 MHz, (CD<sub>3</sub>)<sub>2</sub>CO) δ 154.9, 150.5, 150.2, 144.4, 137.6, 122.9, 118.8, 112.9, 109.3.

### 3-Bromo-2-phenylpyridine (**3i**)<sup>8</sup>

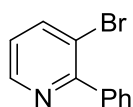

**3i** was prepared from 3-bromo-2-chloropyridine (96 mg, 0.5 mmol) and PhB(neo) (143 mg, 0.75 mmol, 1.5 eq). The crude mixture was purified by flash column chromatography (2% acetone /petroleum ether) to afford the desired product as a colourless oil (74 mg, 63%) together with an impure mixture of 2-phenylpyridine **3a** (11 mg, ca. 14%).

<sup>1</sup>H NMR (400 MHz, CDCl<sub>3</sub>) δ 8.63 (dd, *J* = 4.6, 1.5 Hz, 1H), 8.00 (dd, *J* = 8.1, 1.5 Hz, 1H), 7.72 – 7.64 (m, 2H), 7.52 – 7.38 (m, 3H), 7.15 (dd, *J* = 8.0, 4.6 Hz, 1H). <sup>13</sup>C{<sup>1</sup>H} NMR (101 MHz, CDCl<sub>3</sub>) δ 158.2, 148.0, 141.3, 139.5, 129.3, 128.8, 128.0, 123.2, 119.8.

### 2-Methyl-6-phenylpyridine (**3j**)<sup>9</sup>

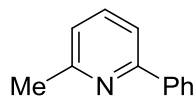

**3j** was prepared from 2-chloro-6-methylpyridine (64 mg, 0.5 mmol) and PhB(neo) (143 mg, 0.75 mmol, 1.5 eq). The crude mixture was purified by flash column chromatography (5% Et<sub>2</sub>O with 1% TEA/petroleum ether) to afford the desired product as a colourless oil (65 mg, 77%). <sup>1</sup>H NMR (400 MHz, CDCl<sub>3</sub>) δ 8.01 – 7.94 (m, 2H), 7.64 (t, *J* = 7.7 Hz, 1H), 7.52 (dt, *J*

(8) Zhou, Q.; Zhang, B.; Su, L.; Jiang, T.; Chen, R.; Du, T.; Ye, Y.; Shen, J.; Dai, G.; Han, D.; Jiang, H. *Tetrahedron* **2013**, 69, 10996.

(9) Yuen, O. Y.; So, C. M.; Man, H. W.; Kwong, F. Y., *Chem. Eur. J.* **2016**, 22, 6471.

= 7.8, 0.8 Hz, 1H), 7.50 – 7.44 (m, 2H), 7.43 – 7.36 (m, 1H), 7.10 (d,  $J$  = 7.6 Hz, 1H), 2.64 (s, 3H).  $^{13}\text{C}\{^1\text{H}\}$  NMR (101 MHz,  $\text{CDCl}_3$ )  $\delta$  158.4, 157.0, 139.8, 136.9, 128.7, 128.7, 127.0, 121.6, 117.6, 24.8.

#### 2-Methoxy-6-phenylpyridine (**3k**)<sup>10</sup>

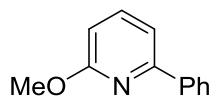

**3k** was prepared from 2-bromo-6-methoxypyridine (94 mg, 0.5 mmol) and PhB(neo) (143 mg, 0.75 mmol, 1.5 eq). The crude mixture was purified by flash column chromatography (5%  $\text{Et}_2\text{O}$  with 0.5% TEA/petroleum ether) to afford the desired product as a colourless oil (75 mg, 81%).  $^1\text{H}$  NMR (400 MHz,  $\text{CDCl}_3$ )  $\delta$  8.07 (d,  $J$  = 1.6 Hz, 1H), 8.05 (t,  $J$  = 1.4 Hz, 1H), 7.64 (dd,  $J$  = 8.2, 7.4 Hz, 1H), 7.50 – 7.44 (m, 2H), 7.43 – 7.37 (m, 1H), 7.35 (dd,  $J$  = 7.5, 0.7 Hz, 1H), 6.70 (dd,  $J$  = 8.2, 0.7 Hz, 1H), 4.05 (s, 3H).  $^{13}\text{C}\{^1\text{H}\}$  NMR (101 MHz,  $\text{CDCl}_3$ )  $\delta$  163.8, 154.7, 139.2, 139.1, 128.9, 128.6, 126.7, 112.8, 109.3, 53.2.

#### 4-Methyl-2-phenylpyridine (**3l**)<sup>11</sup>

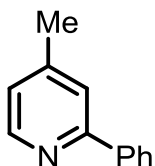

**3l** was prepared from 2-bromo-4-methylpyridine (86 mg, 0.5 mmol) and PhB(neo) (143 mg, 0.75 mmol, 1.5 eq). The crude mixture was purified by flash column chromatography (5%  $\text{Et}_2\text{O}$  with 1% TEA/pentane) to afford the desired product as a white solid (72 mg, 85%).  $^1\text{H}$  NMR (400 MHz,  $\text{CDCl}_3$ )  $\delta$  8.55 (dd,  $J$  = 5.0, 0.8 Hz, 1H), 8.02 – 7.94 (m, 2H), 7.54 (dq,  $J$  = 1.6, 0.8 Hz, 1H), 7.50 – 7.44 (m, 2H), 7.43 – 7.37 (m, 1H), 7.04 (ddt,  $J$  = 5.0, 1.4, 0.7 Hz, 1H), 2.40 (d,  $J$  = 0.8 Hz, 3H).  $^{13}\text{C}\{^1\text{H}\}$  NMR (101 MHz,  $\text{CDCl}_3$ )  $\delta$  157.3, 149.4, 147.8, 139.5, 128.8, 128.7, 126.9, 123.1, 121.6, 21.2.

#### Methyl 6-phenylnicotinate (**3m**)<sup>3</sup>

(10) Wang, X.; He, Y.; Ren, M.; Liu, S.; Liu, H.; Huang, G. *J. Org. Chem.* **2016**, *81*, 7958.

(11) Chen, M.; Micalizio, G. C.; *J. Am. Chem. Soc.* **2012**, *134*, 1352.



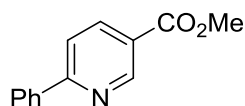

**3m** was prepared from methyl 6-chloronicotinate (86 mg, 0.5 mmol) and PhB(neo) (143 mg, 0.75 mmol, 1.5 eq). The crude mixture was purified by flash column chromatography (15% Et<sub>2</sub>O with 1% TEA/petroleum ether) to afford the desired product as white solid (71 mg, 67%). <sup>1</sup>H NMR (400 MHz, (CD<sub>3</sub>)<sub>2</sub>CO) δ 9.20 (dd, *J* = 2.3, 0.9 Hz, 1H), 8.38 (dd, *J* = 8.3, 2.2 Hz, 1H), 8.25 – 8.18 (m, 2H), 8.09 (dd, *J* = 8.3, 0.9 Hz, 1H), 7.59 – 7.46 (m, 3H), 3.95 (s, 3H). <sup>13</sup>C{<sup>1</sup>H} NMR (101 MHz, (CD<sub>3</sub>)<sub>2</sub>CO) δ 166.1, 161.2, 151.3, 139.0, 138.6, 130.8, 129.7, 128.1, 125.3, 120.6, 52.6.

#### 2-Phenyl-4-(trifluoromethyl)pyridine (**3n**)<sup>12</sup>

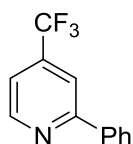

**3n** was prepared from 2-bromo-4-(trifluoromethyl)pyridine (113 mg, 0.5 mmol) and PhB(neo) (143 mg, 0.75 mmol, 1.5 eq). The crude mixture was purified by flash column chromatography (5% Et<sub>2</sub>O with 1% TEA/petroleum ether) to afford the desired product as a colorless oil (86 mg, 77%). <sup>1</sup>H NMR (400 MHz, CDCl<sub>3</sub>) δ 8.87 (dt, *J* = 5.0, 0.8 Hz, 1H), 8.07 – 8.00 (m, 2H), 7.93 (dq, *J* = 1.6, 0.8 Hz, 1H), 7.56 – 7.41 (m, 4H). <sup>13</sup>C NMR (101 MHz, CDCl<sub>3</sub>) δ 158.8, 150.7, 139.2 (q, *J* = 33.1 Hz), 138.1, 129.9, 129.0, 127.1, 123.0 (q, *J* = 273.7 Hz), 117.6 (q, *J* = 3.0 Hz), 116.1 (q, *J* = 4.0 Hz).

#### 2-Phenyl-3-(trifluoromethyl)pyridine (**3o**)<sup>13</sup>

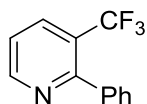

**3o** was prepared from 2-bromo-3-(trifluoromethyl)pyridine (113 mg, 0.5 mmol) and PhB(neo) (143 mg, 0.75 mmol, 1.5 eq). The crude mixture was purified by flash column chromatography (5% Et<sub>2</sub>O with 0.5% TEA/petroleum ether) to afford the desired product as a colourless oil (67 mg, 60%). <sup>1</sup>H NMR (400 MHz, CDCl<sub>3</sub>) δ 8.85 (ddd, *J* = 4.7, 1.7, 0.8 Hz,

(12) Rosner, S.; Buchwald, S. L. *Angew. Chem. Int. Ed.* **2016**, 55, 10463.

(13) Lin, X.; Hou, C.; Li, H.; Weng, Z. *Chem. Eur. J.* **2016**, 22, 2075.

1H), 8.09 (dd,  $J = 8.0, 1.7$  Hz, 1H), 7.58 – 7.36 (m, 6H).  $^{13}\text{C}\{^1\text{H}\}$  NMR (101 MHz,  $\text{CDCl}_3$ )  $\delta$  158.5, 151.8, 139.1, 135.0 (q,  $J = 5.1$  Hz), 128.9, 128.7 (q,  $J = 1.0$  Hz), 128.1, 125.1 (q,  $J = 18.2$  Hz), 122.3 (q,  $J = 274.7$  Hz), 121.8.

### 2-Phenylquinoline (**3p**)<sup>9</sup>

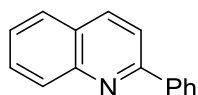

**3p** was prepared from 2-chloroquinoline (82 mg, 0.5 mmol) and PhB(neo) (143 mg, 0.75 mmol, 1.5 eq). The crude mixture was purified by flash column chromatography (2-10%  $\text{Et}_2\text{O}$ /pentane) to afford the desired product as a colorless oil (83 mg, 81%)  $^1\text{H}$  NMR (400 MHz,  $\text{CDCl}_3$ )  $\delta$  8.25 – 8.15 (m, 4H), 7.92 – 7.79 (m, 2H), 7.74 (s, 1H), 7.60 – 7.44 (m, 4H).  $^{13}\text{C}\{^1\text{H}\}$  NMR (101 MHz,  $\text{CDCl}_3$ )  $\delta$  157.4, 148.3, 139.7, 136.8, 129.7, 129.7, 129.4, 128.9, 127.6, 127.5, 127.2, 126.3, 119.0.

### 4-Methyl-2-phenylpyrimidine (**3q**)<sup>14</sup>

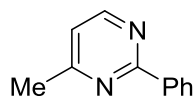

**3q** was prepared from 2-chloro-4-methylpyrimidine (64 mg, 0.5 mmol) and PhB(neo) (143 mg, 0.75 mmol, 1.5 eq). The crude mixture was purified by flash column chromatography (5%  $\text{Et}_2\text{O}$  with 0.5% TEA/petroleum ether) to afford the desired product as a colourless oil (60 mg, 70%).  $^1\text{H}$  NMR (400 MHz,  $\text{CDCl}_3$ )  $\delta$  8.65 (d,  $J = 5.1$  Hz, 1H), 8.48 – 8.40 (m, 2H), 7.52 – 7.44 (m, 3H), 7.05 (d,  $J = 5.0$  Hz, 1H), 2.59 (s, 3H).  $^{13}\text{C}\{^1\text{H}\}$  NMR (101 MHz,  $\text{CDCl}_3$ )  $\delta$  167.3, 164.3, 156.7, 137.8, 130.6, 128.5, 128.2, 118.6, 24.4.

### 2-Phenylpyrazine (**3r**)<sup>15</sup>

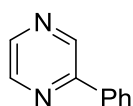

(14) Zhao, D.; Wang, T.; Shen, Q.; Li, J. *Chem. Comm.* **2014**, 50, 4302.

(15) Thapa, S.; Basnet, P.; Gurung, S. K.; Giri, R. *Chem. Comm.* **2015**, 51, 4009.

**3r** was prepared from 2-chloropyrazine (29 mg, 0.25 mmol) and PhB(neo) (72 mg, 0.375 mmol, 1.5 eq). The crude mixture was purified by flash column chromatography (10% Et<sub>2</sub>O with 1% TEA/petroleum ether) to afford the desired product as white solid (27.7 mg, 71%).

<sup>1</sup>H NMR (400 MHz, CDCl<sub>3</sub>) δ 9.04 (d, *J* = 1.6 Hz, 1H), 8.64 (dd, *J* = 2.5, 1.6 Hz, 1H), 8.52 (d, *J* = 2.5 Hz, 1H), 8.07 – 7.99 (m, 2H), 7.57 – 7.44 (m, 3H). <sup>13</sup>C{<sup>1</sup>H} NMR (101 MHz, CDCl<sub>3</sub>) δ 153.1, 144.4, 142.5, 141.9, 136.2, 130.2, 129.2, 127.1.

### 3-Phenylpyridine (**3s**)<sup>9</sup>

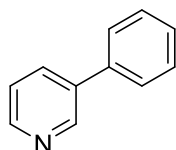

**3s** was prepared from 3-bromopyridine (40 mg, 0.25 mmol) and PhB(neo) (71 mg, 0.375 mmol, 1.5 eq). The crude mixture was purified by flash column chromatography (10% Et<sub>2</sub>O with 1% TEA/pentane) to afford the desired product as a colourless oil (21 mg, 54%). <sup>1</sup>H NMR (400 MHz, CDCl<sub>3</sub>) δ 8.85 (dd, *J* = 2.4, 0.9 Hz, 1H), 8.59 (dd, *J* = 4.8, 1.6 Hz, 1H), 7.89 (dd, *J* = 7.9, 0.7 Hz, 1H), 7.63 – 7.54 (m, 2H), 7.48 (t, *J* = 7.4 Hz, 2H), 7.45 – 7.34 (m, 2H). <sup>13</sup>C{<sup>1</sup>H} NMR (101 MHz, CDCl<sub>3</sub>) δ 148.1, 148.0, 137.7, 136.8, 134.7, 129.1, 128.2, 127.2, 123.7.

### 2-Methoxy-5-phenylpyridine (**3t**)<sup>10</sup>

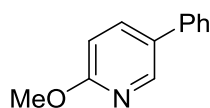

**3t** was prepared from 5-bromo-2-methoxypyridine (94 mg, 0.5 mmol) and PhB(neo) (143 mg, 0.75 mmol, 1.5 eq). The crude mixture was purified by flash column chromatography (5% Et<sub>2</sub>O with 1% TEA/pentane) to afford the desired product as a colourless oil (61 mg, 66%). <sup>1</sup>H NMR (400 MHz, CDCl<sub>3</sub>) δ 8.39 (dd, *J* = 2.6, 0.8 Hz, 1H), 7.80 (dd, *J* = 8.6, 2.6 Hz, 1H), 7.57 – 7.49 (m, 2H), 7.49 – 7.41 (m, 2H), 7.36 (d, *J* = 7.3 Hz, 1H), 6.82 (dd, *J* = 8.6, 0.8 Hz, 1H), 3.99 (s, 3H). <sup>13</sup>C{<sup>1</sup>H} NMR (101 MHz, CDCl<sub>3</sub>) δ 163.6, 145.0, 137.9, 137.6, 130.2, 129.0, 127.4, 126.7, 110.9, 53.6.

### 5-Phenylpyrimidine (**3u**)<sup>10</sup>

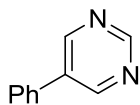

**3u** was prepared from 5-bromopyrimidine (80 mg, 0.5 mmol) and PhB(neo) (143 mg, 0.75 mmol, 1.5 eq). The crude mixture was purified by flash column chromatography (30% DCM with 1% TEA/ pentane) to afford the desired product as a yellow oil (68mg, 87%). <sup>1</sup>H NMR (400 MHz, (CD<sub>3</sub>)<sub>2</sub>CO) δ 9.14 (s, 1H), 9.05 (d, *J* = 1.6 Hz, 2H), 7.82 – 7.71 (m, 2H), 7.61 – 7.45 (m, 3H). <sup>13</sup>C{<sup>1</sup>H} NMR (101 MHz, (CD<sub>3</sub>)<sub>2</sub>CO) δ 158.3, 155.6, 135.4, 134.9, 130.2, 129.7, 127.9.

### 1-Methyl-4-phenyl-1*H*-imidazole (**3v**)<sup>16</sup>

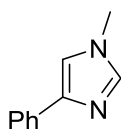

**3v** was prepared from 4-bromo-1-methyl-1*H*-imidazole (81 mg, 0.5 mmol) and PhB(neo) (143 mg, 0.75 mmol, 1.5 eq). The crude mixture was purified by flash column chromatography (20% acetone / dichloromethane) to afford the desired product as a colourless oil (61 mg, 77%). <sup>1</sup>H NMR (400 MHz, (CD<sub>3</sub>)<sub>2</sub>CO) δ 7.81 (dd, *J* = 2.0, 1.4 Hz, 1H), 7.79 (t, *J* = 1.0 Hz, 1H), 7.51 (d, *J* = 1.3 Hz, 1H), 7.45 (d, *J* = 1.3 Hz, 1H), 7.35 – 7.28 (m, 2H), 7.19 – 7.13 (m, 1H), 3.76 (s, 3H). <sup>13</sup>C{<sup>1</sup>H} NMR (101 MHz, (CD<sub>3</sub>)<sub>2</sub>CO) δ 142.5, 139.1, 136.1, 129.2, 126.9, 125.3, 117.2, 33.4.

### 3-Phenylquinoline (**3w**)<sup>17</sup>

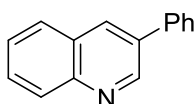

**3w** was prepared from 3-bromoquinoline (104 mg, 0.5 mmol) and PhB(neo) (143 mg, 0.75 mmol, 1.5 eq). The crude mixture was purified by flash column chromatography (5-30%

(16) Kuma, S.; Jaller, D.; Patel, B.; LaLonde, J. M.; DuHadaway, J. B.; Malachowski, W. P.; Prendergast, G. C.; Muller, A. J. *J. Med. Chem.* **2008**, *51*, 4968.

(17) Qiu, D.; Jin, L.; Zheng, Z.; Meng, H.; Mo, F.; Wang, X.; Zhang, Y.; Wang, J. *J. Org. Chem.* **2013**, *78*, 1923.

Et<sub>2</sub>O with 1% TEA/pentane) to afford the desired product as a colourless oil (80 mg, 78%). <sup>1</sup>H NMR (400 MHz, CDCl<sub>3</sub>) δ 9.19 (dd, *J* = 2.4, 0.8 Hz, 1H), 8.34 – 8.28 (m, 1H), 8.16 (d, *J* = 8.5 Hz, 1H), 7.89 (dq, *J* = 8.2, 1.4 Hz, 1H), 7.78 – 7.68 (m, 3H), 7.56 (dddd, *J* = 22.7, 8.0, 6.6, 1.4 Hz, 3H), 7.44 (td, *J* = 7.4, 1.4 Hz, 1H). <sup>13</sup>C{<sup>1</sup>H} NMR (101 MHz, CDCl<sub>3</sub>) δ 149.8, 147.3, 137.8, 133.8, 133.3, 129.4, 129.2, 129.2, 128.1, 128.0, 127.4, 127.0.

#### 6-Phenylquinoline (**3x**)<sup>9</sup>

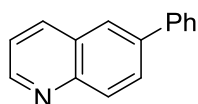

**3x** was prepared from 6-bromoquinoline (104 mg, 0.5 mmol) and PhB(neo) (143 mg, 0.75 mmol, 1.5 eq). The crude mixture was purified by flash column chromatography (30% Et<sub>2</sub>O with 1% TEA/pentane) to afford the desired product as a white solid (65 mg, 63%). <sup>1</sup>H NMR (400 MHz, CDCl<sub>3</sub>) δ 8.92 (dd, *J* = 4.3, 1.7 Hz, 1H), 8.21 (dd, *J* = 8.8, 6.0 Hz, 2H), 7.99 (dd, *J* = 7.6, 1.8 Hz, 2H), 7.75 – 7.68 (m, 2H), 7.50 (dd, *J* = 8.3, 6.9 Hz, 2H), 7.46 – 7.38 (m, 2H). <sup>13</sup>C{<sup>1</sup>H} NMR (101 MHz, CDCl<sub>3</sub>) δ 150.2, 147.5, 140.3, 139.5, 136.5, 129.8, 129.4, 129.0, 128.5, 127.8, 127.5, 125.5, 121.5.

#### 8-Phenylquinoline (**3y**)<sup>10</sup>

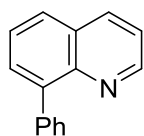

**3y** was prepared from 8-bromoquinoline (104 mg, 0.5 mmol) and PhB(neo) (143 mg, 0.75 mmol, 1.5 eq). The crude mixture was purified by flash column chromatography (10% Et<sub>2</sub>O with 1% TEA/pentane) to afford the desired product as a yellow oil (76 mg, 74%). <sup>1</sup>H NMR (400 MHz, CDCl<sub>3</sub>) δ 8.99 (dd, *J* = 4.2, 1.8 Hz, 1H), 8.21 (dd, *J* = 8.3, 1.8 Hz, 1H), 7.84 (dd, *J* = 8.1, 1.5 Hz, 1H), 7.80 – 7.71 (m, 3H), 7.62 (dd, *J* = 8.1, 7.2 Hz, 1H), 7.58 – 7.50 (m, 2H), 7.50 – 7.38 (m, 2H). <sup>13</sup>C{<sup>1</sup>H} NMR (101 MHz, CDCl<sub>3</sub>) δ 150.2, 146.0, 140.9, 139.6, 136.3, 130.6, 130.3, 128.7, 128.0, 127.5, 127.4, 126.3, 121.0.

### 2-Phenylthiophene (**3z**)<sup>3</sup>

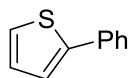

**3z** was prepared from 2-bromothiophene (82 mg, 0.5 mmol) and PhB(neo) (143 mg, 0.75 mmol, 1.5 eq). The crude mixture was purified by flash column chromatography (petroleum ether) to afford the desired product as a yellow solid (59mg, 75%). <sup>1</sup>H NMR (400 MHz, (CD<sub>3</sub>)<sub>2</sub>CO) δ 7.71 – 7.63 (m, 2H), 7.48 – 7.37 (m, 4H), 7.31 (d, *J* = 7.3 Hz, 1H), 7.12 (dd, *J* = 5.1, 3.7 Hz, 1H). <sup>13</sup>C NMR (101 MHz, (CD<sub>3</sub>)<sub>2</sub>CO) δ 144.9, 135.2, 129.9, 129.1, 128.3, 126.5, 125.9, 124.2.

### 3-Phenylfuran (**3aa**)<sup>18</sup>

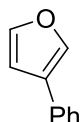

**3aa** was prepared from 3-bromofuran (74 mg, 0.5 mmol) and PhB(neo) (143 mg, 0.75 mmol, 1.5 eq). The crude mixture was purified by flash column chromatography (petroleum ether) to afford the desired product as a white solid (44mg, 61%). <sup>1</sup>H NMR (400 MHz, (CD<sub>3</sub>)<sub>2</sub>CO) δ 8.01 (dd, *J* = 1.6, 0.9 Hz, 1H), 7.66 – 7.58 (m, 3H), 7.42 – 7.34 (m, 2H), 7.30 – 7.23 (m, 1H), 6.88 (dd, *J* = 1.9, 0.9 Hz, 1H). <sup>13</sup>C{<sup>1</sup>H} NMR (101 MHz, (CD<sub>3</sub>)<sub>2</sub>CO) δ 144.9, 139.8, 133.4, 129.6, 127.7, 127.3, 126.5, 109.5.

### 5-Chloro-2-phenylpyridine (**3ab**)<sup>19</sup>

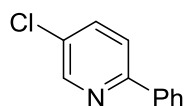

(18) Heijne, D.; Tosi, F.; Vila, C.; Stuart, M.C.A.; Elsinga, P. H.; Szymanski, W.; Feringa, B. L. *Angew. Chem. Int. Ed.* **2017**, *56*, 3354.

(19) Liu, K. M.; Liao, L. Y.; Duan, X. F. *Chem. Comm.* **2015**, *51*, 1124.

**3ab** was prepared from 2,5-dichloropyridine (74 mg, 0.5 mmol) and PhB(neo) (114 mg, 0.6 mmol, 1.2 eq). The crude mixture was purified by flash column chromatography (1-5% Et<sub>2</sub>O /petroleum ether) to afford the desired product as a white solid (89 mg, 94%). <sup>1</sup>H NMR (400 MHz, CDCl<sub>3</sub>) δ 8.64 (dd, *J* = 2.5, 0.8 Hz, 1H), 8.03 – 7.91 (m, 2H), 7.78 – 7.63 (m, 2H), 7.54 – 7.37 (m, 3H). <sup>13</sup>C{<sup>1</sup>H} NMR (101 MHz, CDCl<sub>3</sub>) δ 155.6, 148.4, 138.1, 136.7, 130.7, 129.4, 128.9, 126.9, 121.3.

#### 5-Bromo-2-phenylpyridine (**3ac**)

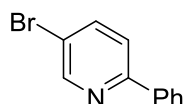

**3ac** was prepared from 5-bromo-2-chloropyridine (96 mg, 0.5 mmol) and PhB(neo) (114 mg, 0.6 mmol, 1.2 eq). The crude mixture was purified by flash column chromatography (1-5% Et<sub>2</sub>O /petroleum ether) to afford the desired product as a white solid (87 mg, 74%) together with 2-Chloro-5-phenylpyridine (**3ac'**) (8 mg, 8%).

**3ac**:<sup>20</sup> <sup>1</sup>H NMR (400 MHz, CDCl<sub>3</sub>) δ 8.74 (dd, *J* = 2.4, 0.8 Hz, 1H), 8.02 – 7.92 (m, 2H), 7.87 (dd, *J* = 8.5, 2.4 Hz, 1H), 7.63 (dd, *J* = 8.5, 0.8 Hz, 1H), 7.54 – 7.38 (m, 3H). <sup>13</sup>C{<sup>1</sup>H} NMR (101 MHz, CDCl<sub>3</sub>) δ 156.0, 150.7, 139.5, 138.2, 129.5, 129.0, 126.9, 121.8, 119.4.

**3ac'**:<sup>21</sup> <sup>1</sup>H NMR (400 MHz, CDCl<sub>3</sub>) δ 8.61 (d, *J* = 2.5 Hz, 1H), 7.84 (dd, *J* = 8.3, 2.6 Hz, 1H), 7.59 – 7.52 (m, 2H), 7.49 (ddd, *J* = 7.6, 6.7, 1.4 Hz, 2H), 7.42 (dd, *J* = 12.6, 7.7 Hz, 2H). <sup>13</sup>C NMR (101 MHz, CDCl<sub>3</sub>) δ 150.4, 148.1, 137.3, 136.6, 135.8, 129.3, 128.6, 127.1, 124.3.

#### 4-(Trifluoromethyl)-1,1'-biphenyl (**3ae**)<sup>9</sup>

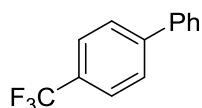

**3ae** was prepared from 1-bromo-4-(trifluoromethyl)benzene (56 mg, 0.25 mmol) and PhB(neo) (71 mg, 0.375 mmol, 1.5 eq). The crude mixture was purified by flash column chromatography (petroleum ether) to afford the desired product as a white solid (43 mg 77%).

(20) Wang, J.; Wang, S.; Wang, G.; Zhang, J.; Yu, X. *Chem. Comm.* **2012**, 48, 11769.

(21) Zhang, E.; Tang, J.; Li, S.; Wu, P.; Moses, J. E.; Sharpless, K. B. *Chem. A Eur. J.* **2016**, 22, 5692

$^1\text{H}$  NMR (400 MHz,  $\text{CDCl}_3$ )  $\delta$  7.70 (s, 4H), 7.63 – 7.58 (m, 2H), 7.51 – 7.45 (m, 2H), 7.42 (d,  $J = 7.2$  Hz, 1H).  $^{13}\text{C}\{^1\text{H}\}$  NMR (101 MHz,  $\text{CDCl}_3$ )  $\delta$  144.8 (q, 2.0 Hz), 139.9, 129.3 (d,  $^2J = 32.3$  Hz), 129.1, 128.8, 128.3, 127.4, 127.3, 125.8 (q,  $^3J = 3.0$  Hz), 121.7 (q,  $J = 272.7$  Hz).

[1,1'-Biphenyl]-4-carbonitrile (**3af**)<sup>9</sup>

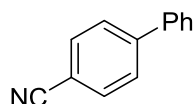

**3af** was prepared from 4-bromobenzonitrile (46 mg, 0.25 mmol) and PhB(neo) (71 mg, 0.375 mmol, 1.5 eq). The crude mixture was purified by flash column chromatography (15% DCM with 1% TEA/ petroleum ether) to afford the desired product as a white solid (33 mg, 74%).

**3af** was prepared from 4-chlorobenzonitrile (34 mg, 0.25 mmol) and PhB(neo) (71 mg, 0.375 mmol, 1.5 eq). The crude mixture was purified by flash column chromatography (15% DCM with 1% TEA/ petroleum ether) to afford the desired product as a white solid (27 mg, 60%).

$^1\text{H}$  NMR (400 MHz,  $(\text{CD}_3)_2\text{CO}$ )  $\delta$  7.88 (m,  $J = 2.0$  Hz, 4H), 7.77 – 7.71 (m, 2H), 7.57 – 7.49 (m, 2H), 7.46 (d,  $J = 7.2$  Hz, 1H).  $^{13}\text{C}\{^1\text{H}\}$  NMR (101 MHz,  $(\text{CD}_3)_2\text{CO}$ )  $\delta$  146.2, 139.9, 133.5, 130.0, 129.5, 128.6, 128.0, 119.4, 111.8.

1-([1,1'-Biphenyl]-4-yl)ethan-1-one (**3ag**)<sup>22</sup>

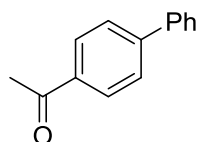

**3ag** was prepared from 5-bromo-2-chloropyridine (99 mg, 0.5 mmol) and PhB(neo) (143 mg, 0.75 mmol, 1.5 eq). The crude mixture was purified by flash column chromatography (10-20%  $\text{Et}_2\text{O}$  with 1% TEA/petroleum ether) to afford the desired product as a white solid (51 mg, 52%).  $^1\text{H}$  NMR (400 MHz,  $\text{CDCl}_3$ )  $\delta$  8.07 – 8.01 (m, 2H), 7.71 – 7.67 (m, 2H), 7.66 – 7.61

(22) Penafiel, I., Pastor, I. M., Yus, M., *Eur. J. Org. Chem.* **2013**, 1479.



(m, 2H), 7.51 – 7.45 (m, 2H), 7.44 – 7.38 (m, 1H), 2.65 (s, 3H).  $^{13}\text{C}$  { $^1\text{H}$ } NMR (101 MHz,  $\text{CDCl}_3$ )  $\delta$  197.8, 145.9, 140.0, 135.9, 129.0, 129.0, 128.3, 127.4, 127.3, 26.8.

Methyl [1,1'-biphenyl]-3-carboxylate (**3ah**)<sup>9</sup>

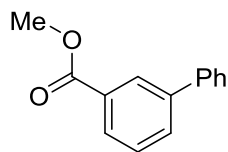

**3ah** was prepared from methyl 3-bromobenzoate (108 mg, 0.5 mmol) and PhB(neo) (143 mg, 0.75 mmol, 1.5 eq). The crude mixture was purified by flash column chromatography (5-20% DCM with 1% TEA/ petroleum ether) to afford the desired product as a colourless oil (69mg, 65%).  $^1\text{H}$  NMR (400 MHz,  $(\text{CD}_3)_2\text{CO}$ )  $\delta$  8.26 (t,  $J$  = 1.8 Hz, 1H), 8.00 (dt,  $J$  = 7.7, 1.4 Hz, 1H), 7.92 (ddd,  $J$  = 7.8, 2.0, 1.2 Hz, 1H), 7.74 – 7.67 (m, 2H), 7.61 (td,  $J$  = 7.8, 0.6 Hz, 1H), 7.56 – 7.47 (m, 2H), 7.46 – 7.38 (m, 1H), 3.92 (s, 3H).  $^{13}\text{C}$  { $^1\text{H}$ } NMR (101 MHz,  $(\text{CD}_3)_2\text{CO}$ )  $\delta$  167.1, 142.2, 140.7, 132.2, 131.8, 130.0, 129.8, 129.0, 128.7, 128.5, 127.8, 52.4.

Methyl 4'-methoxy-[1,1'-biphenyl]-3-carboxylate (**3ak**)<sup>23</sup>

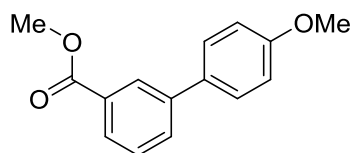

**3ak** was prepared from methyl 3-bromobenzoate (108 mg, 0.5 mmol) and 2-(4-methoxyphenyl)-5,5-dimethyl-1,3,2-dioxaborinane (165 mg, 0.75 mmol, 1.5 eq). The crude mixture was purified by flash column chromatography (20% DCM with 1% TEA/ petroleum ether) to afford the desired product as a white solid (88 mg, 73%).  $^1\text{H}$  NMR (400 MHz,  $(\text{CD}_3)_2\text{CO}$ )  $\delta$  8.24 – 8.19 (m, 1H), 7.95 (ddd,  $J$  = 7.7, 1.7, 1.2 Hz, 1H), 7.88 (ddd,  $J$  = 7.8, 2.0, 1.1 Hz, 1H), 7.70 – 7.63 (m, 2H), 7.57 (td,  $J$  = 7.8, 0.6 Hz, 1H), 7.11 – 7.03 (m, 2H), 3.91 (s, 3H), 3.86 (s, 3H).  $^{13}\text{C}$  { $^1\text{H}$ } NMR (101 MHz,  $(\text{CD}_3)_2\text{CO}$ )  $\delta$  160.7, 141.8, 133.0, 131.7, 129.9, 128.8, 128.3, 127.9, 115.2, 55.6, 52.4.

4'-(Trifluoromethyl)-[1,1'-biphenyl]-4-carbonitrile (**3al**)<sup>24</sup>

(23) Leowanawat, P.; Zhang, N.; Resmerita, A-M.; Rosen, B. M.; Percec, V. *J. Org. Chem.* **2011**, 76, 9946.

(24) Hua, X.; Masson-Makdissi, J.; Sullivan, R. J.; Newman, S. G. *Org. Lett.* **2016**, 18, 5312.

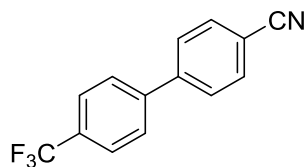

**3al** was prepared from 4-chlorobenzonitrile (34 mg, 0.25 mmol) and PhB(neo) (72 mg, 0.375 mmol, 1.5 eq). The crude mixture was purified by flash column chromatography (15% Et<sub>2</sub>O /petroleum ether) to afford the desired product as a white solid (58 mg, 93%). <sup>1</sup>H NMR (400 MHz, (CD<sub>3</sub>)<sub>2</sub>CO) δ 8.01 – 7.91 (m, 6H), 7.89 – 7.84 (m, 2H). <sup>13</sup>C{<sup>1</sup>H} NMR (101 MHz, (CD<sub>3</sub>)<sub>2</sub>CO) δ 144.6, 143.8, 133.7, 130.8 (q, *J* = 32.3 Hz), 129.0, 128.9, 126.8 (q, *J* = 4.0 Hz), 125.3 (q, *J* = 271.7 Hz), 119.1, 112.8.

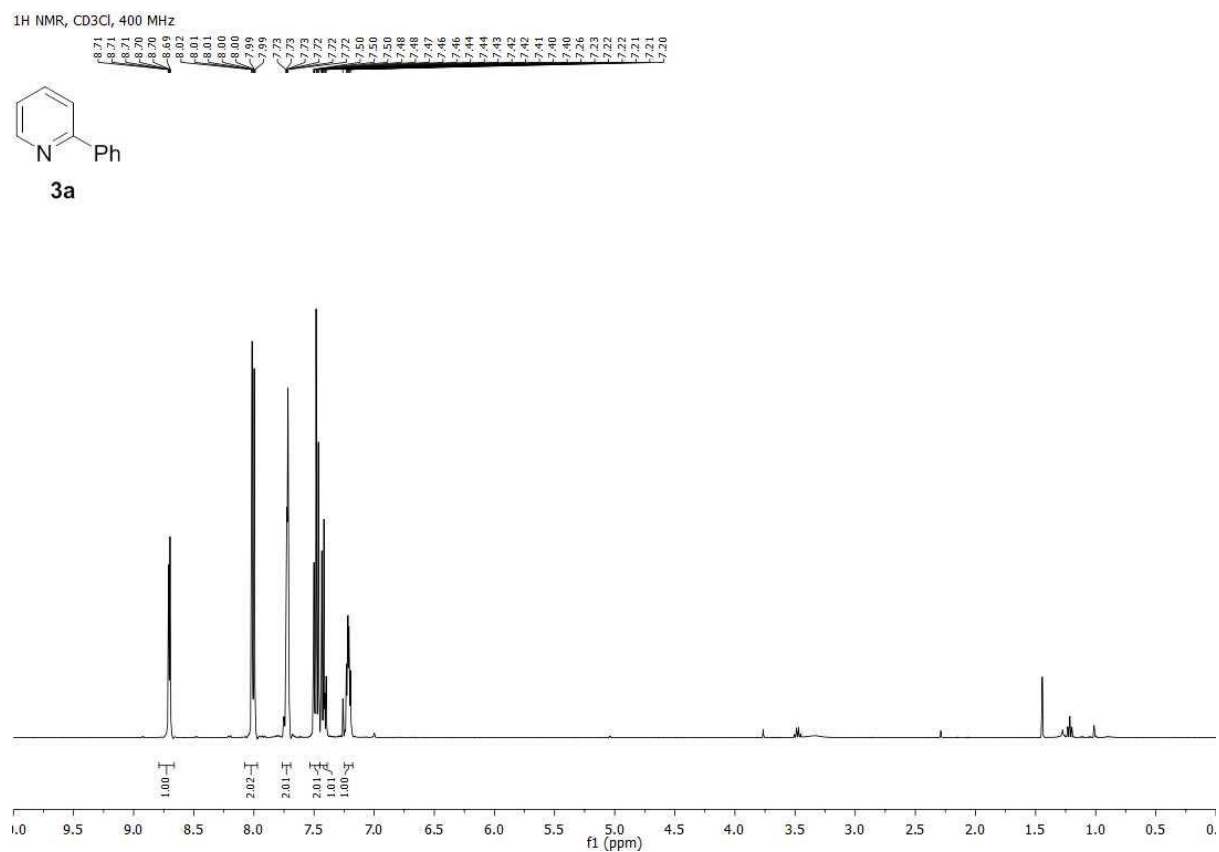

**Figure S1.** <sup>1</sup>H Spectra of **3a**

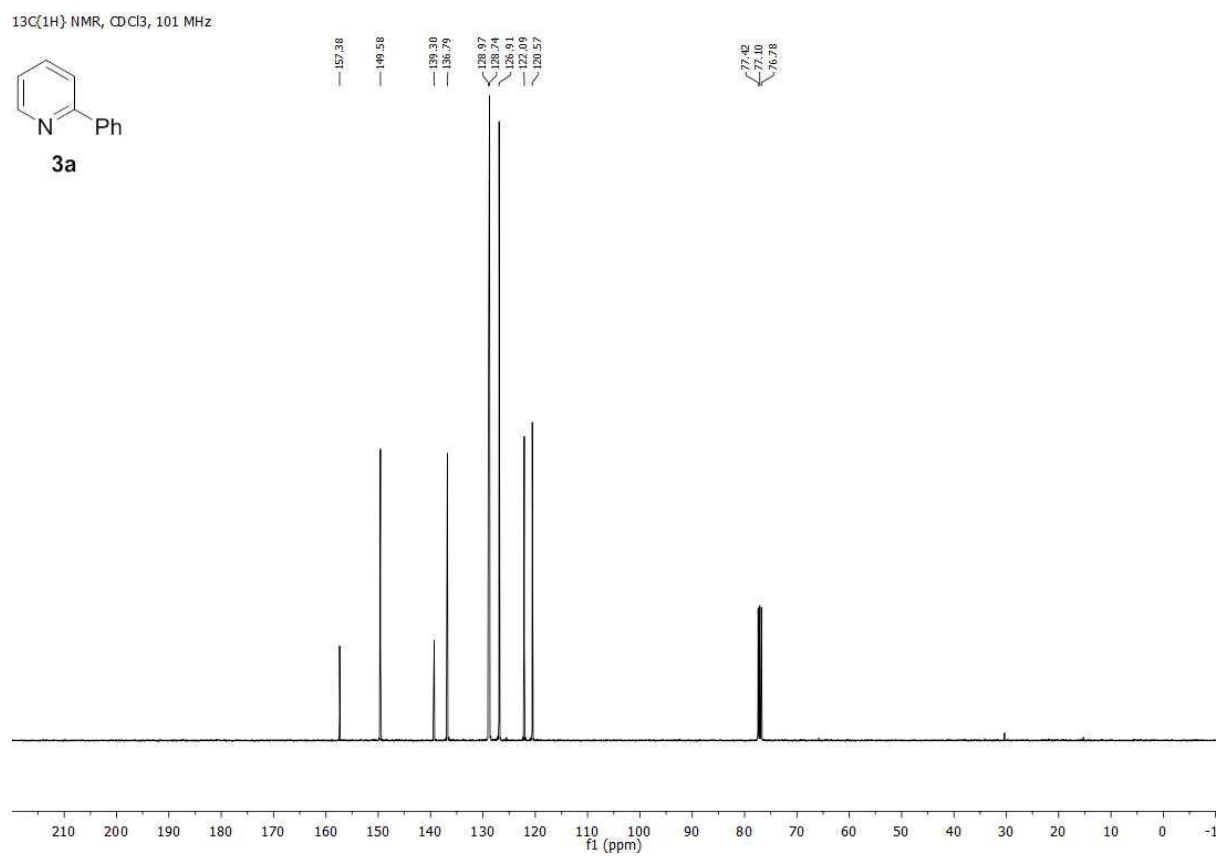

**Figure S2.** <sup>13</sup>C Spectra of **3a**

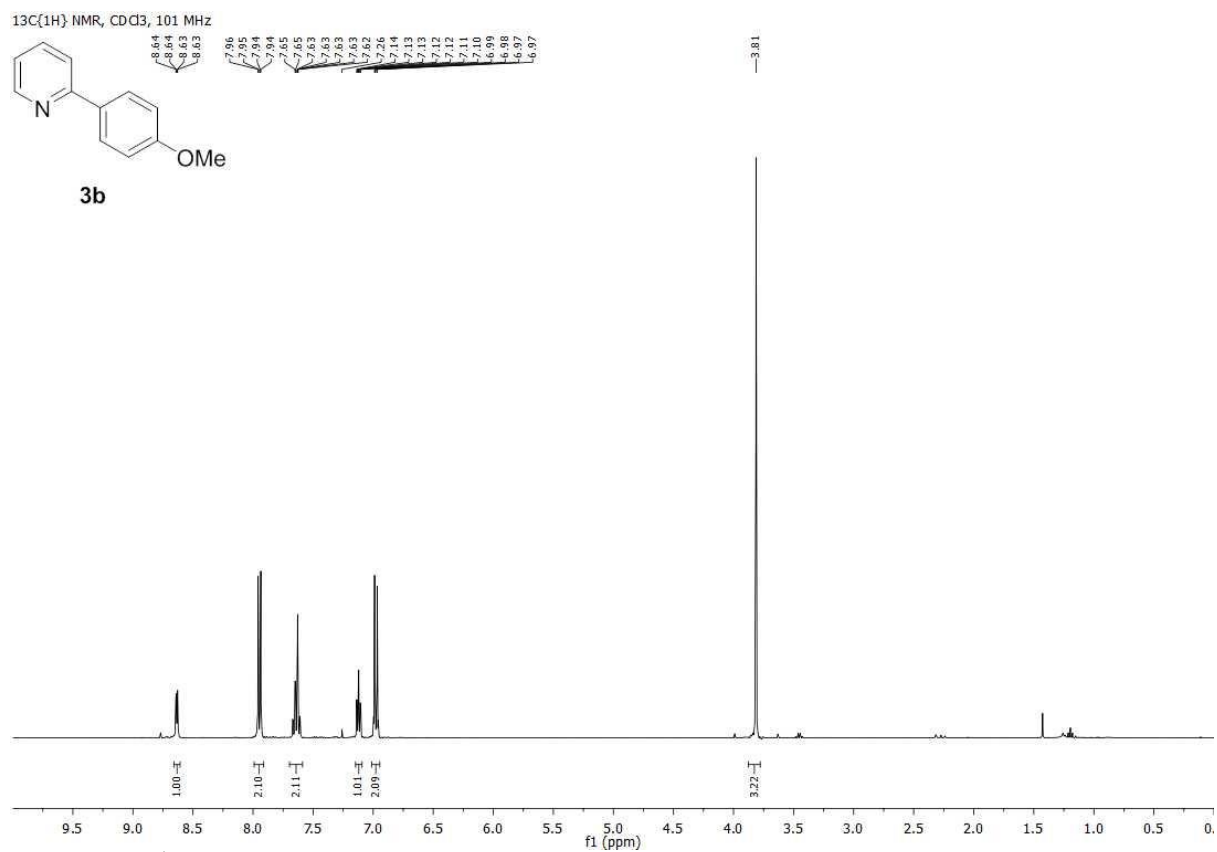

**Figure S3.** <sup>1</sup>H Spectra of **3b**

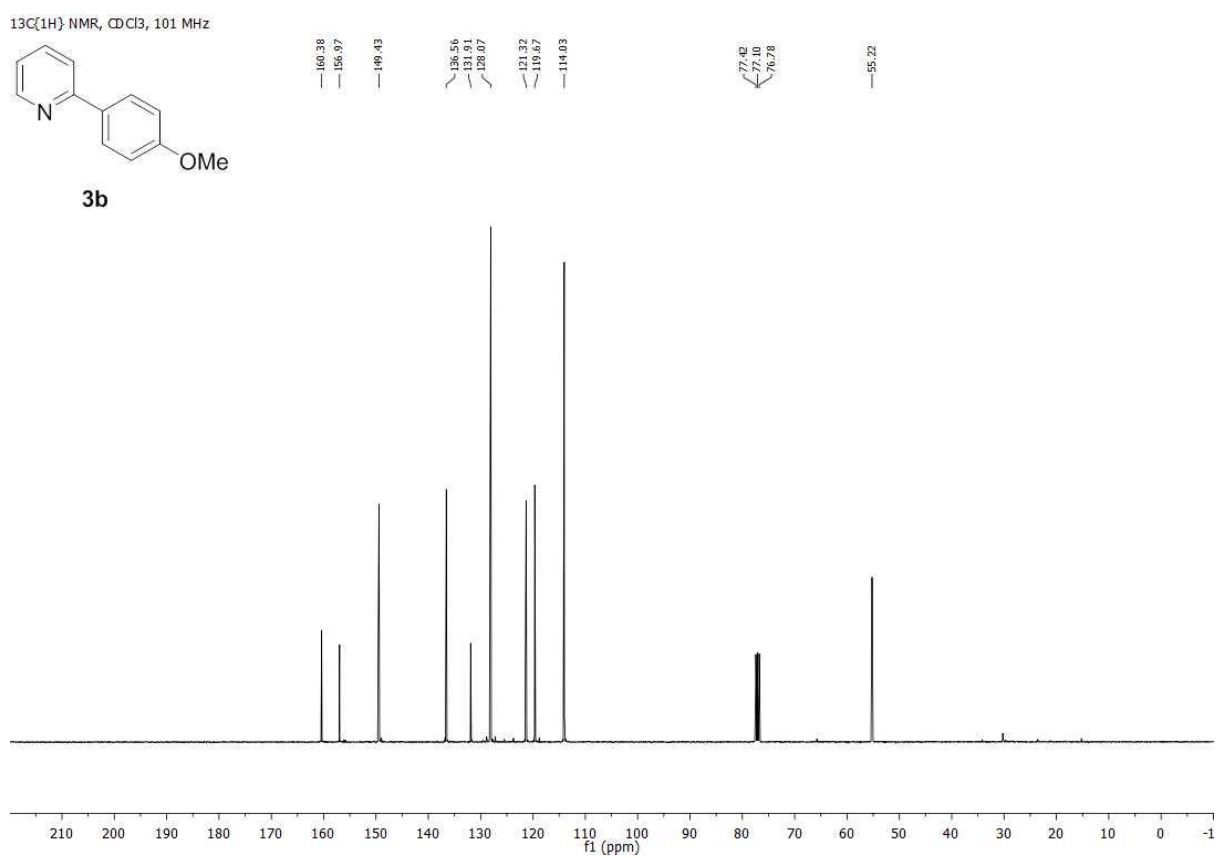

**Figure S4.** <sup>13</sup>C Spectra of **3b**

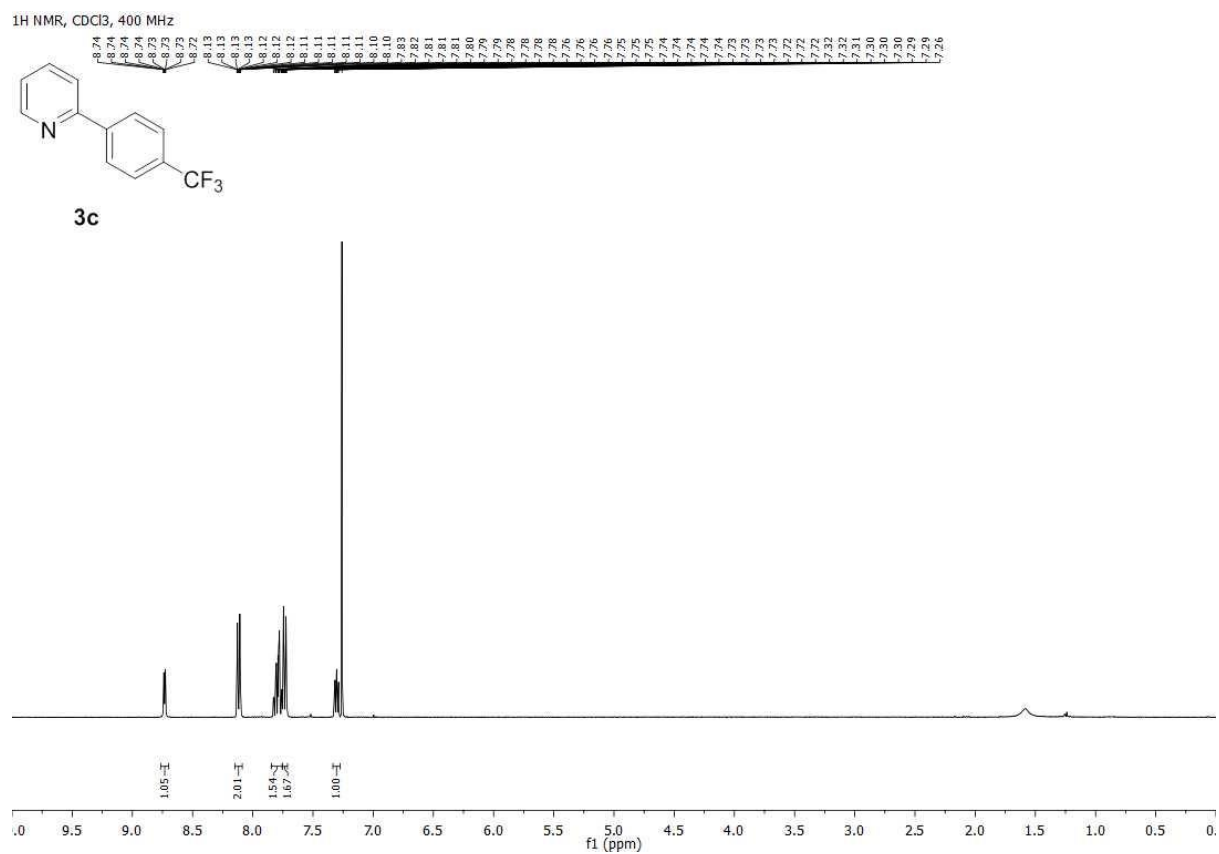

**Figure S5.** <sup>1</sup>H Spectra of **3c**

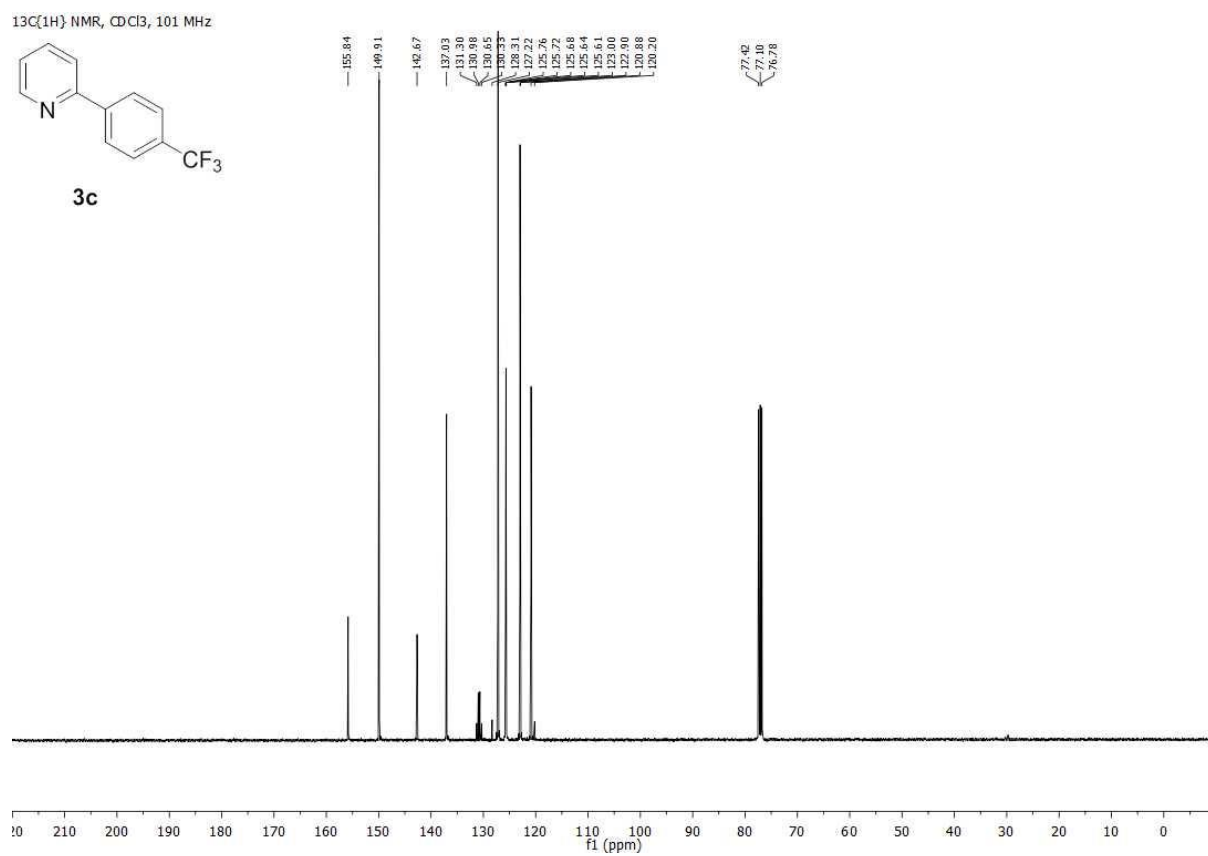

**Figure S6.** <sup>13</sup>C Spectra of **3c**

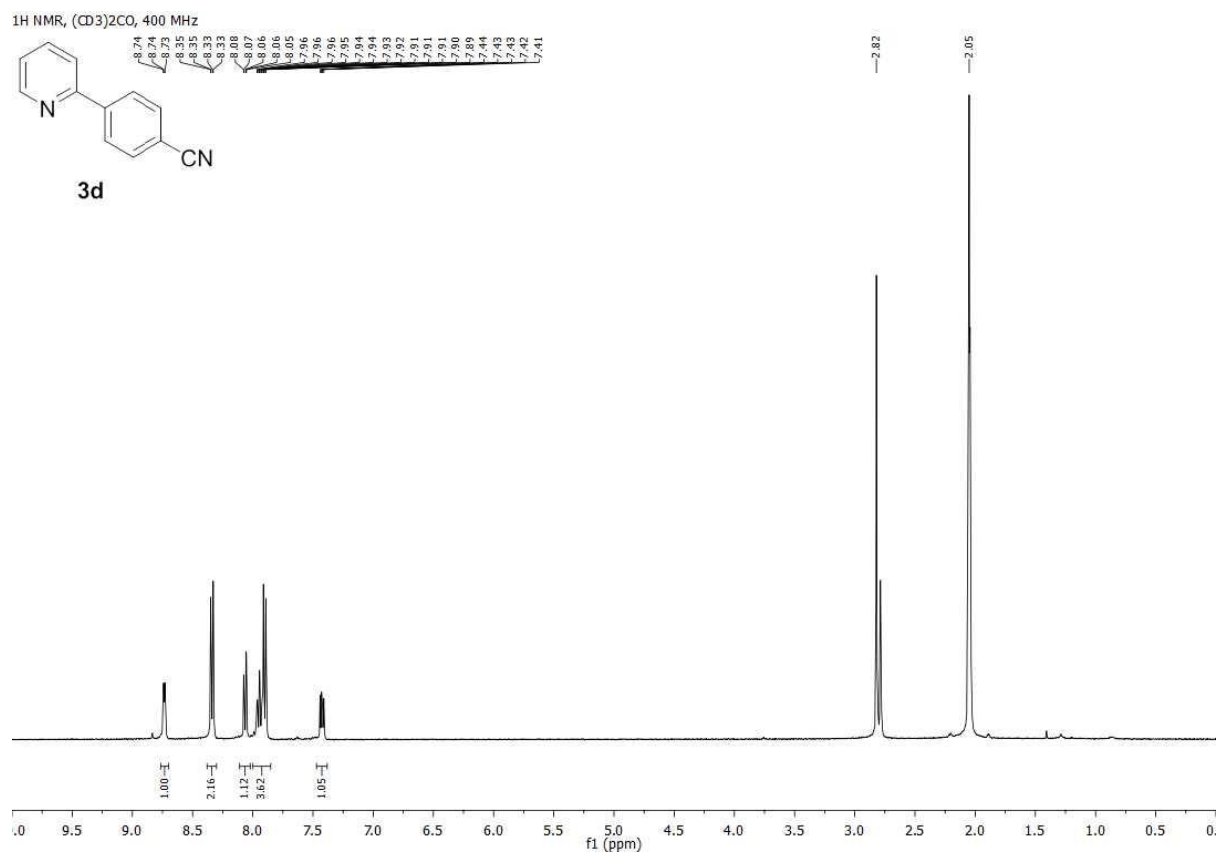

**Figure S7.** <sup>1</sup>H Spectra of **3d**

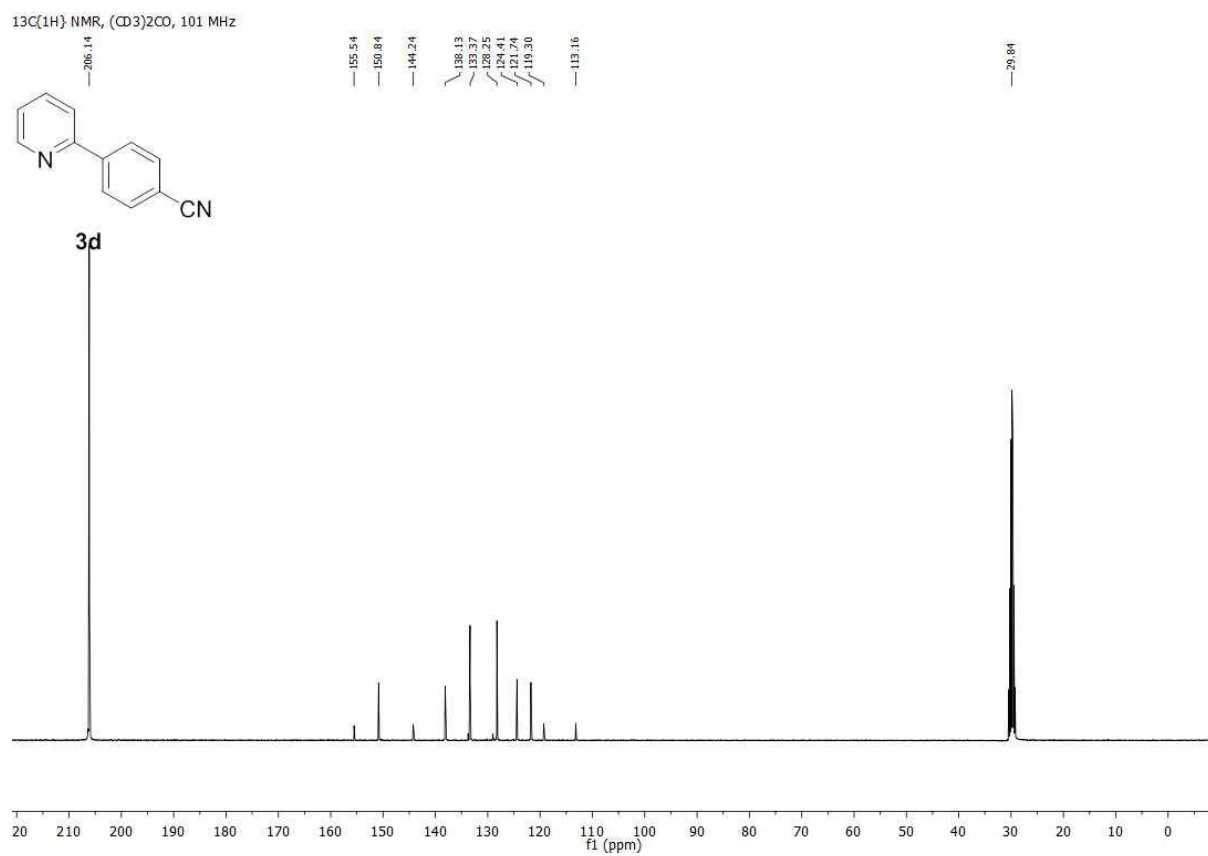

**Figure S8.** <sup>13</sup>C Spectra of **3d**

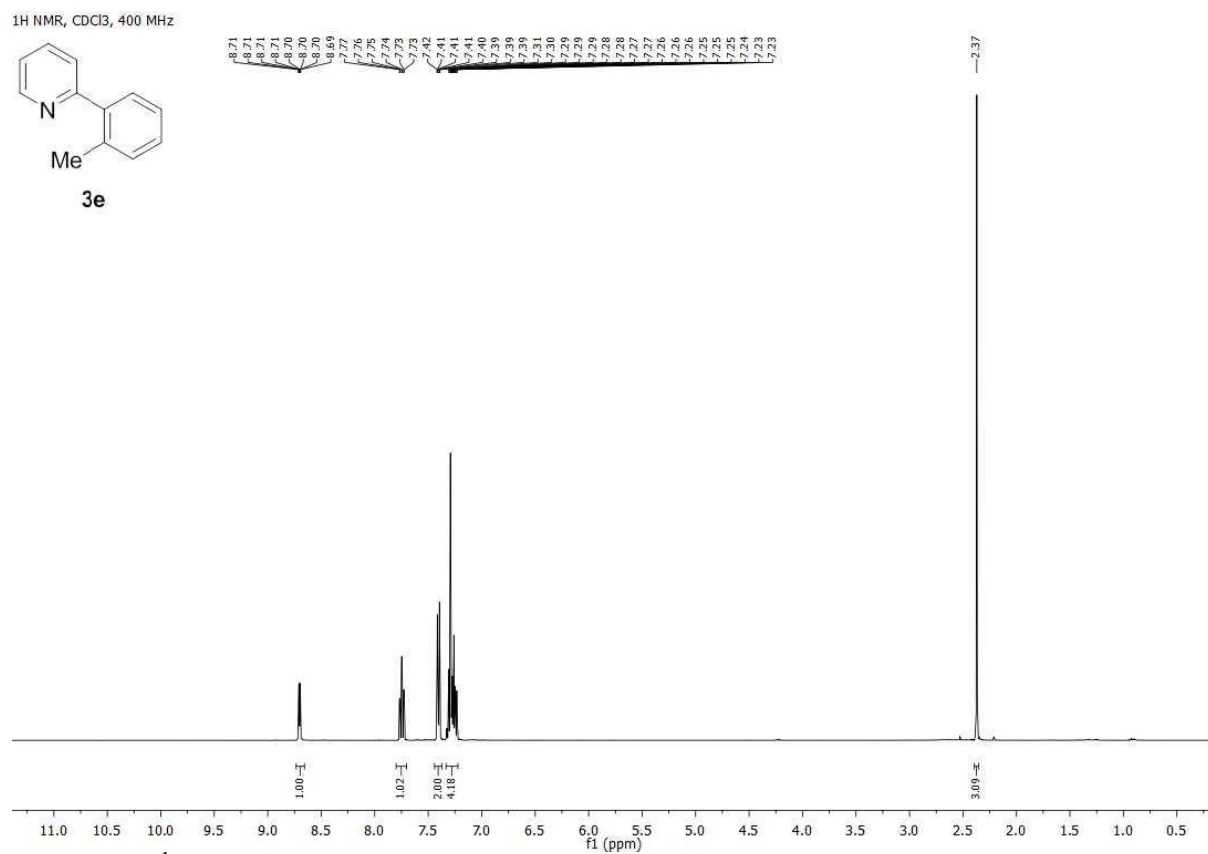

**Figure S9.** <sup>1</sup>H Spectra of **3e**

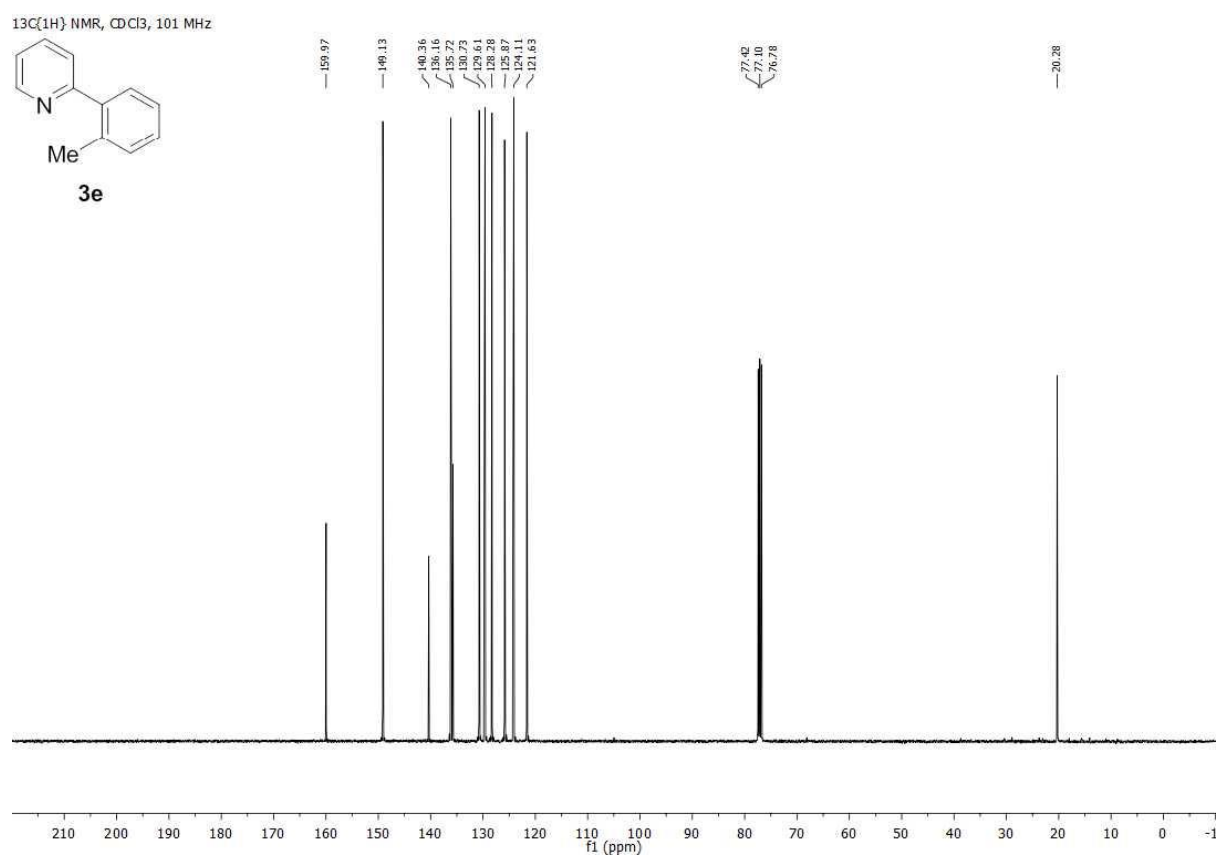

**Figure S10.** <sup>13</sup>C Spectra of **3e**

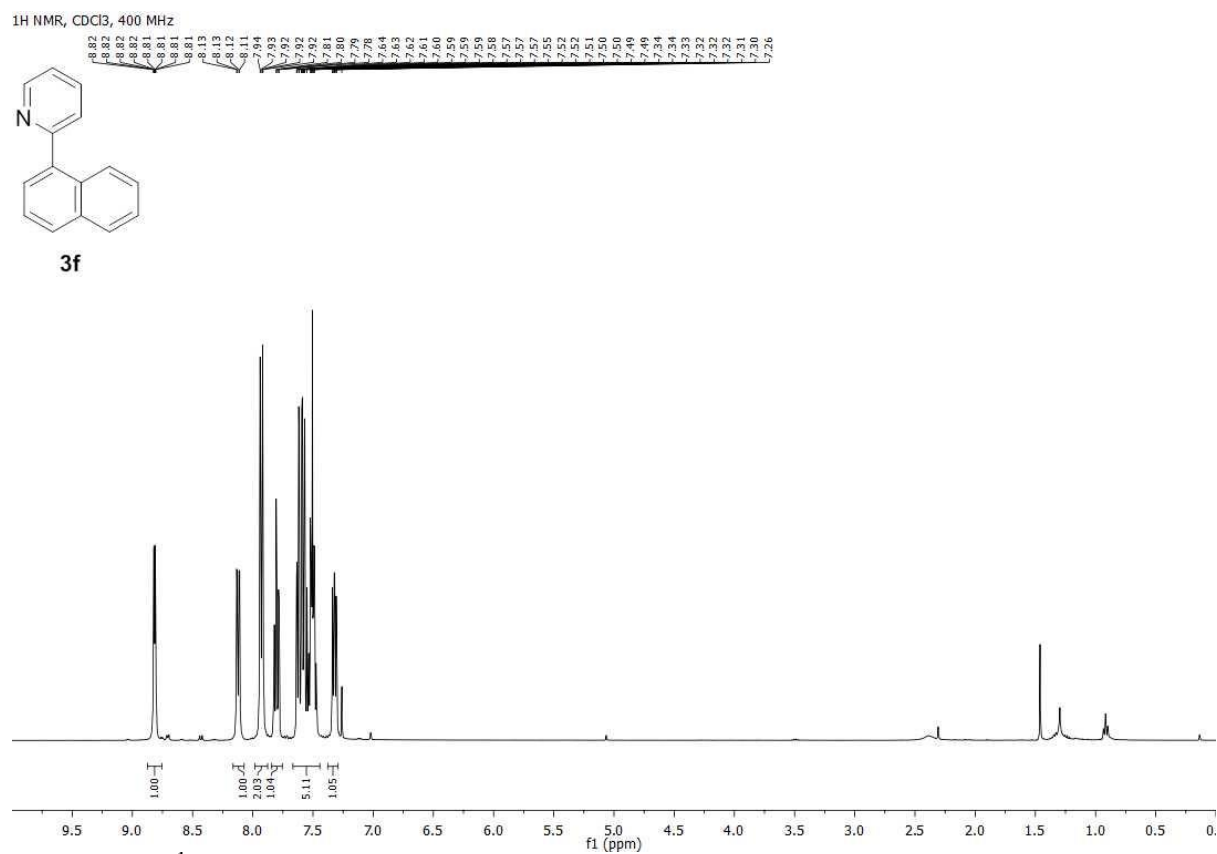

**Figure S11.** <sup>1</sup>H Spectra of **3f**

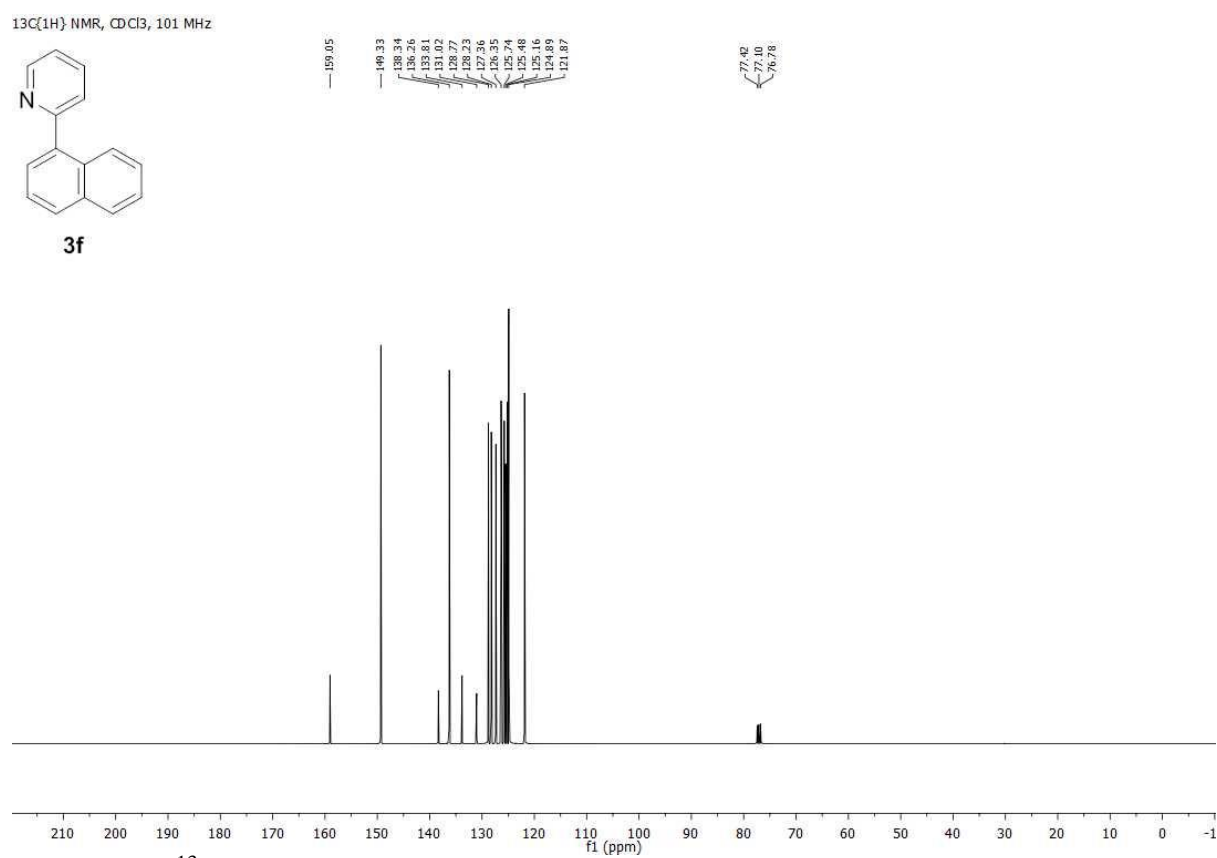

**Figure S12.** <sup>13</sup>C Spectra of **3f**



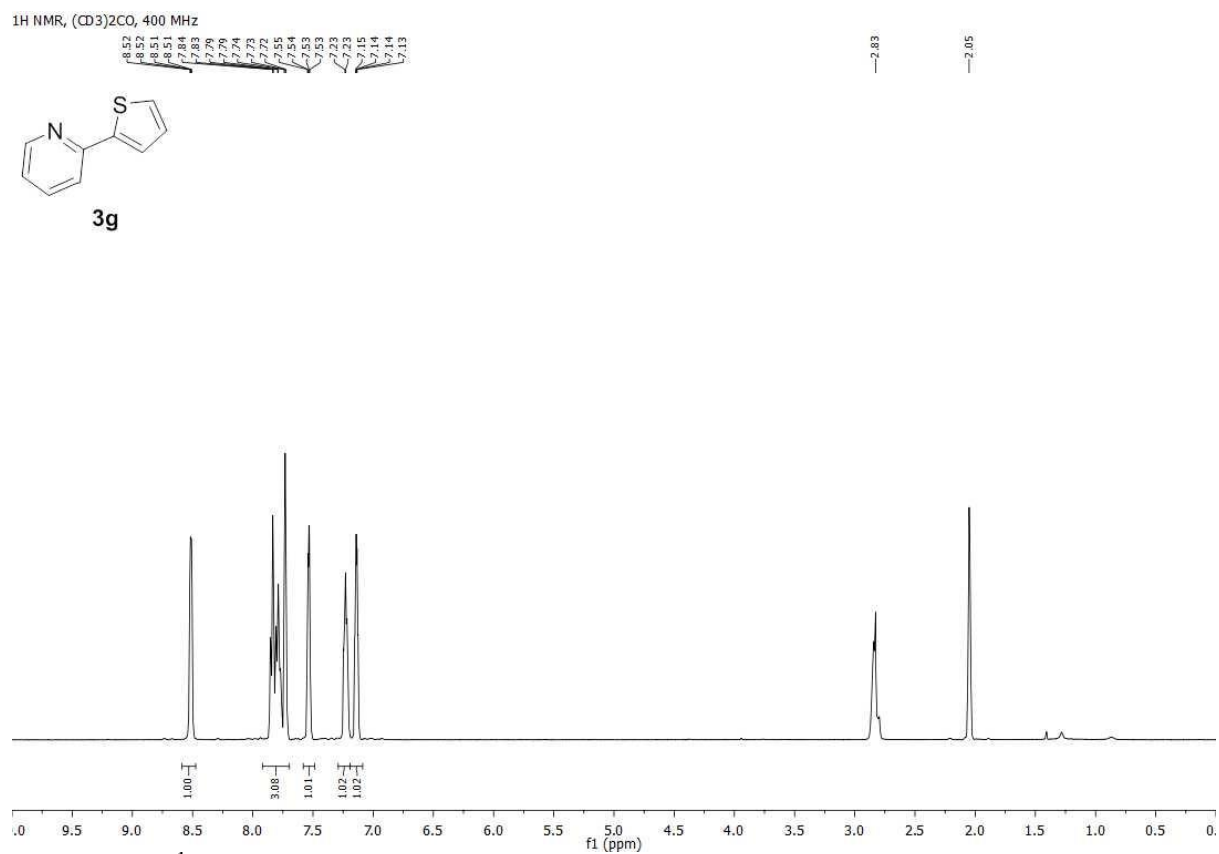

**Figure S13.** <sup>1</sup>H Spectra of **3g**

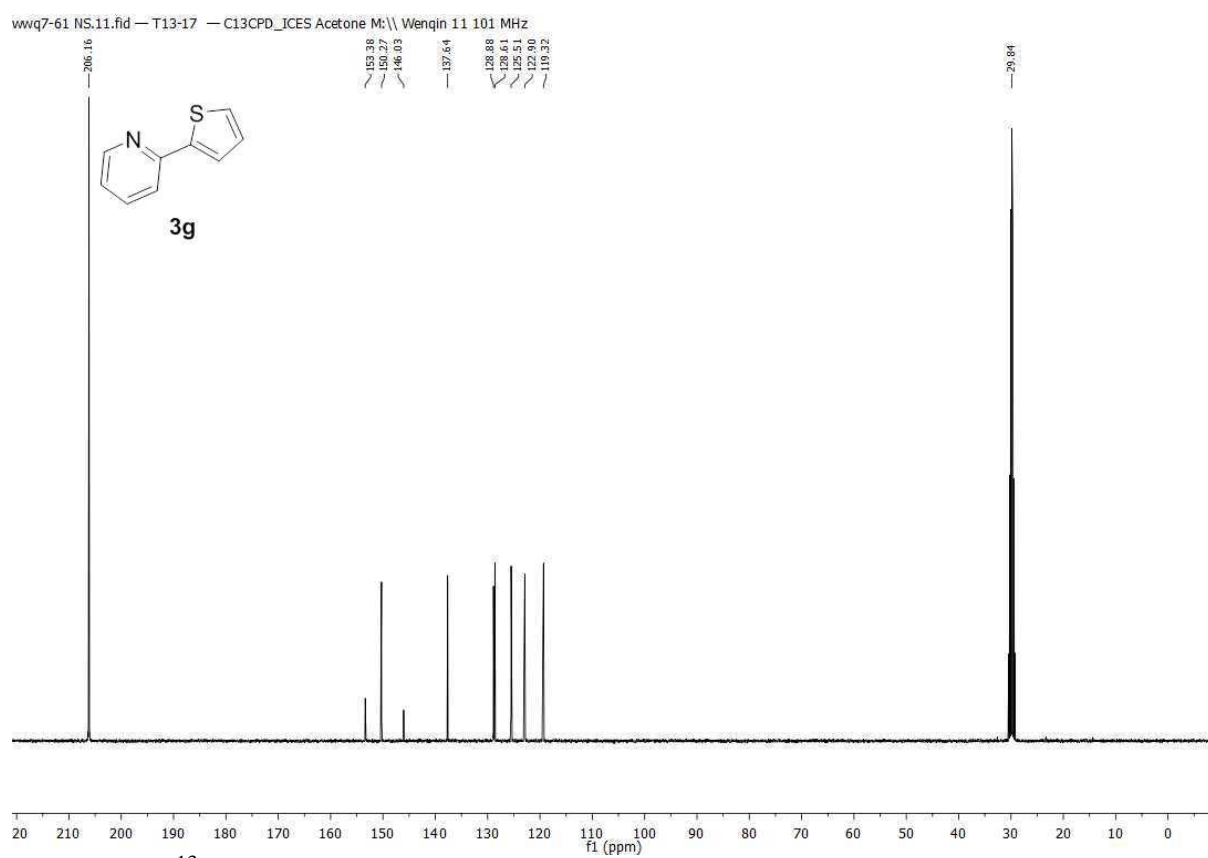

**Figure S14.** <sup>13</sup>C Spectra of **3g**

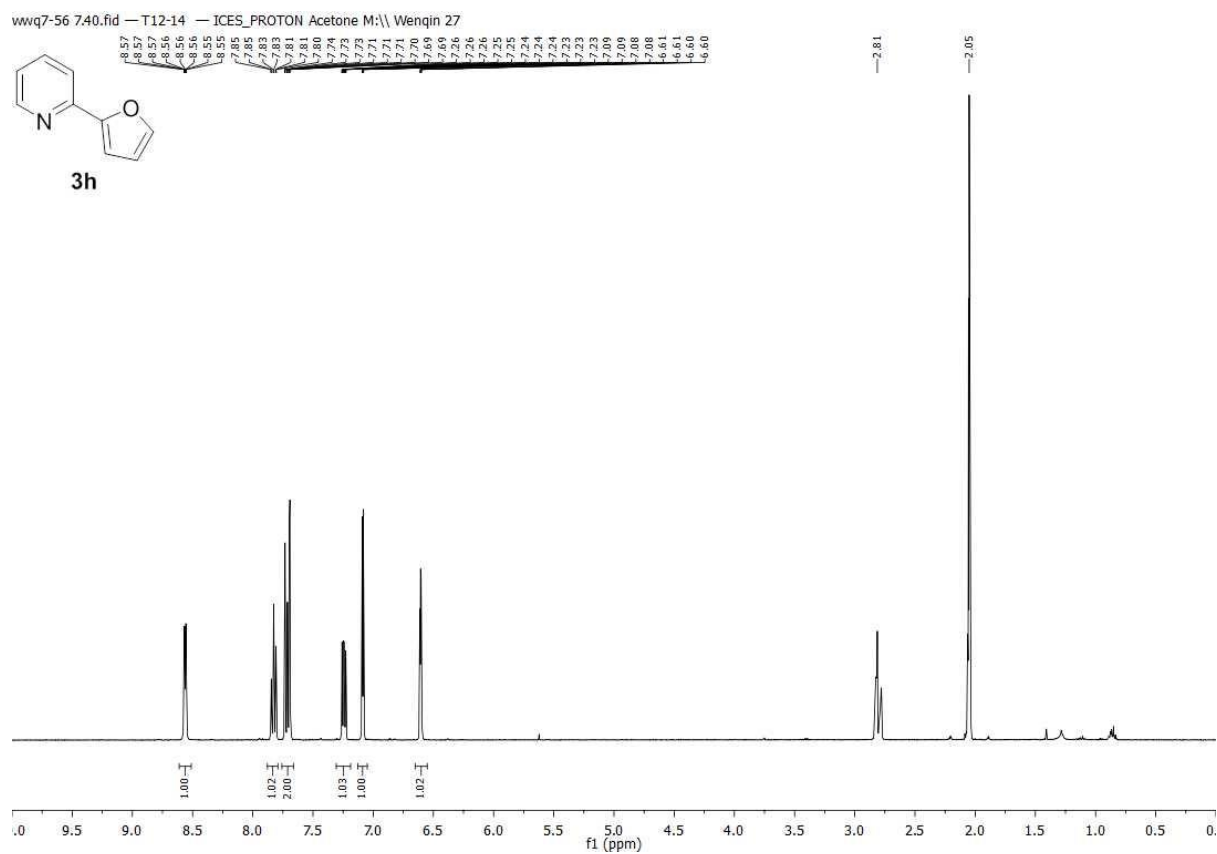

**Figure S15.**  $^1\text{H}$  Spectra of **3h**

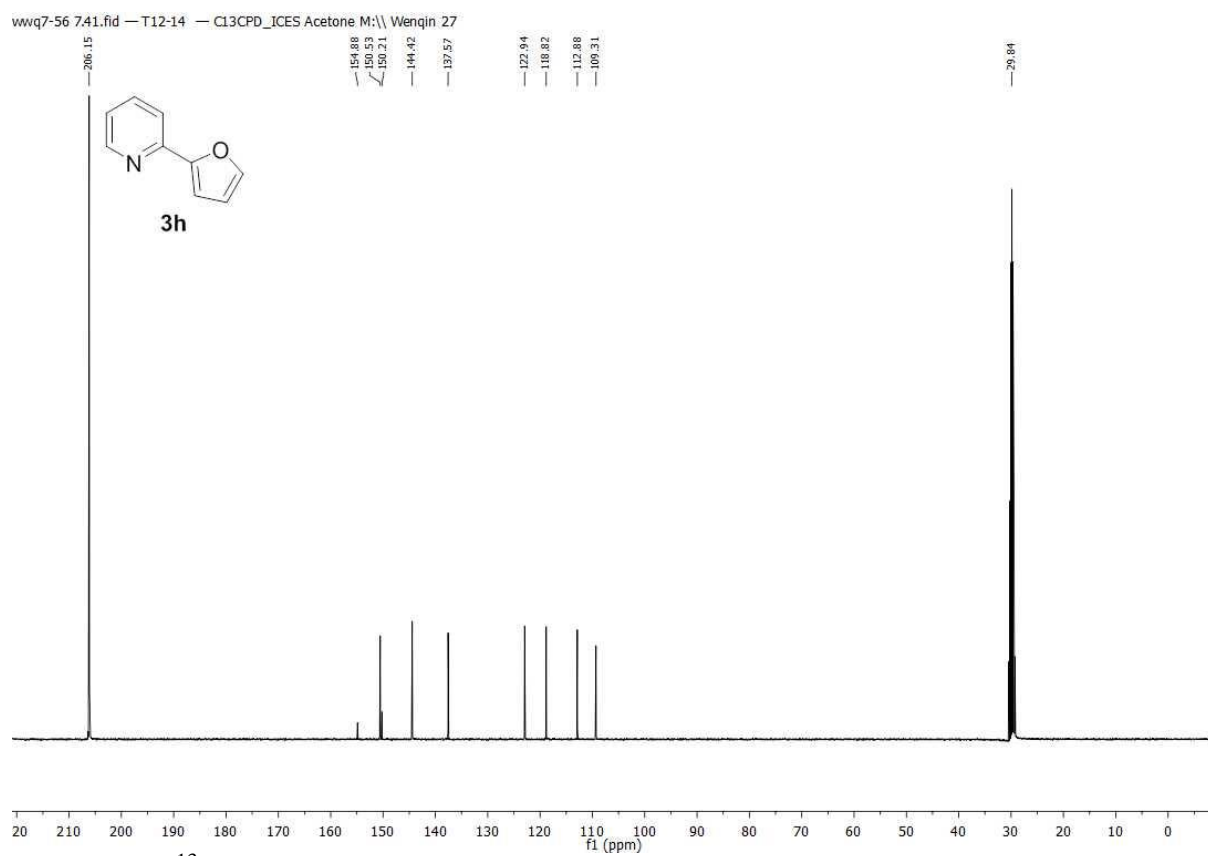

**Figure S16.**  $^{13}\text{C}$  Spectra of **3h**

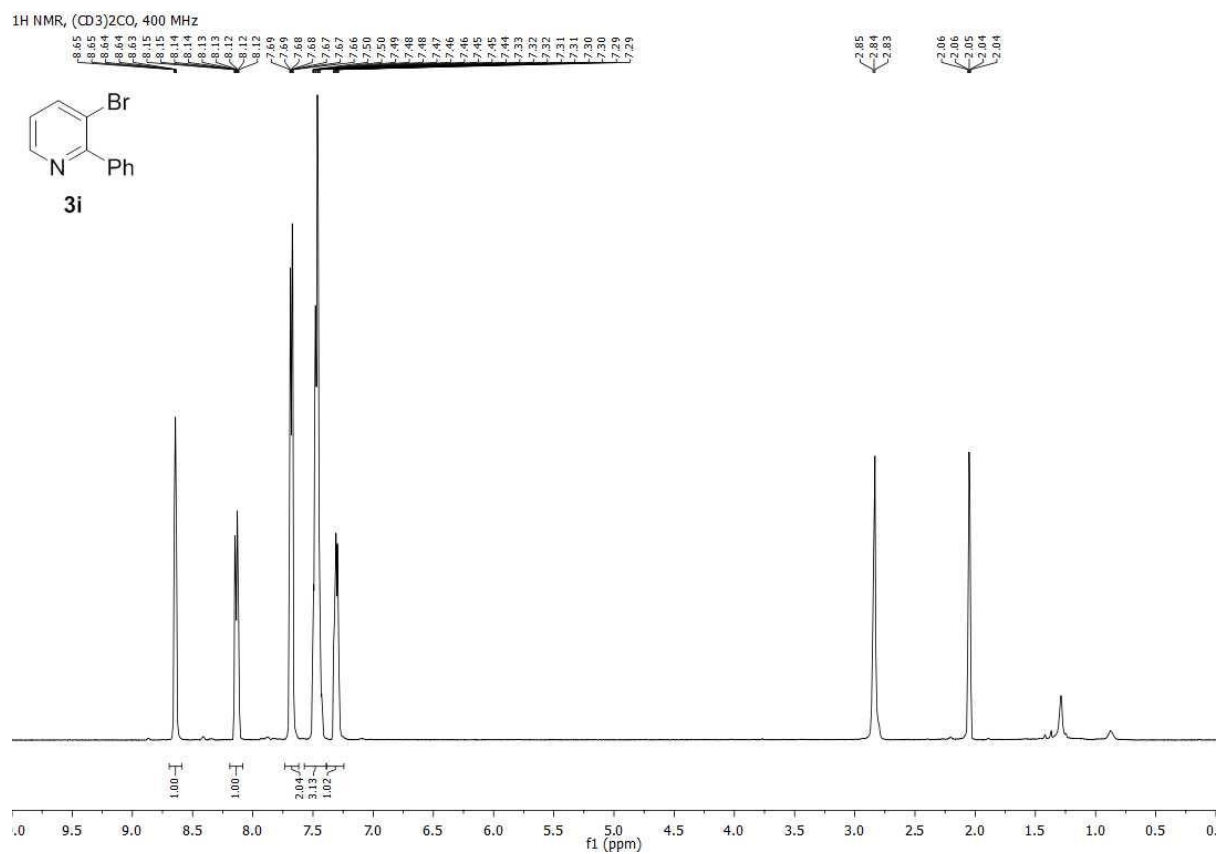

**Figure S17.** <sup>1</sup>H Spectra of **3i**

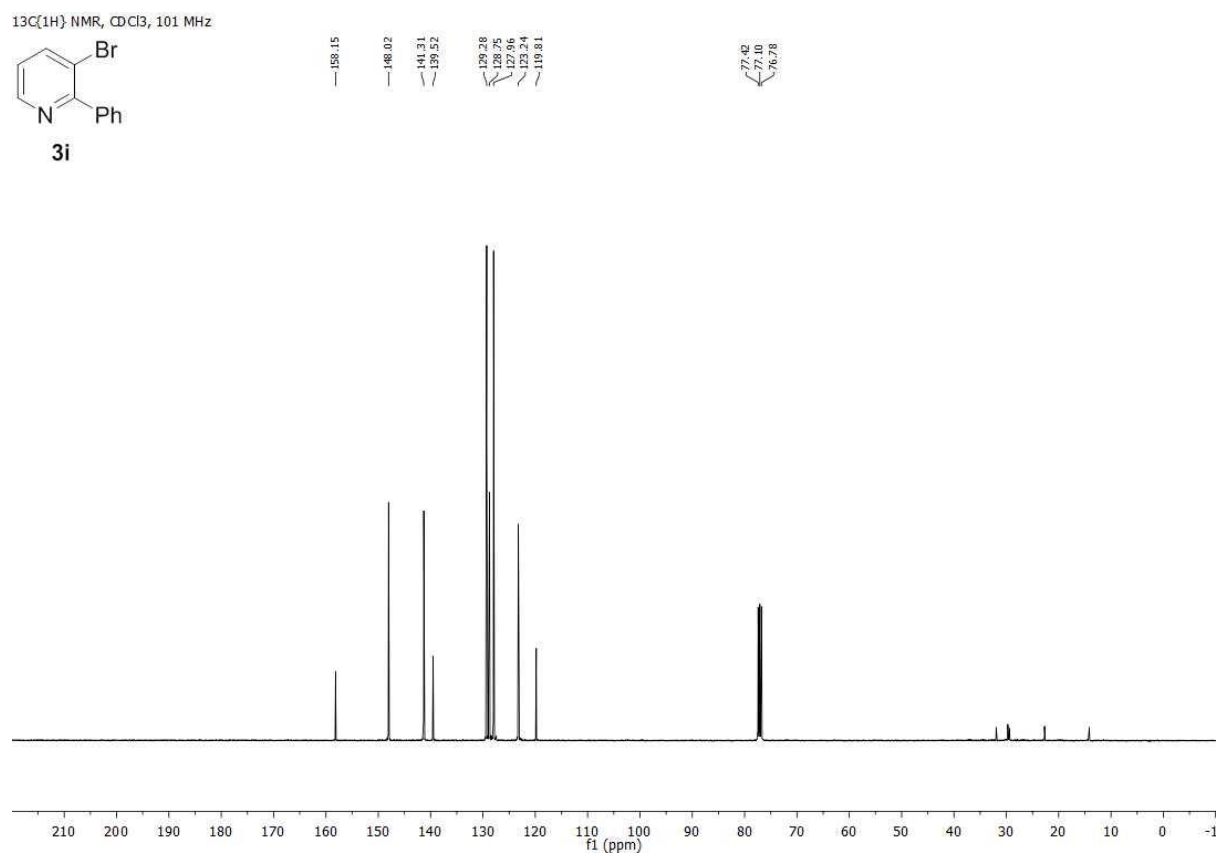

**Figure S18.** <sup>13</sup>C Spectra of **3i**

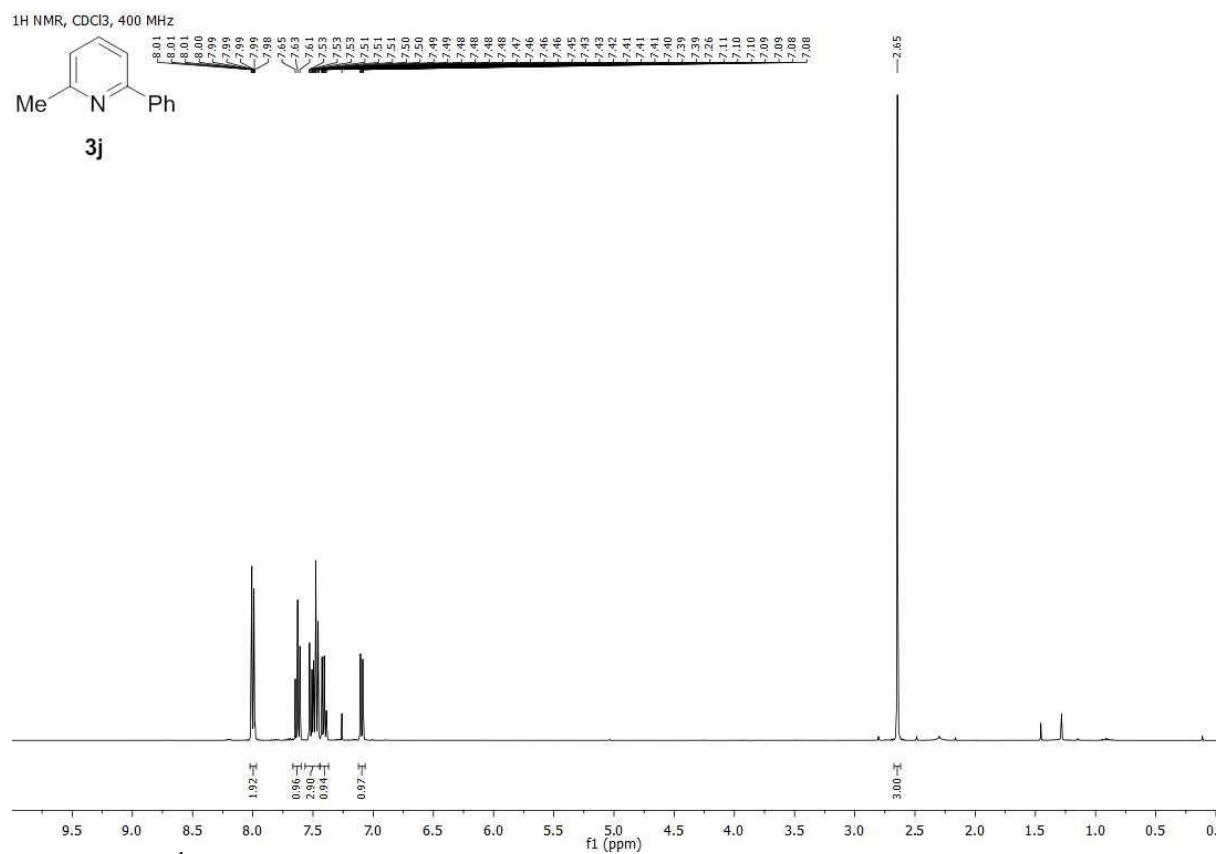

**Figure S19.** <sup>1</sup>H Spectra of **3j**

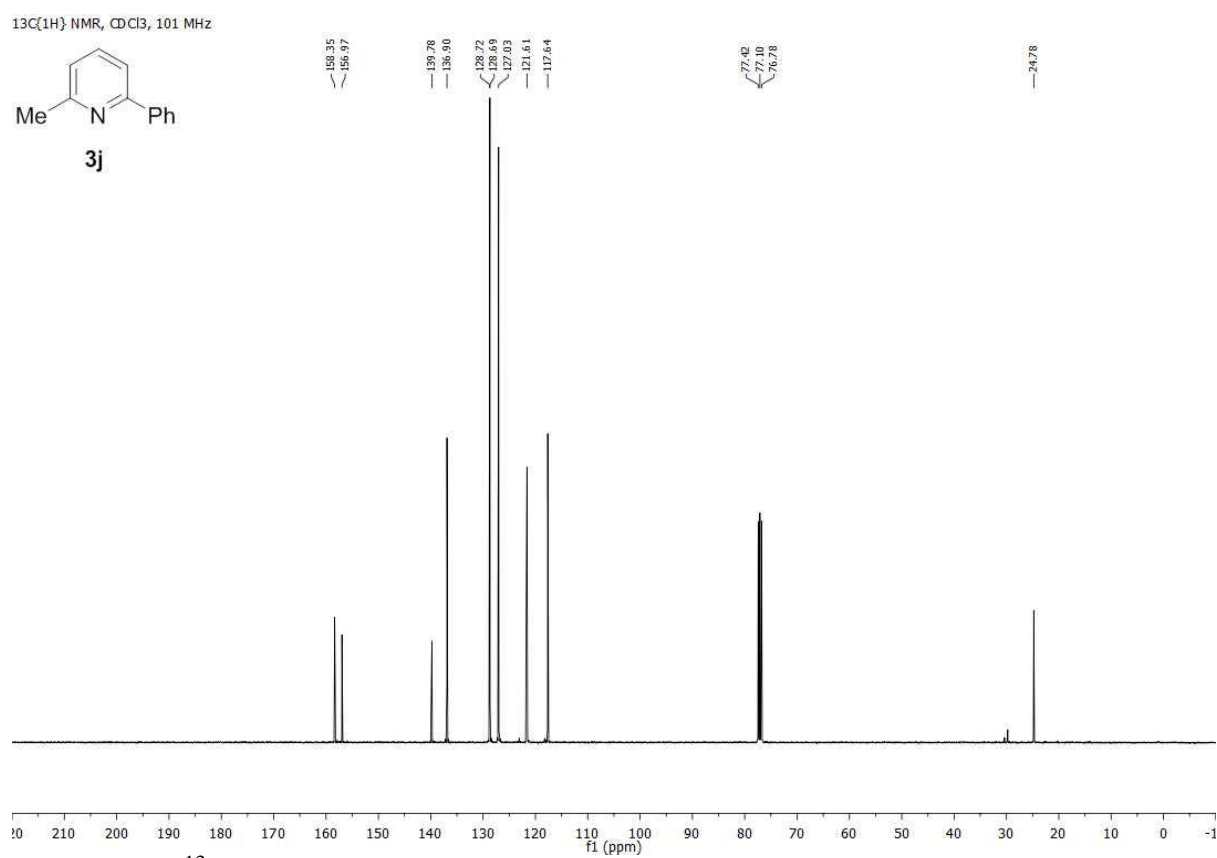

**Figure S20.** <sup>13</sup>C Spectra of **3j**

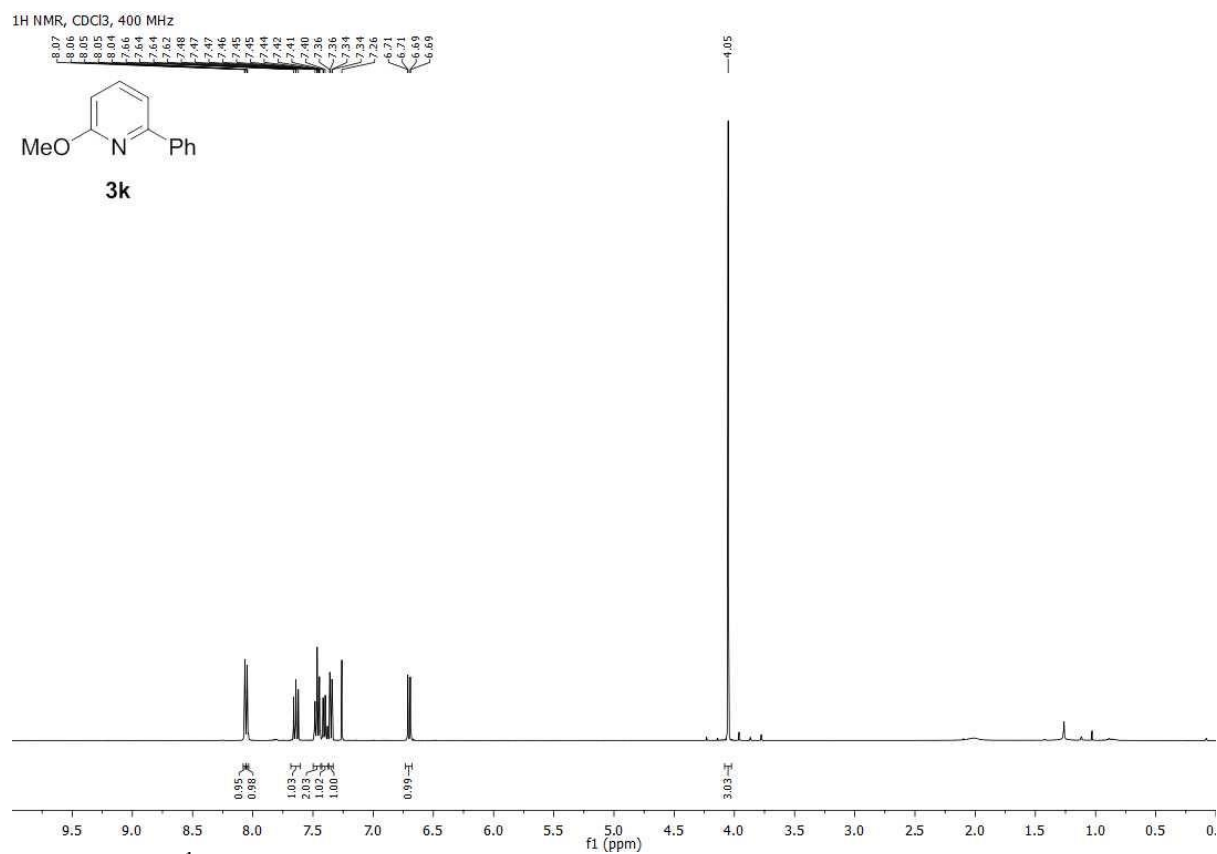

**Figure S21.** <sup>1</sup>H Spectra of **3k**

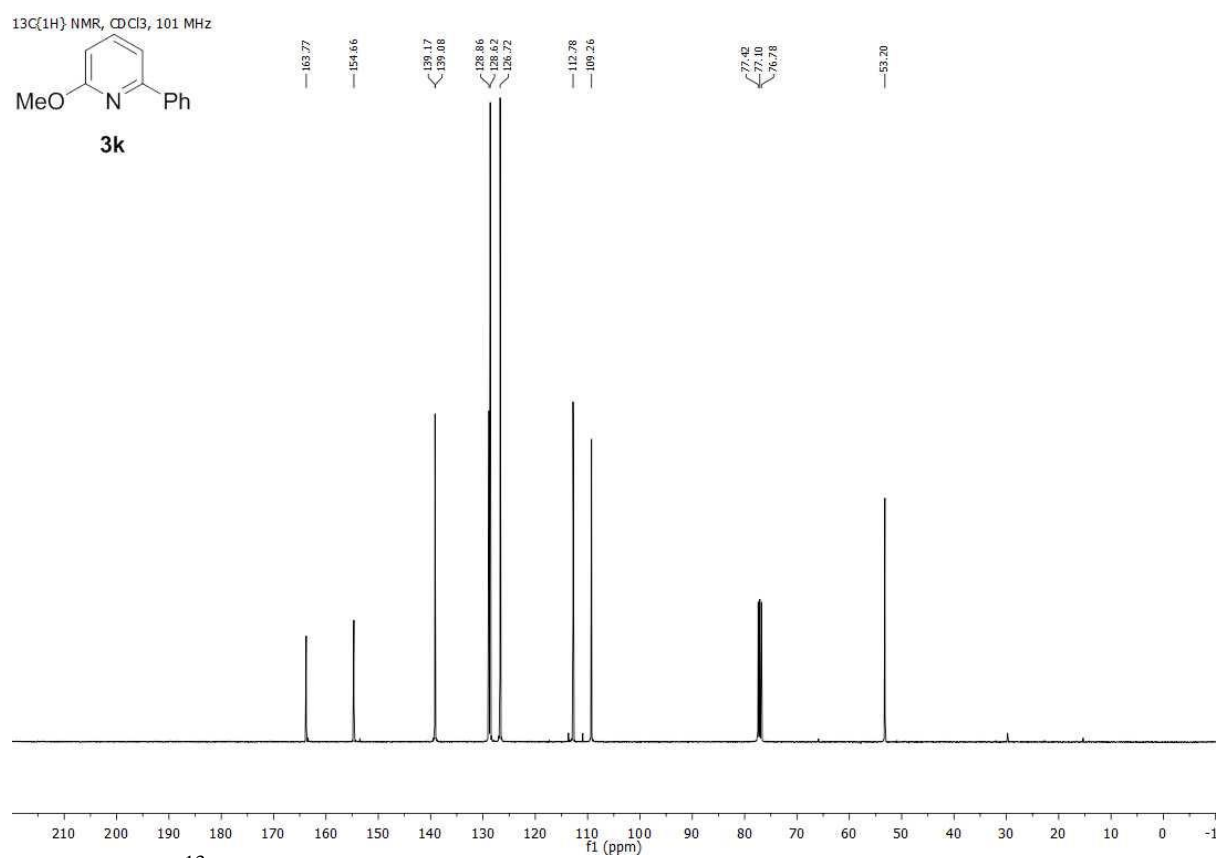

**Figure S22.** <sup>13</sup>C Spectra of **3k**



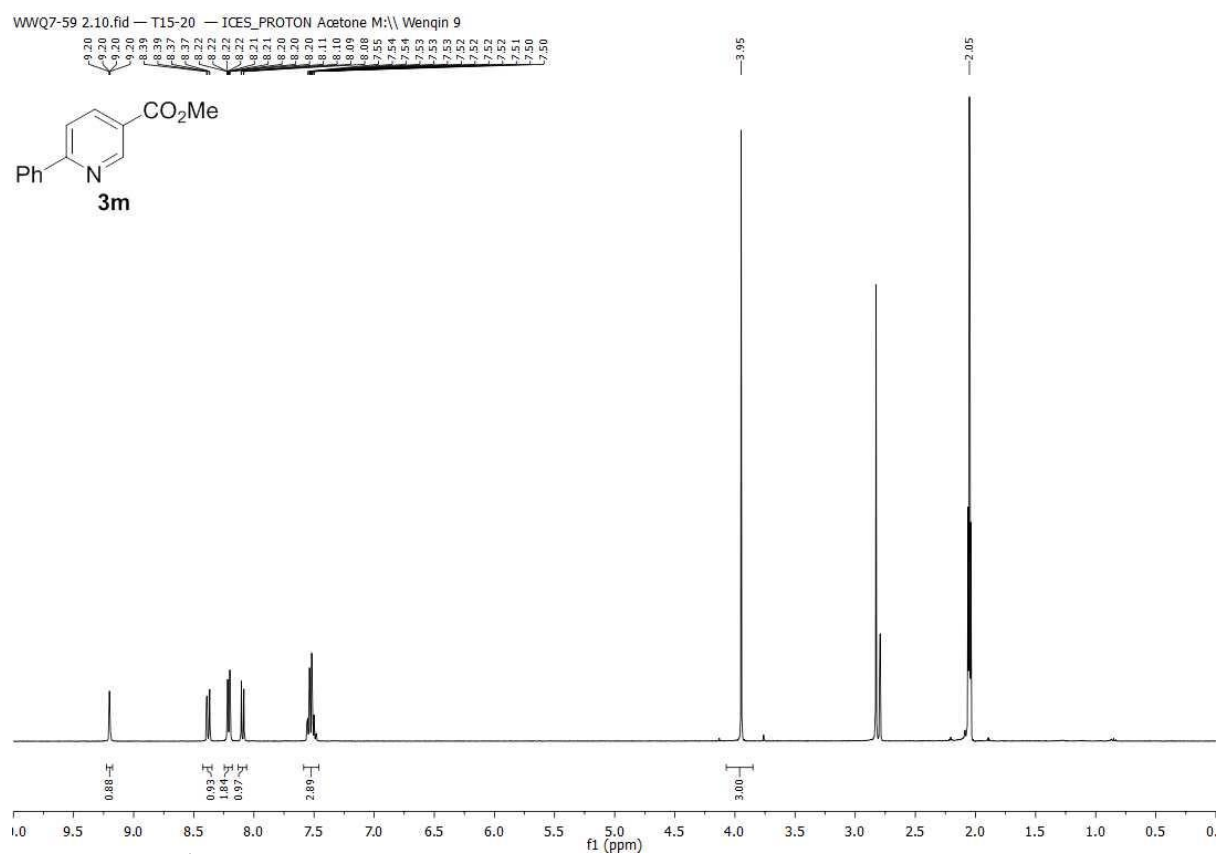

**Figure S25.**  $^1\text{H}$  Spectra of **3m**

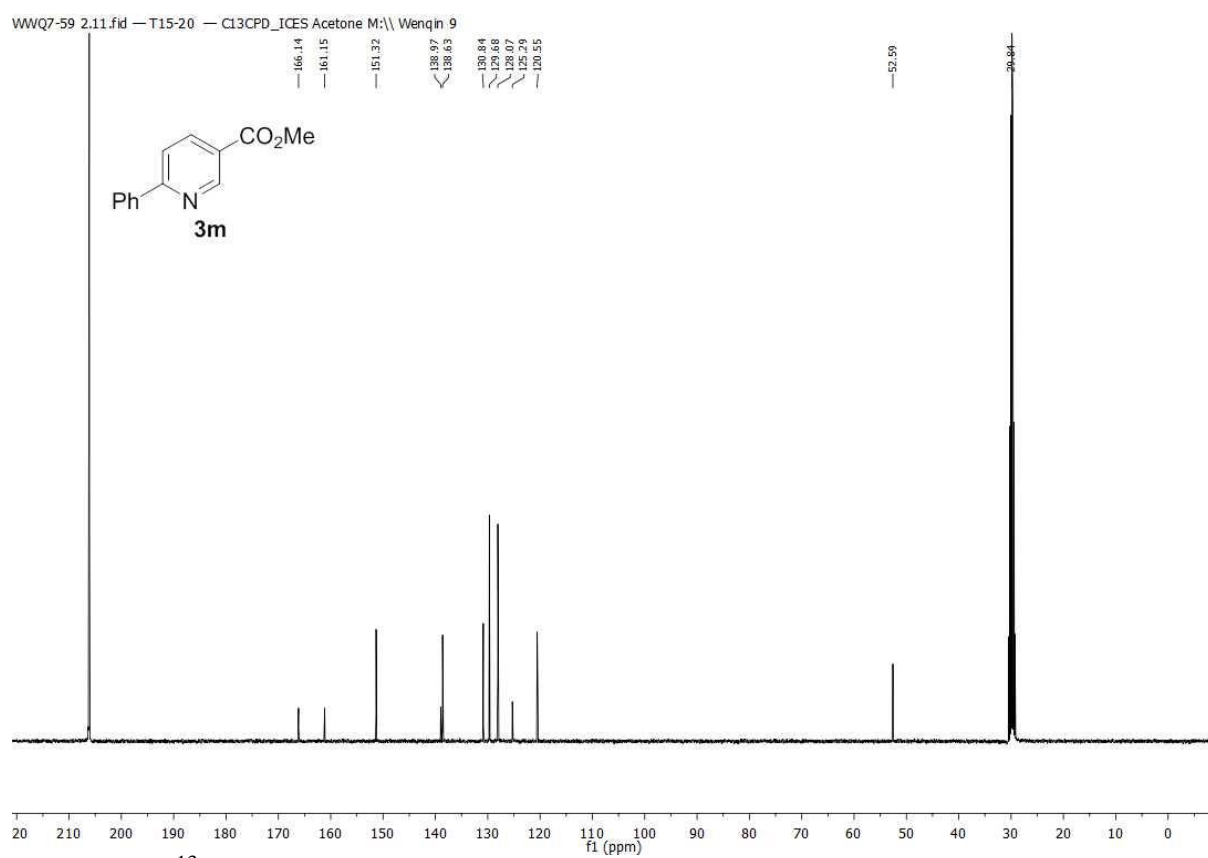

**Figure S26.**  $^{13}\text{C}$  Spectra of **3m**

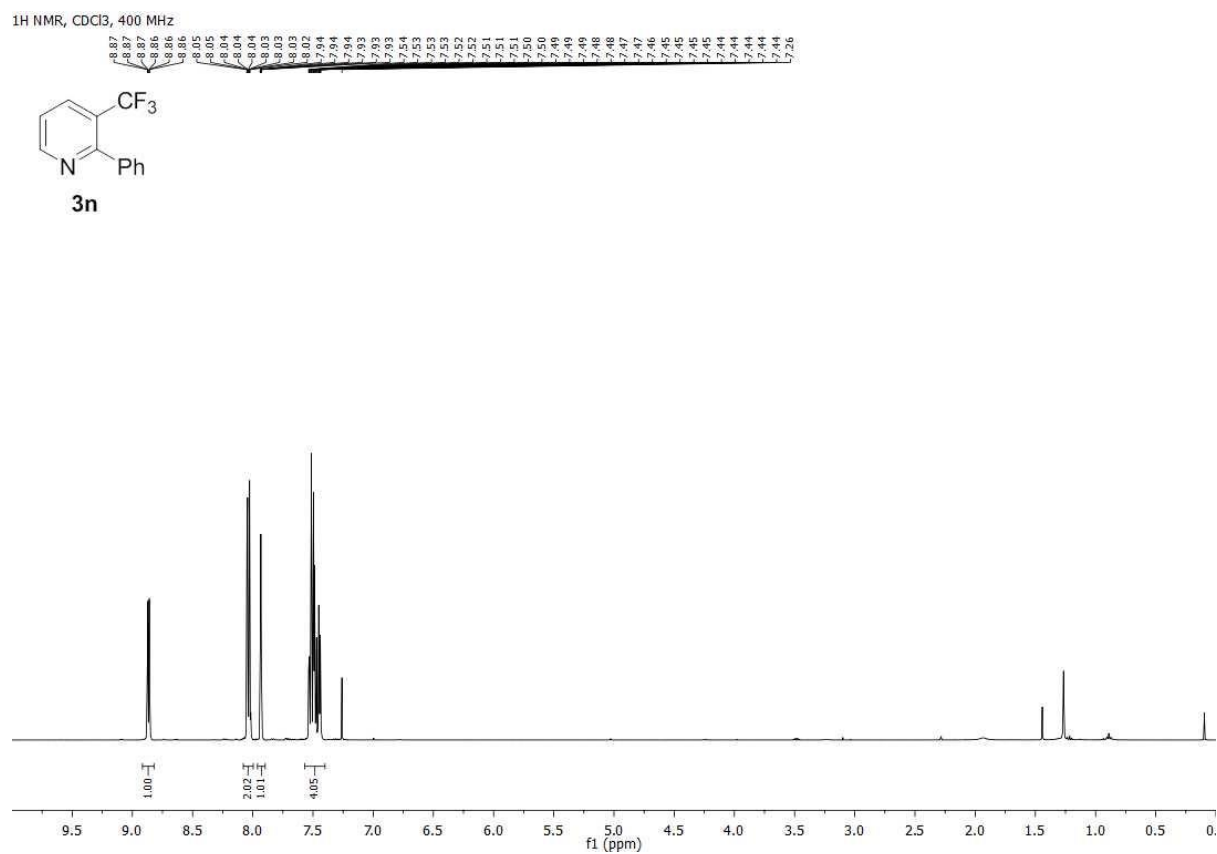

**Figure S27.** <sup>1</sup>H Spectra of **3n**

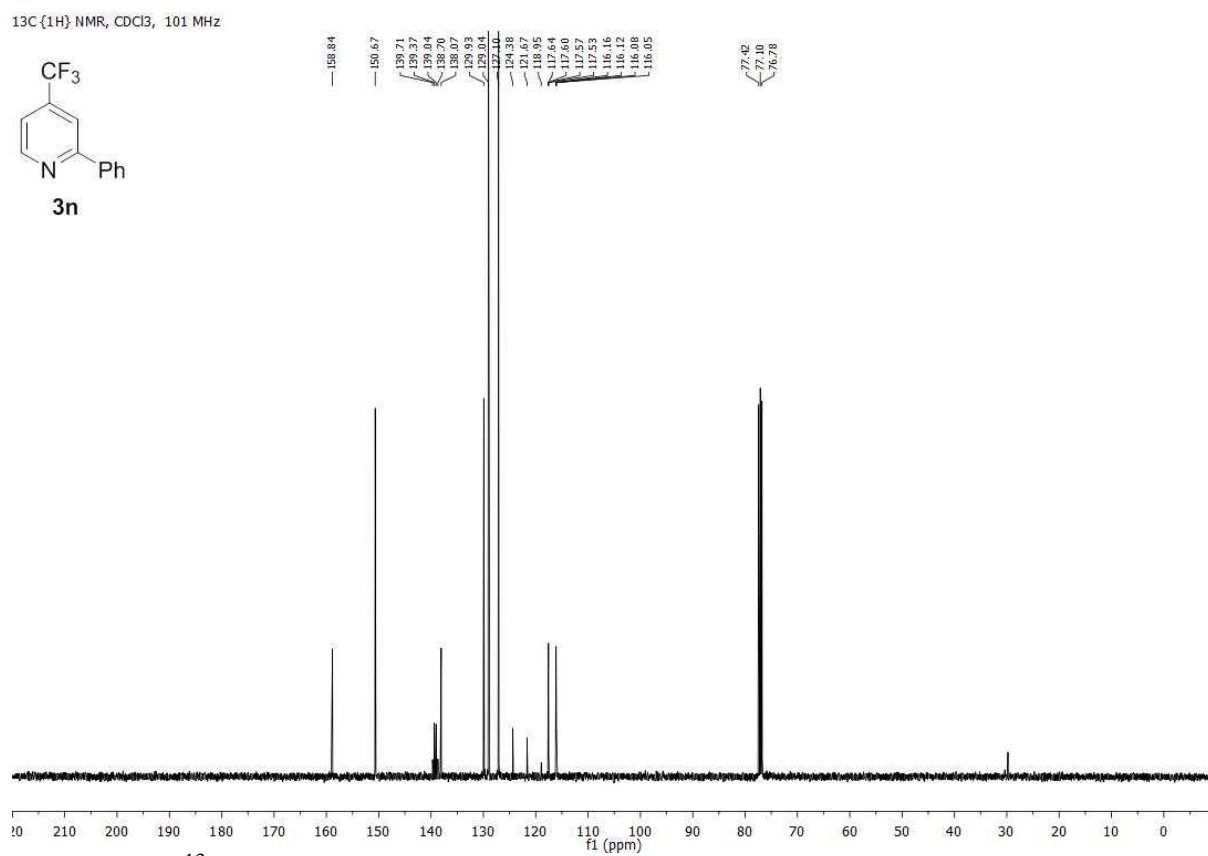

**Figure S28.** <sup>13</sup>C Spectra of **3n**



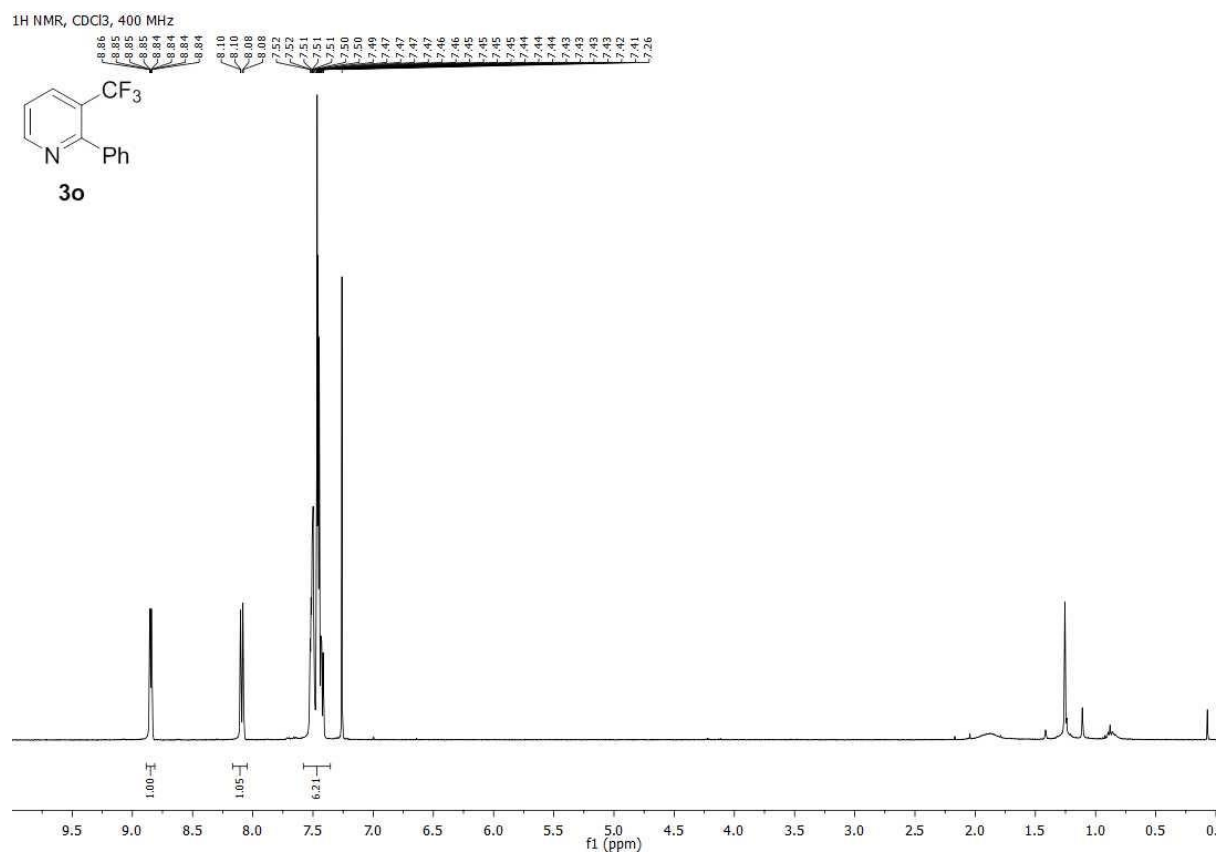

**Figure S29.** <sup>1</sup>H Spectra of **3o**

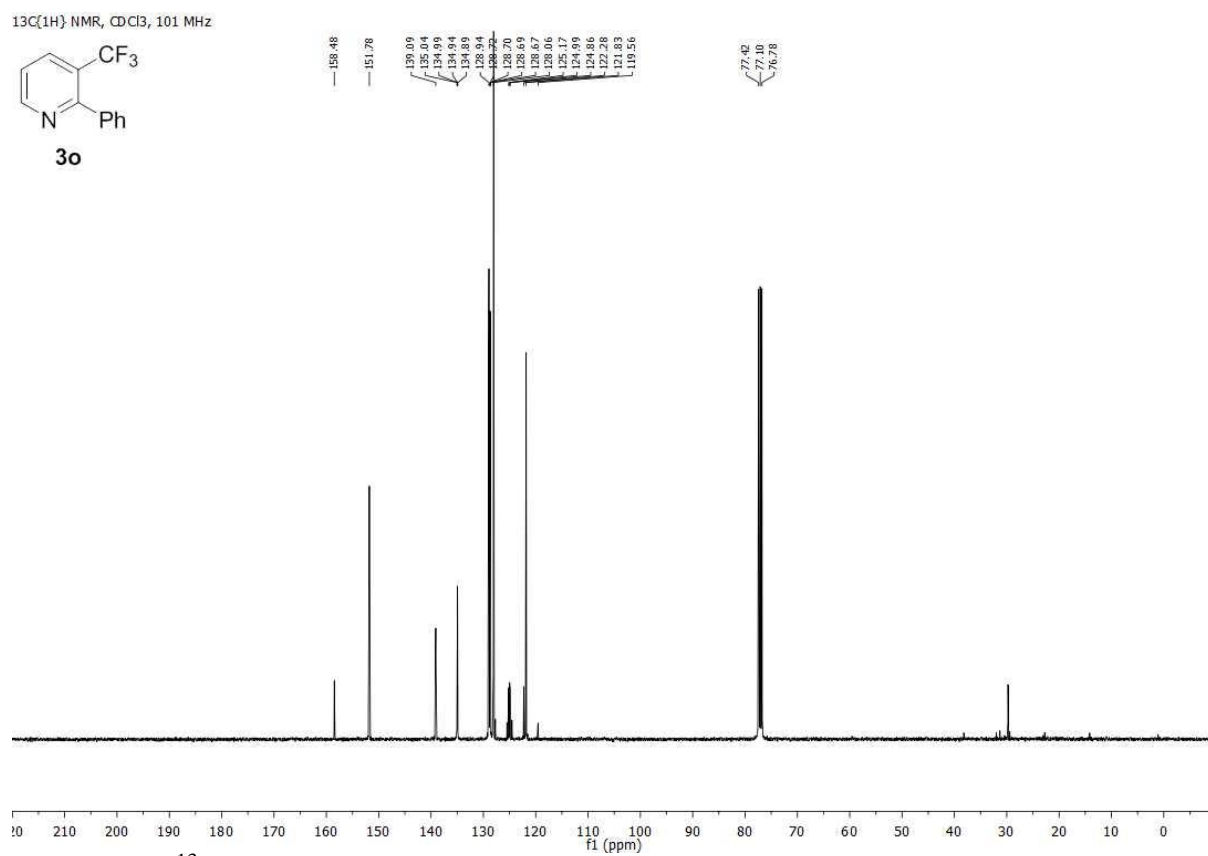

**Figure S30.** <sup>13</sup>C Spectra of **3o**

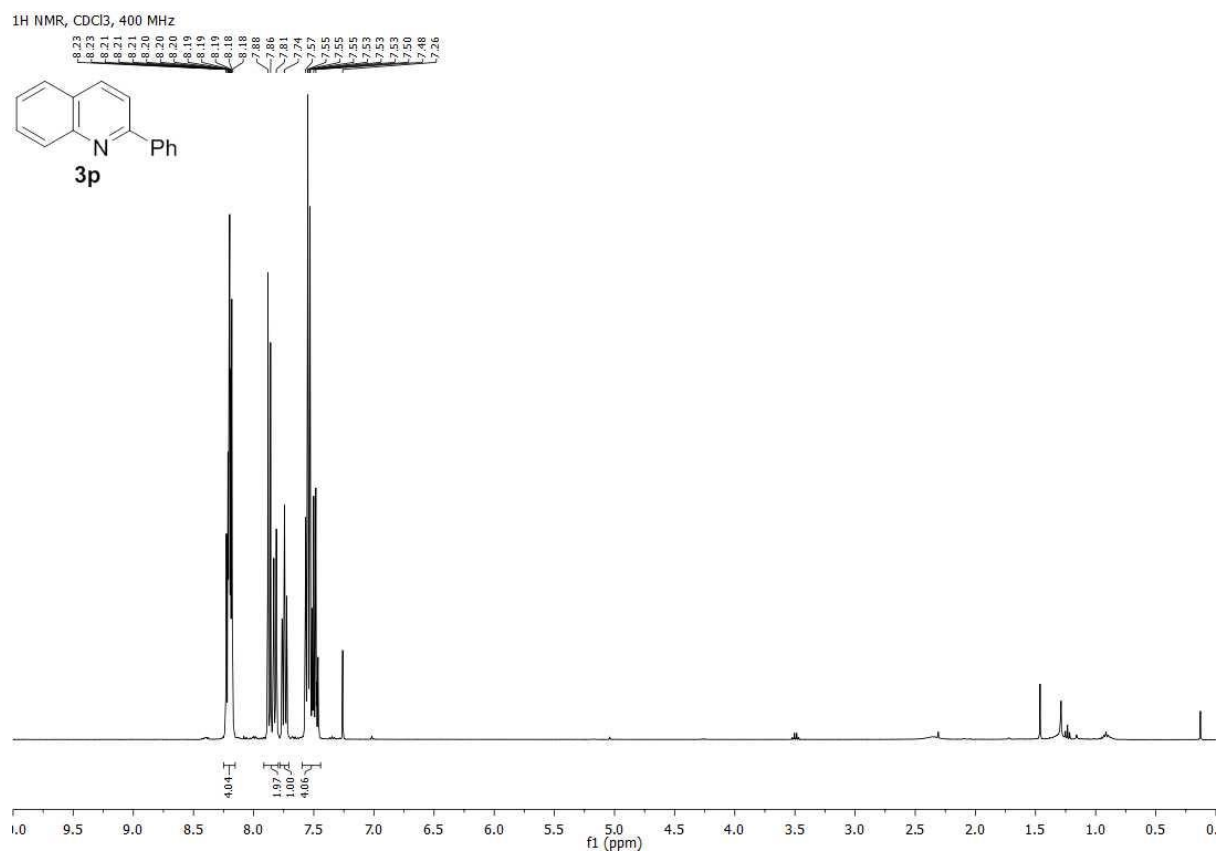

**Figure S31.** <sup>1</sup>H Spectra of **3p**

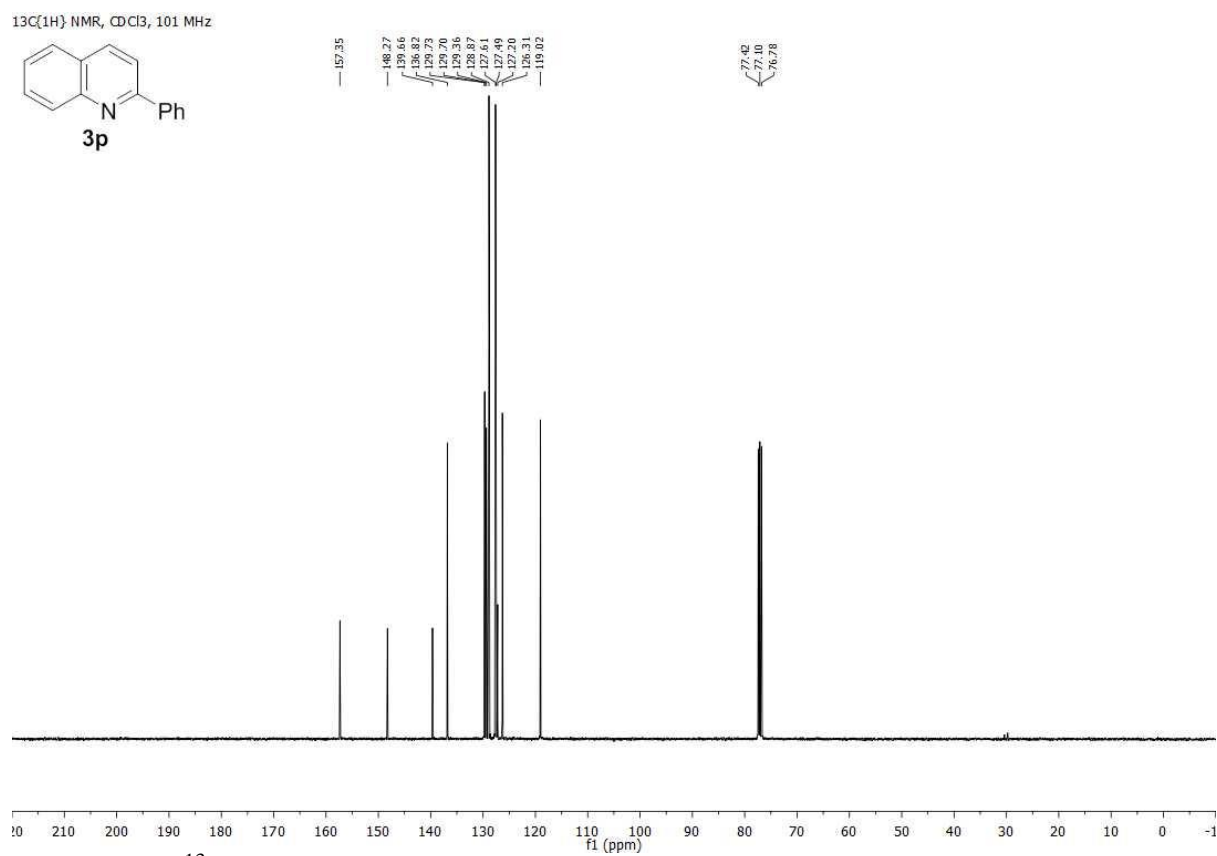

**Figure S32.** <sup>13</sup>C Spectra of **3p**

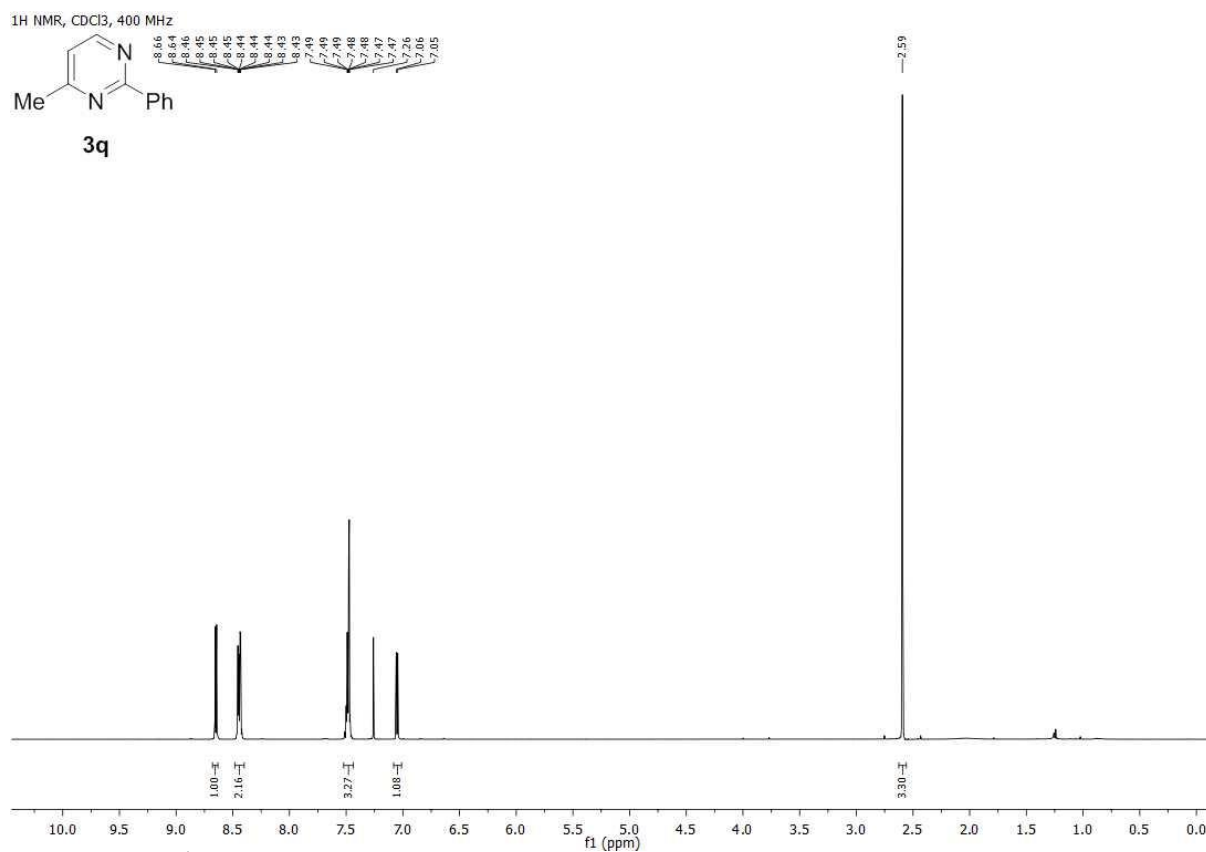

**Figure S33.** <sup>1</sup>H Spectra of **3q**

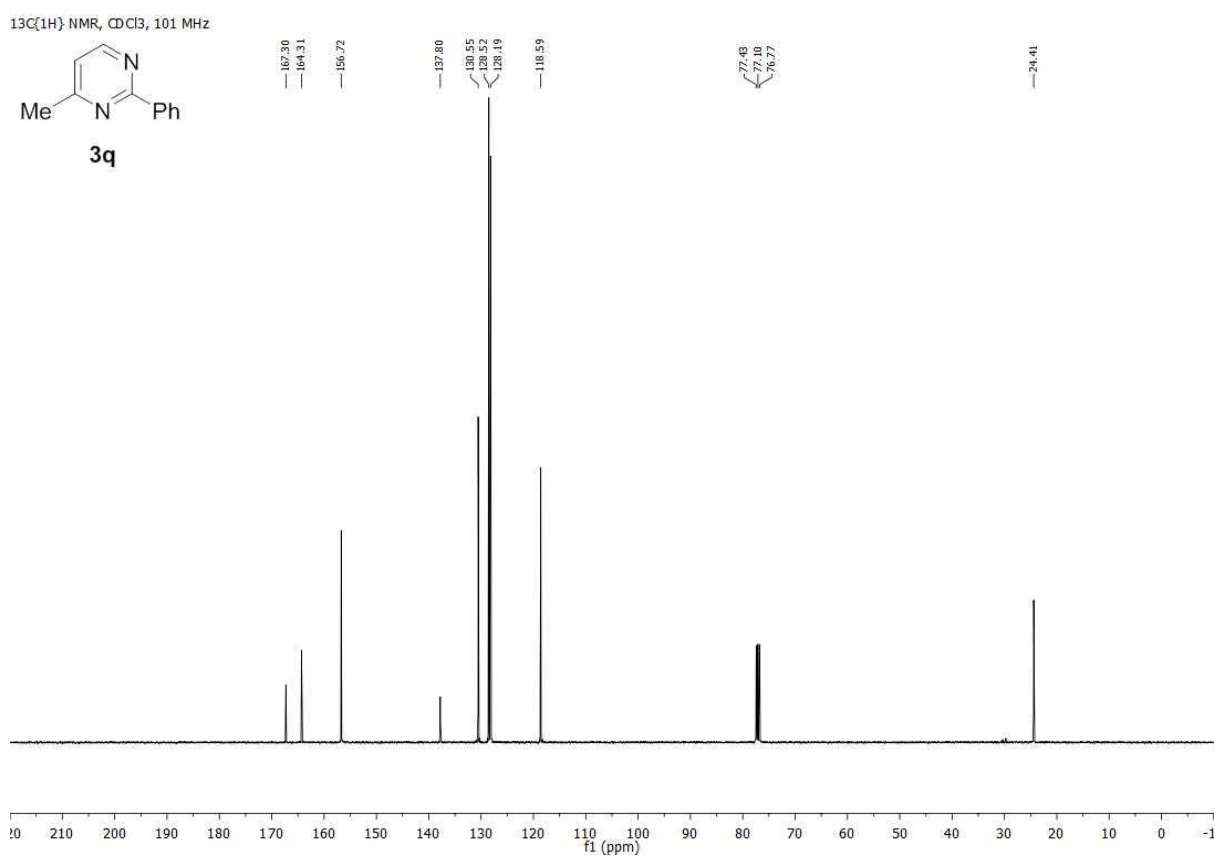

**Figure S34.** <sup>13</sup>C Spectra of **3q**

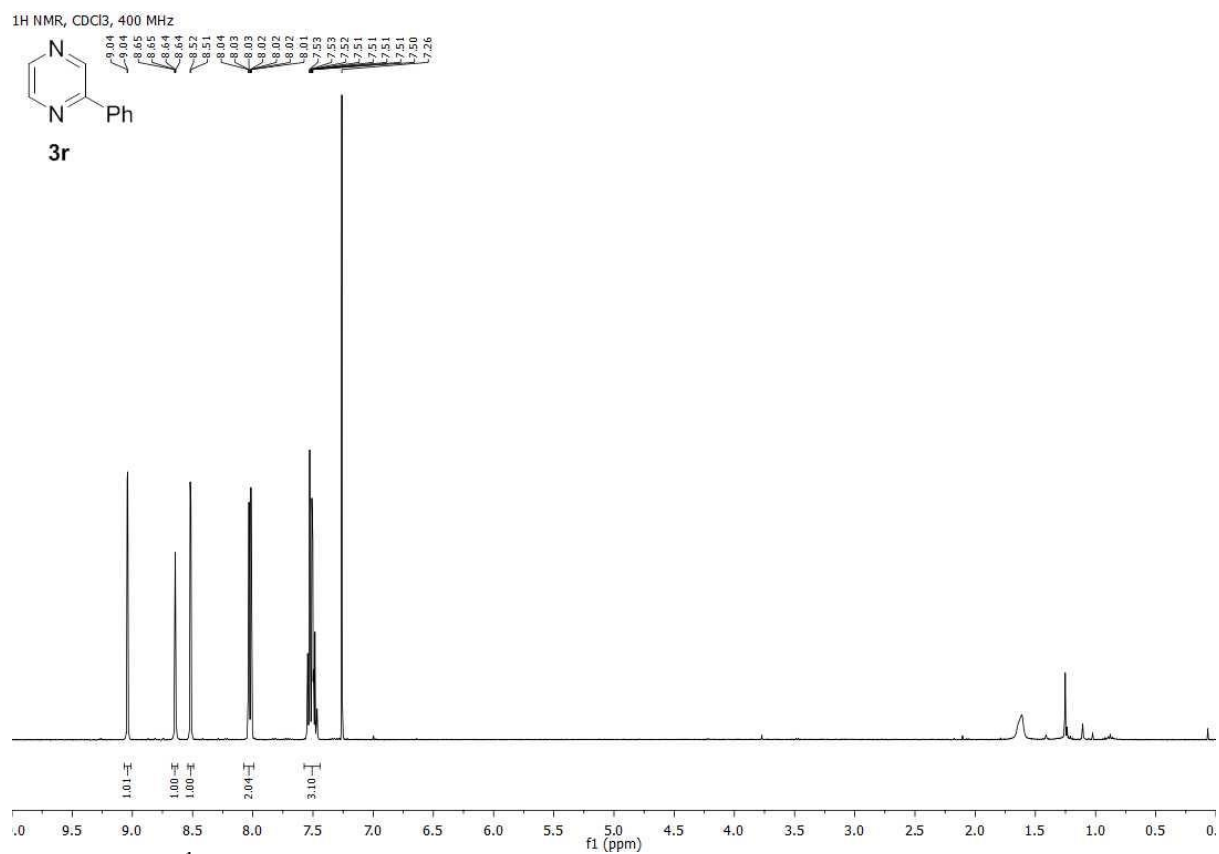

**Figure S35.** <sup>1</sup>H Spectra of **3r**

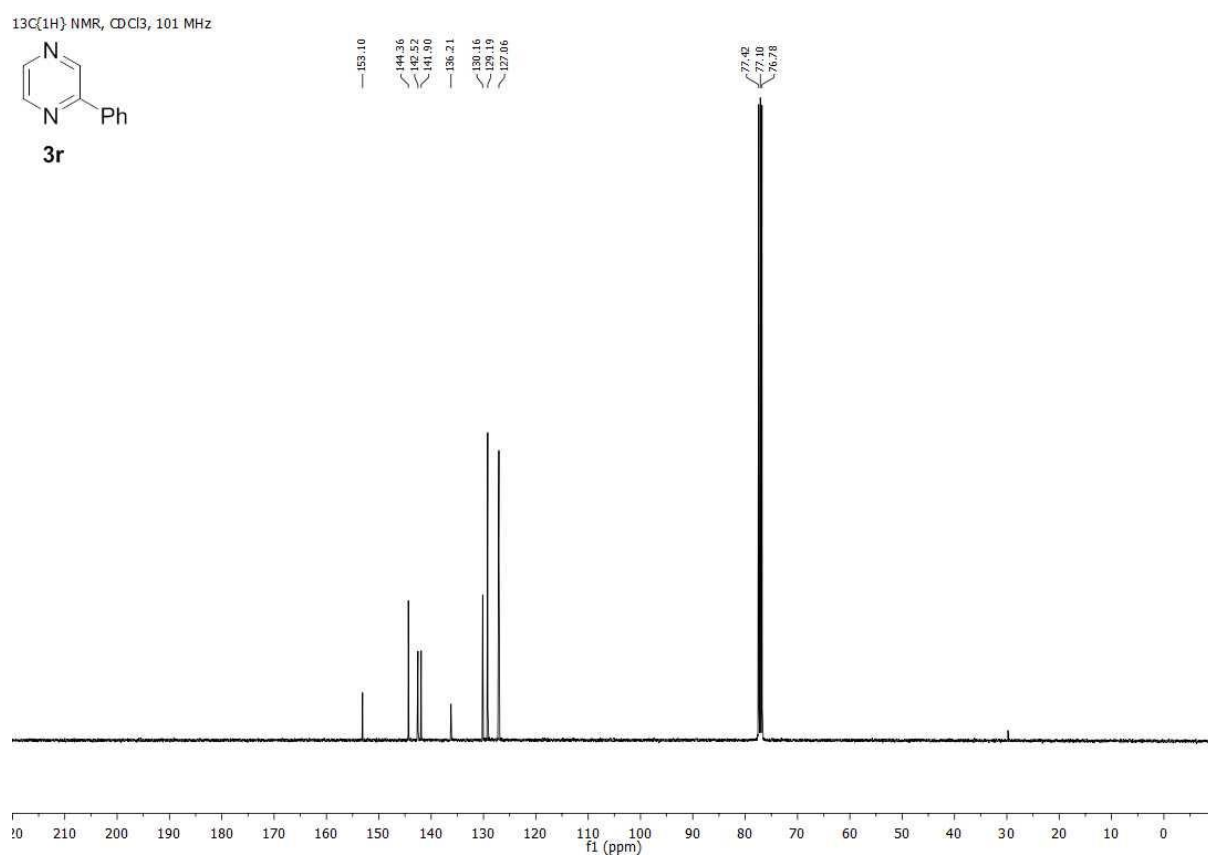

**Figure S36.** <sup>13</sup>C Spectra of **3r**

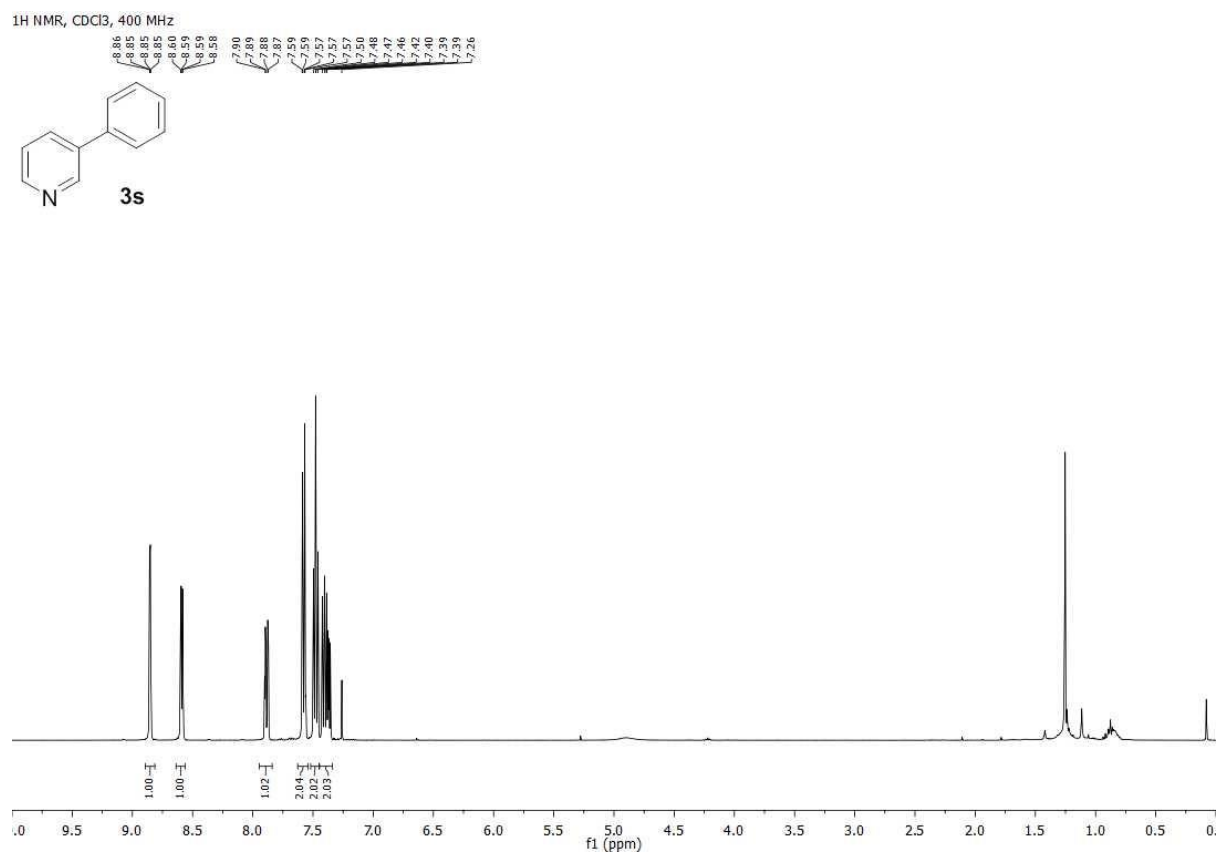

**Figure S37.** <sup>1</sup>H Spectra of **3s**

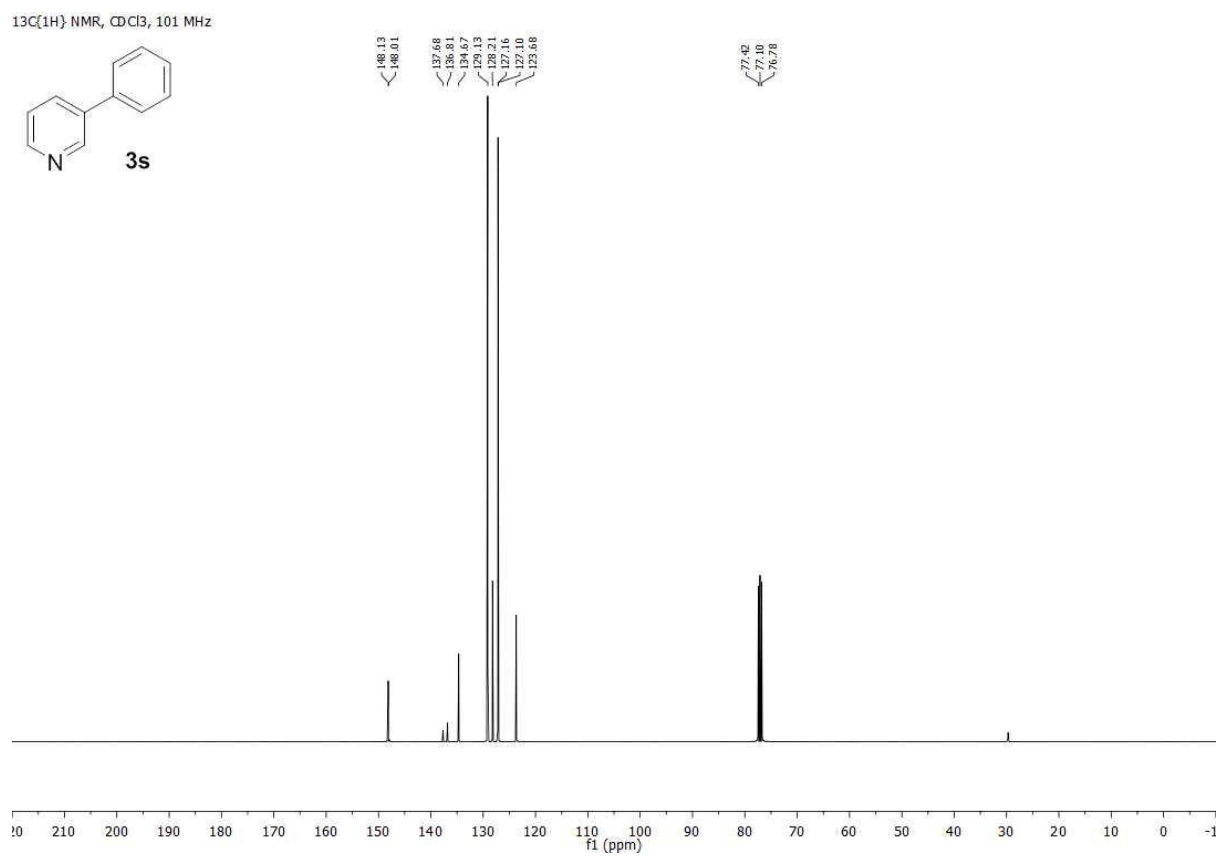

**Figure S38.** <sup>13</sup>C Spectra of **3s**

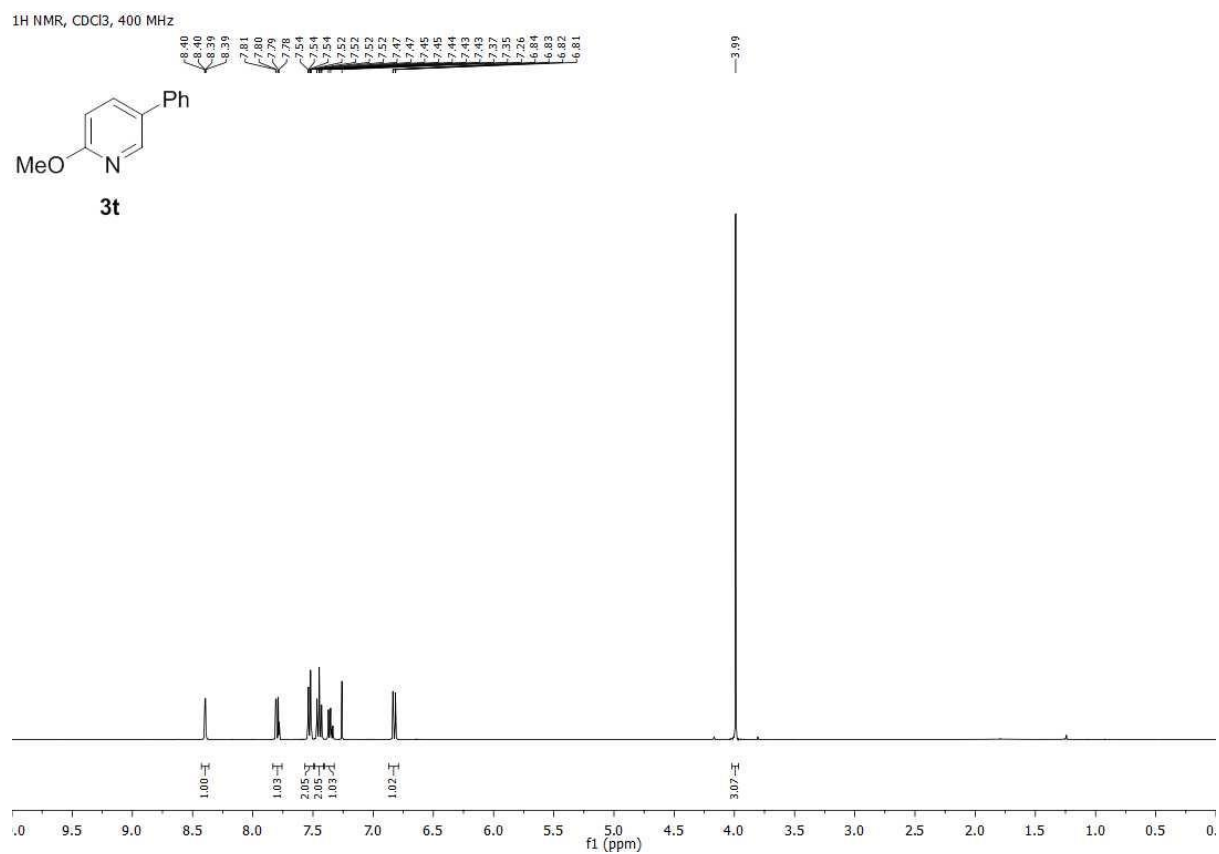

**Figure S39.** <sup>1</sup>H Spectra of **3t**

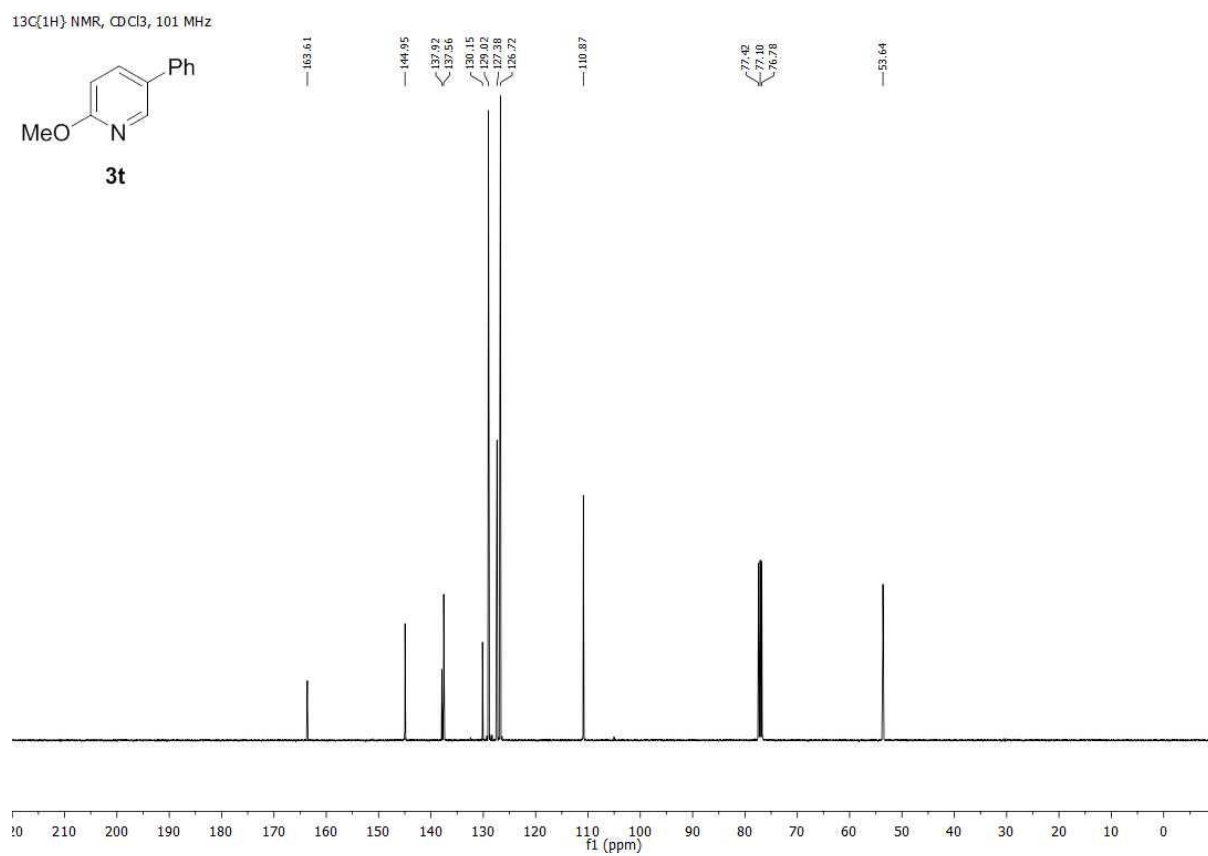

**Figure S40.** <sup>13</sup>C Spectra of **3t**

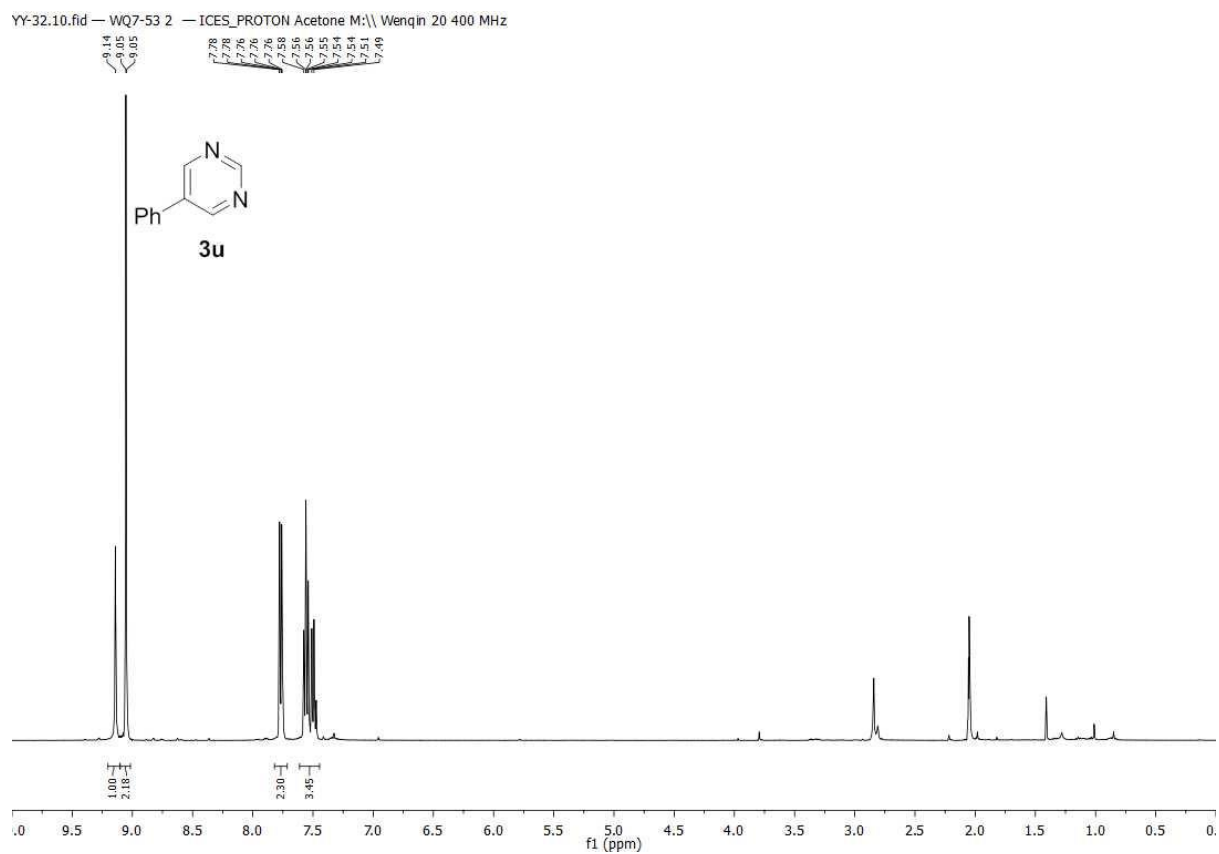

**Figure S41.**  $^1\text{H}$  Spectra of **3u**

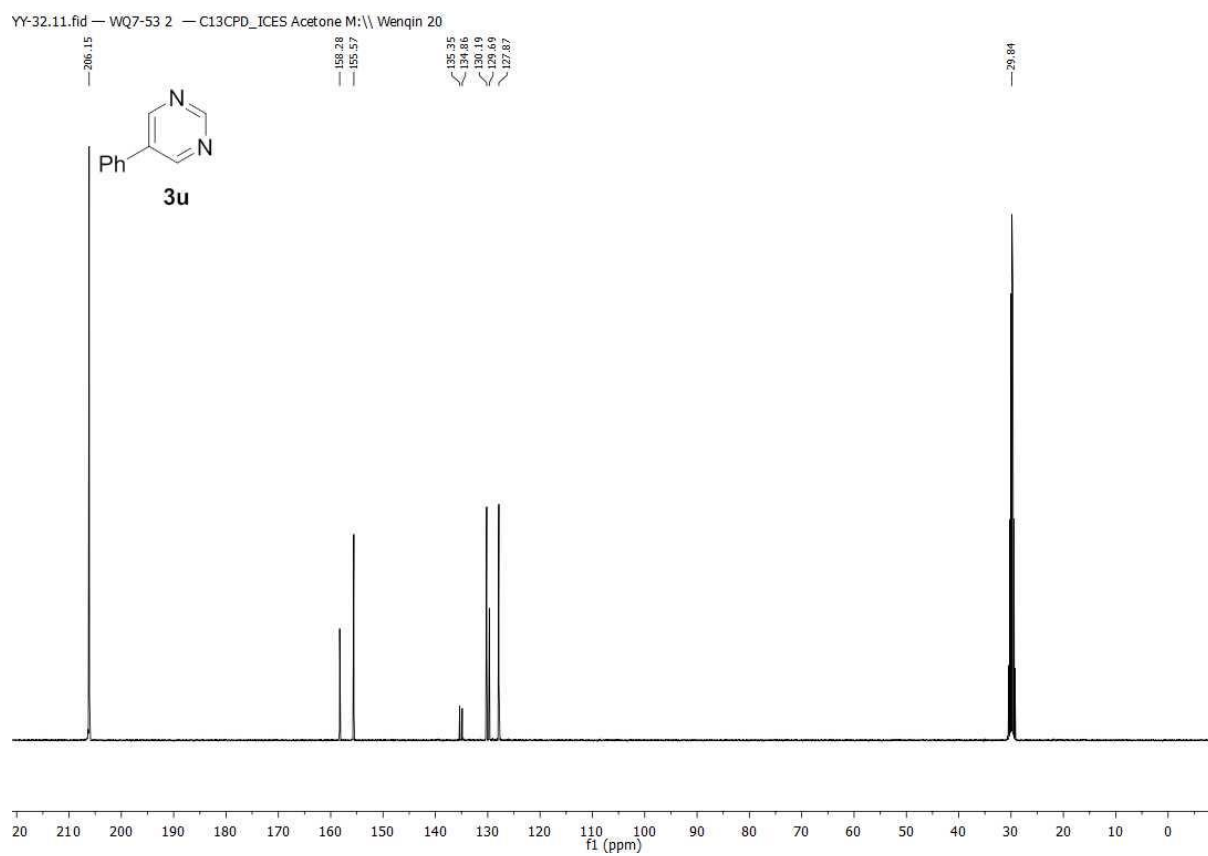

**Figure S42.**  $^{13}\text{C}$  Spectra of **3u**

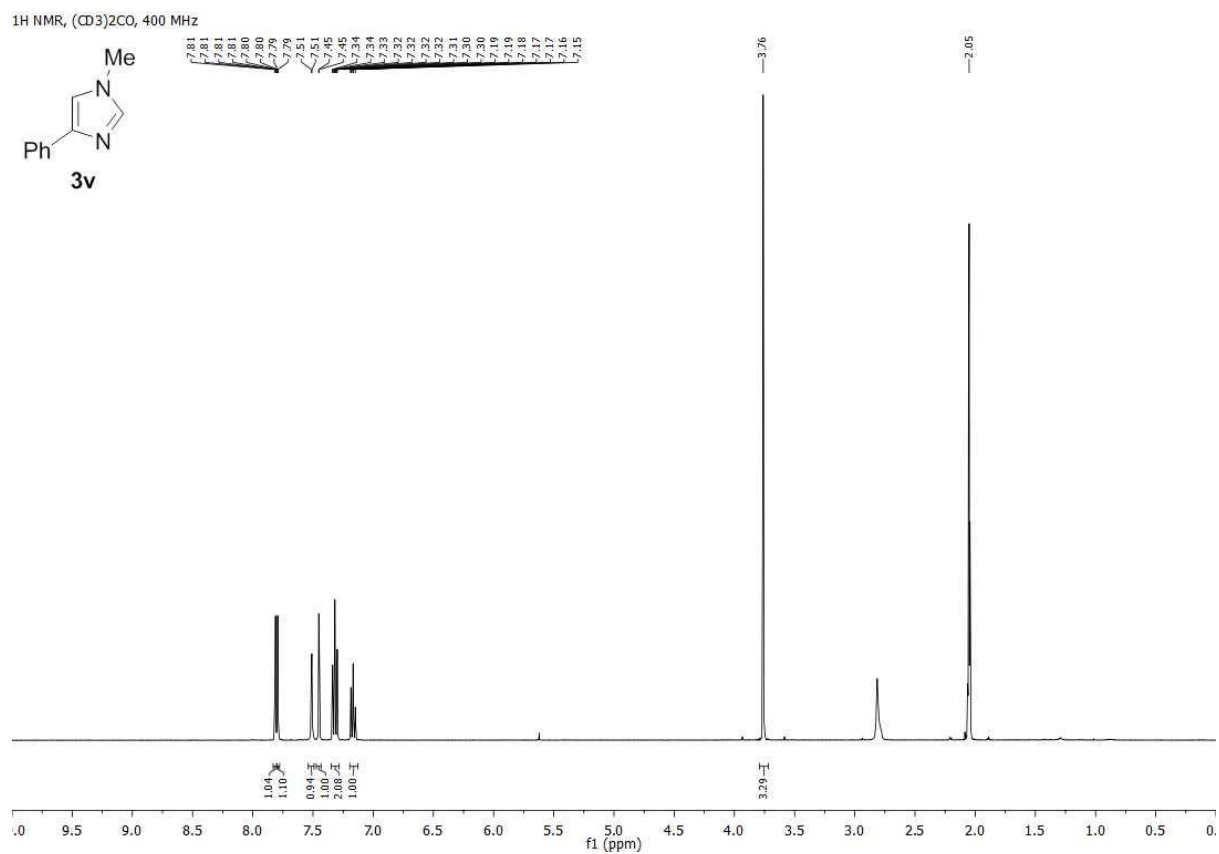

**Figure S43.** <sup>1</sup>H Spectra of **3v**

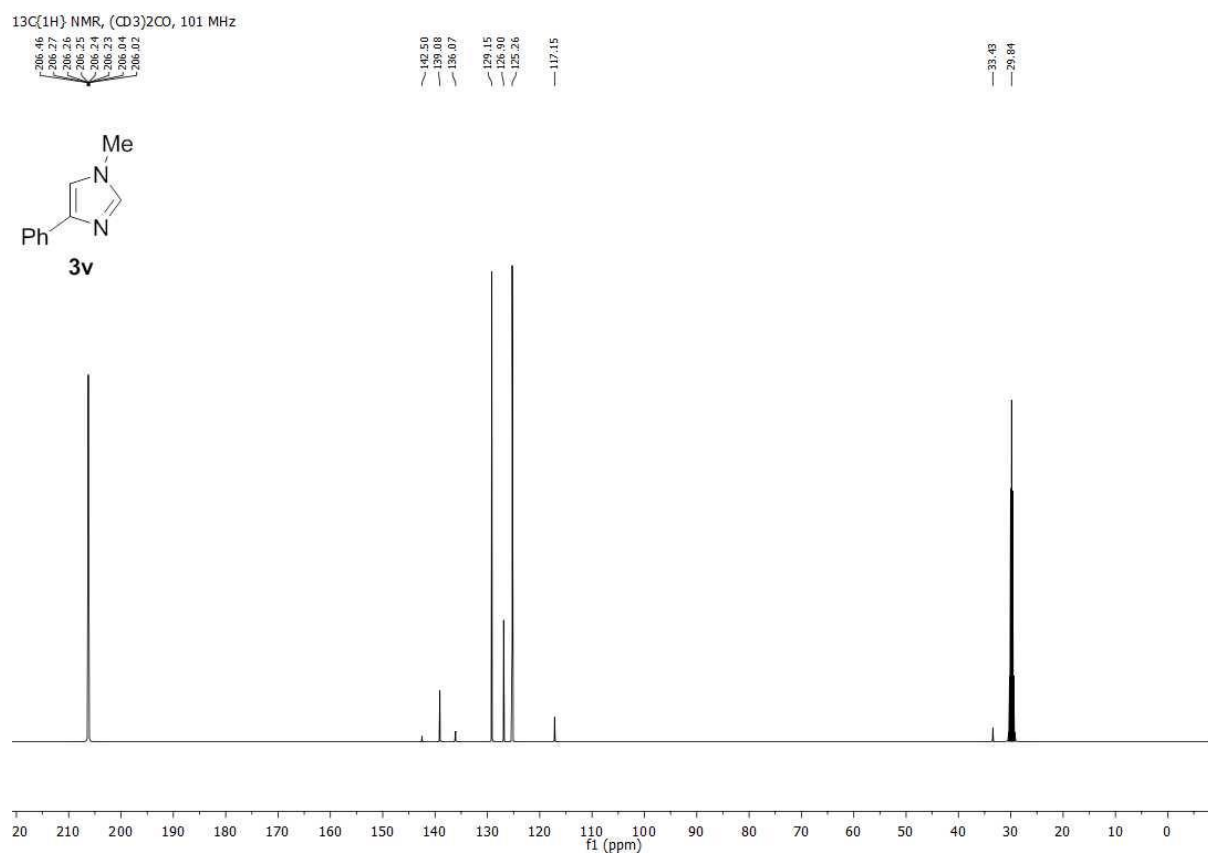

**Figure S44.** <sup>13</sup>C Spectra of **3v**



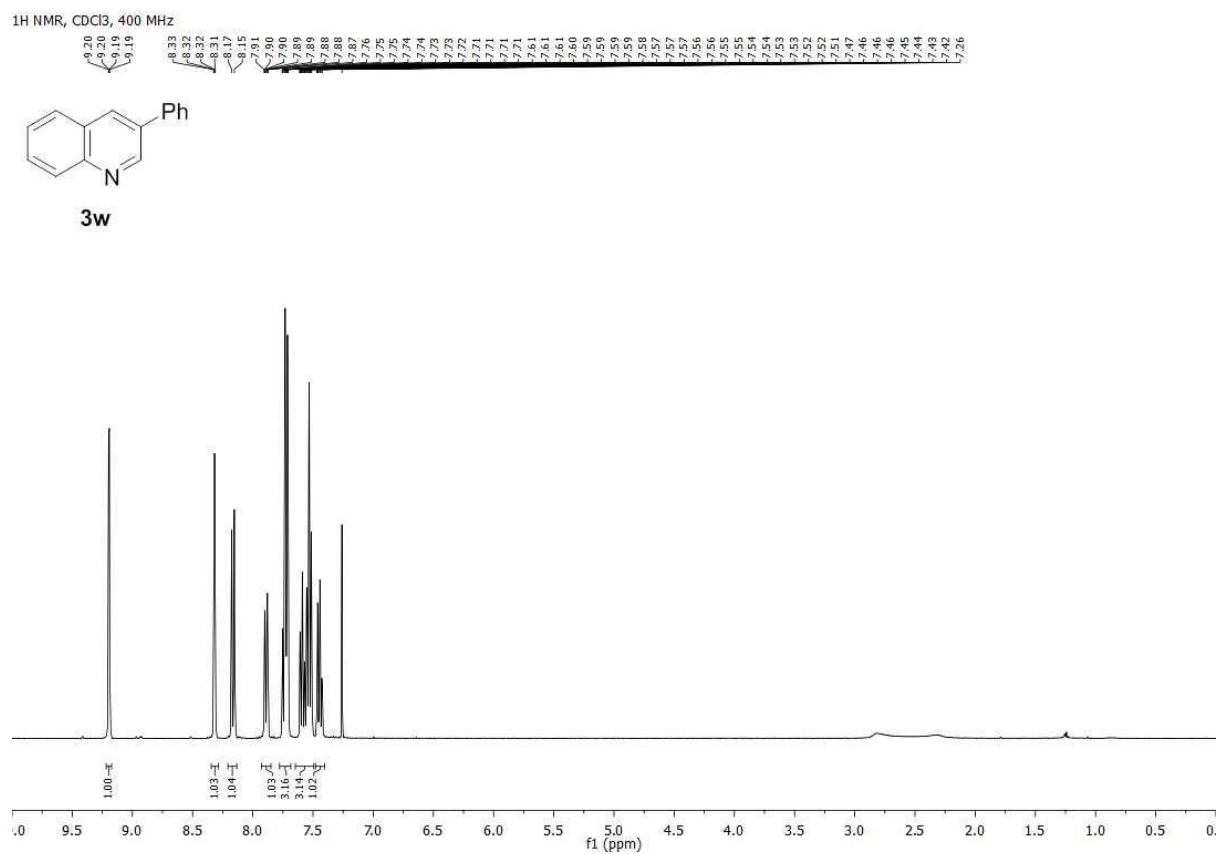

**Figure S45.** <sup>1</sup>H Spectra of **3w**

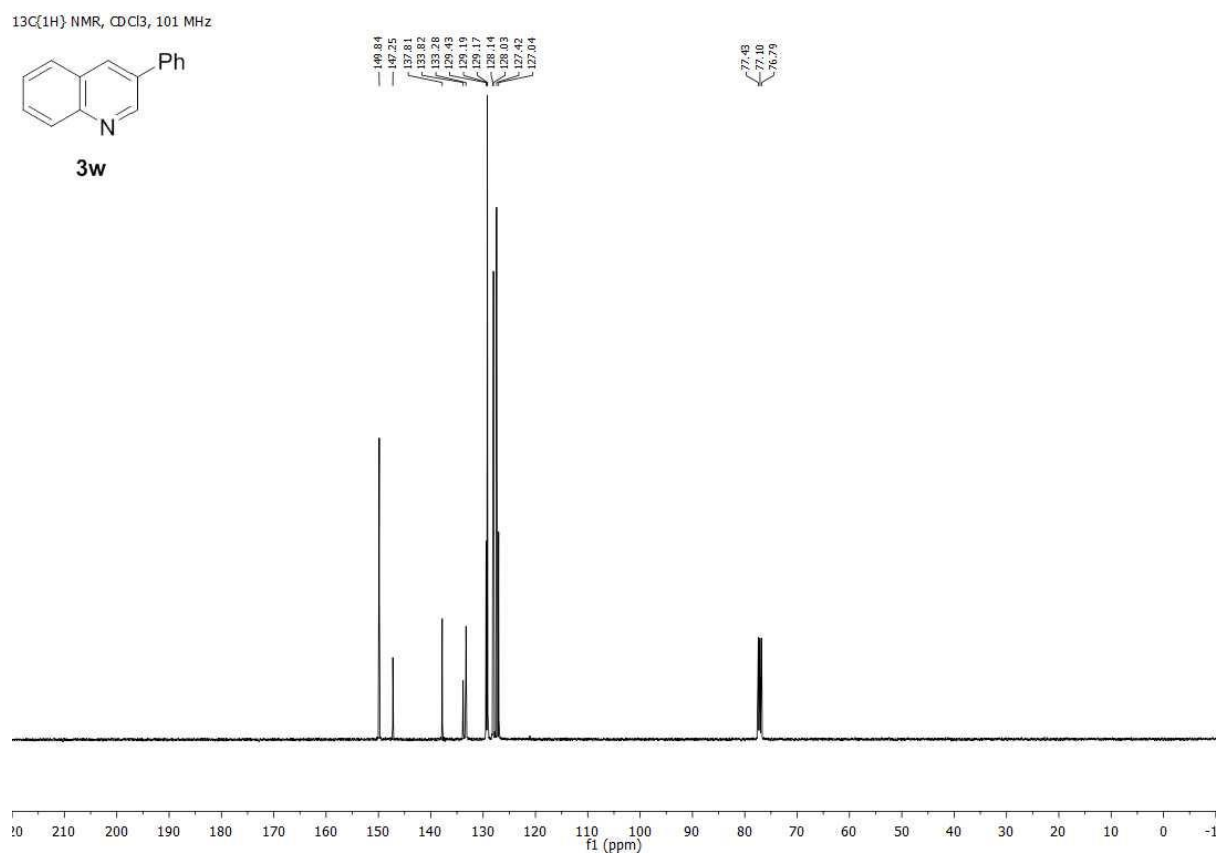

**Figure S46.** <sup>13</sup>C Spectra of **3w**

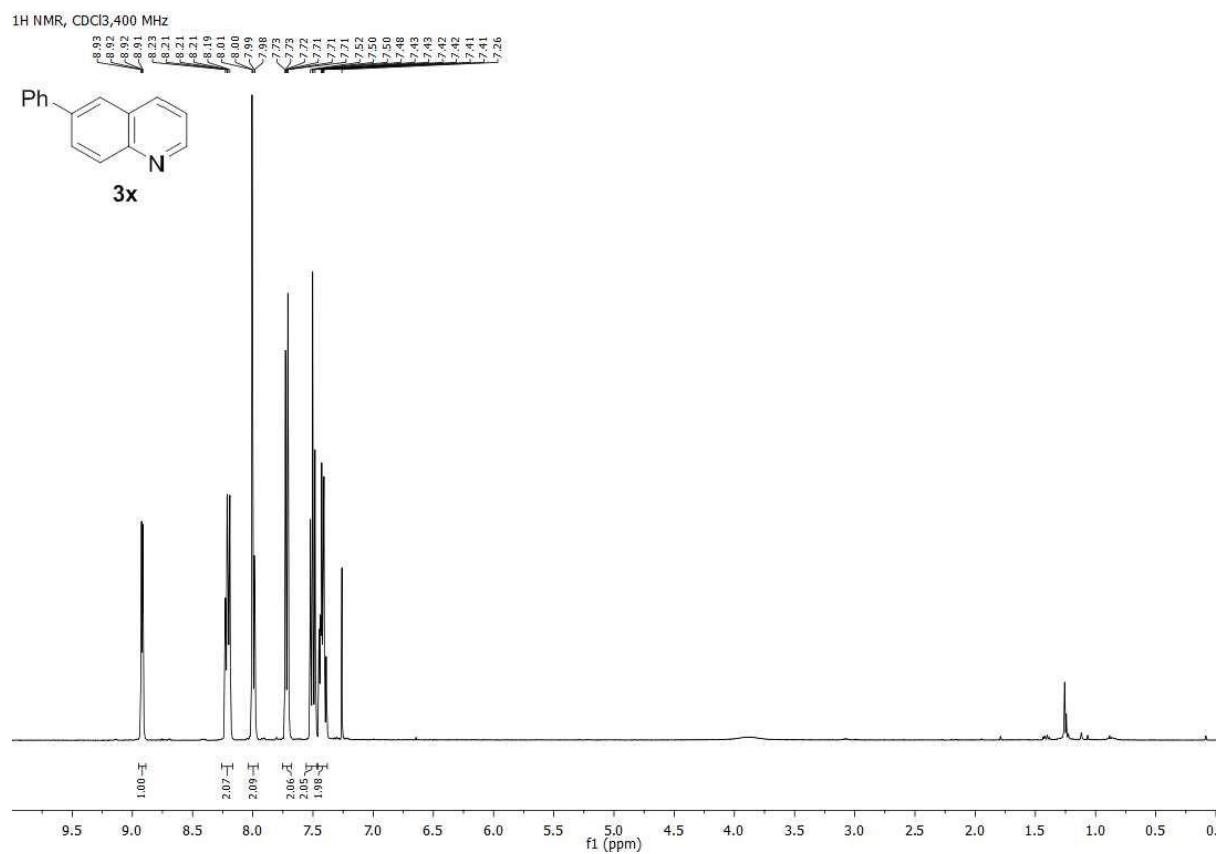

**Figure S47.** <sup>1</sup>H Spectra of **3x**

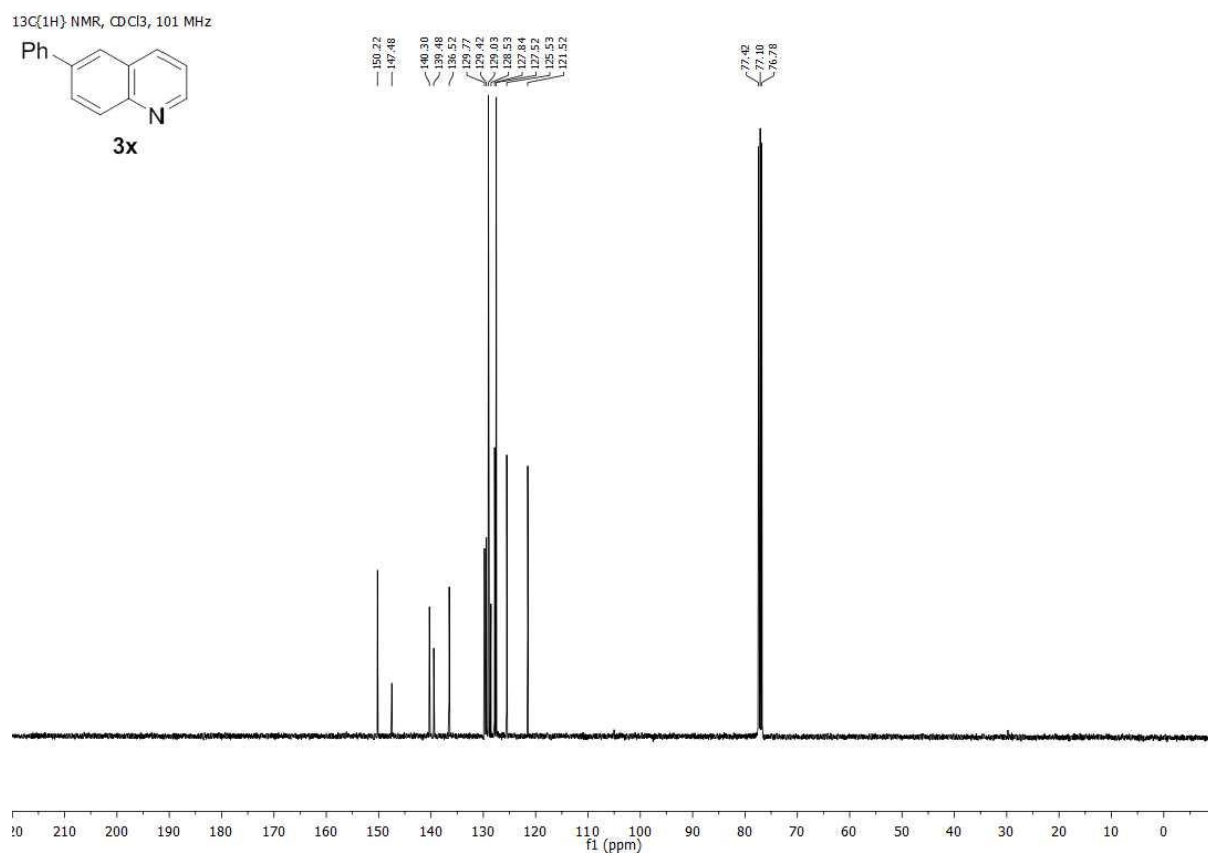

**Figure S48.** <sup>13</sup>C Spectra of **3x**

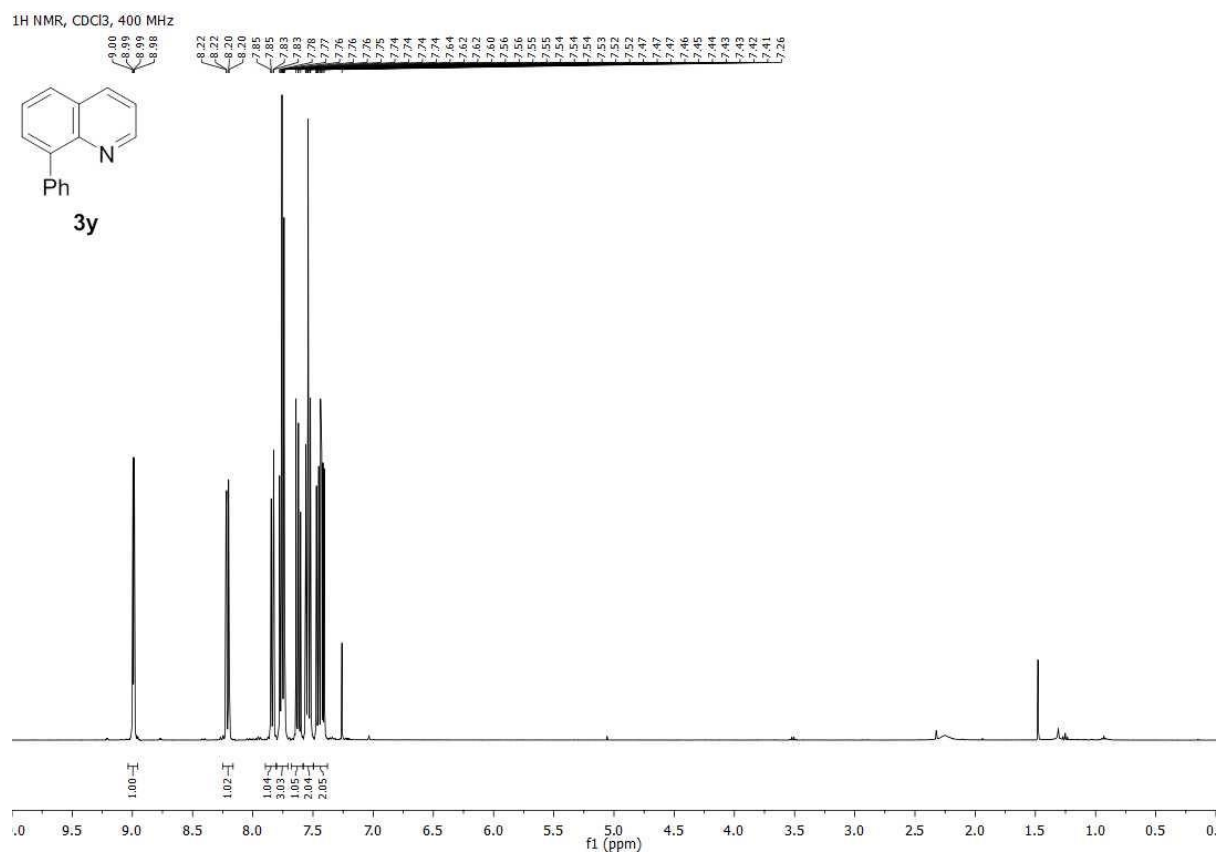

**Figure S49.** <sup>1</sup>H Spectra of **3y**

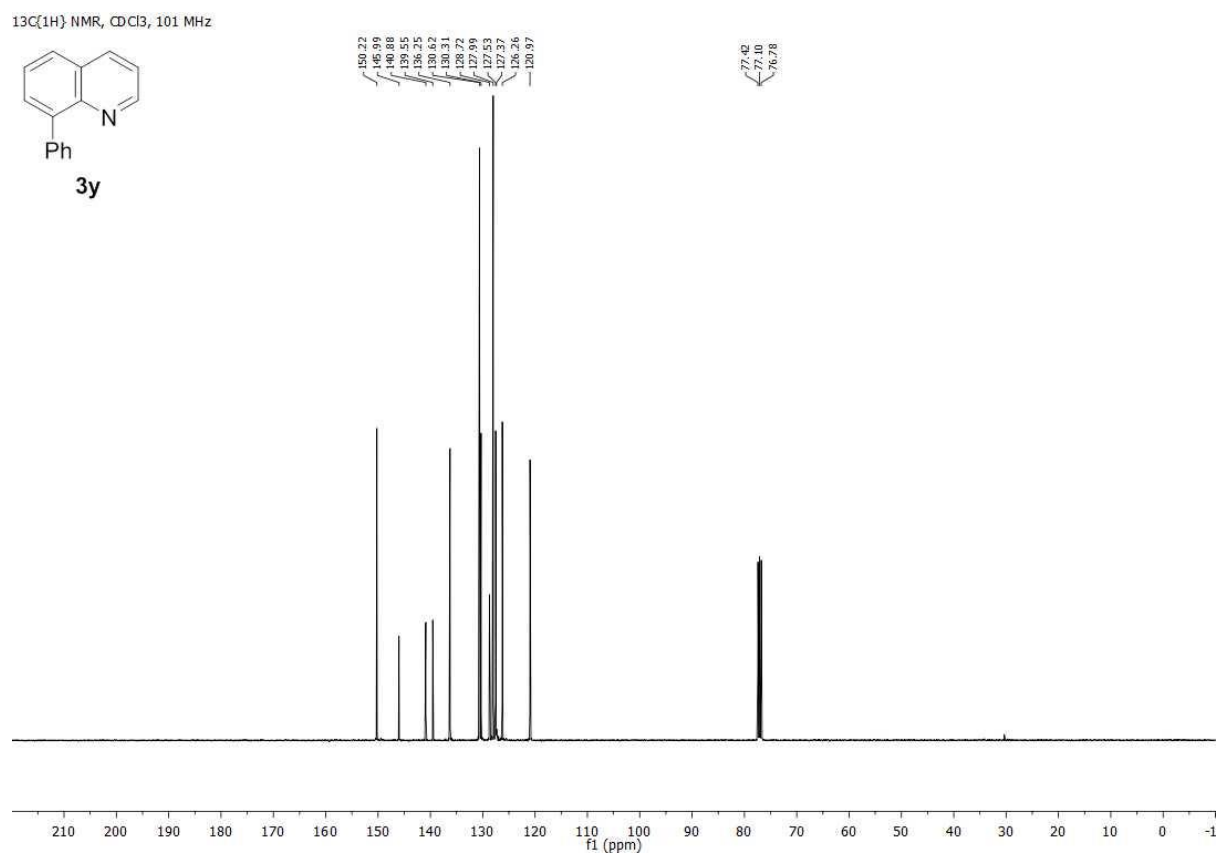

**Figure S50.** <sup>13</sup>C Spectra of **3y**

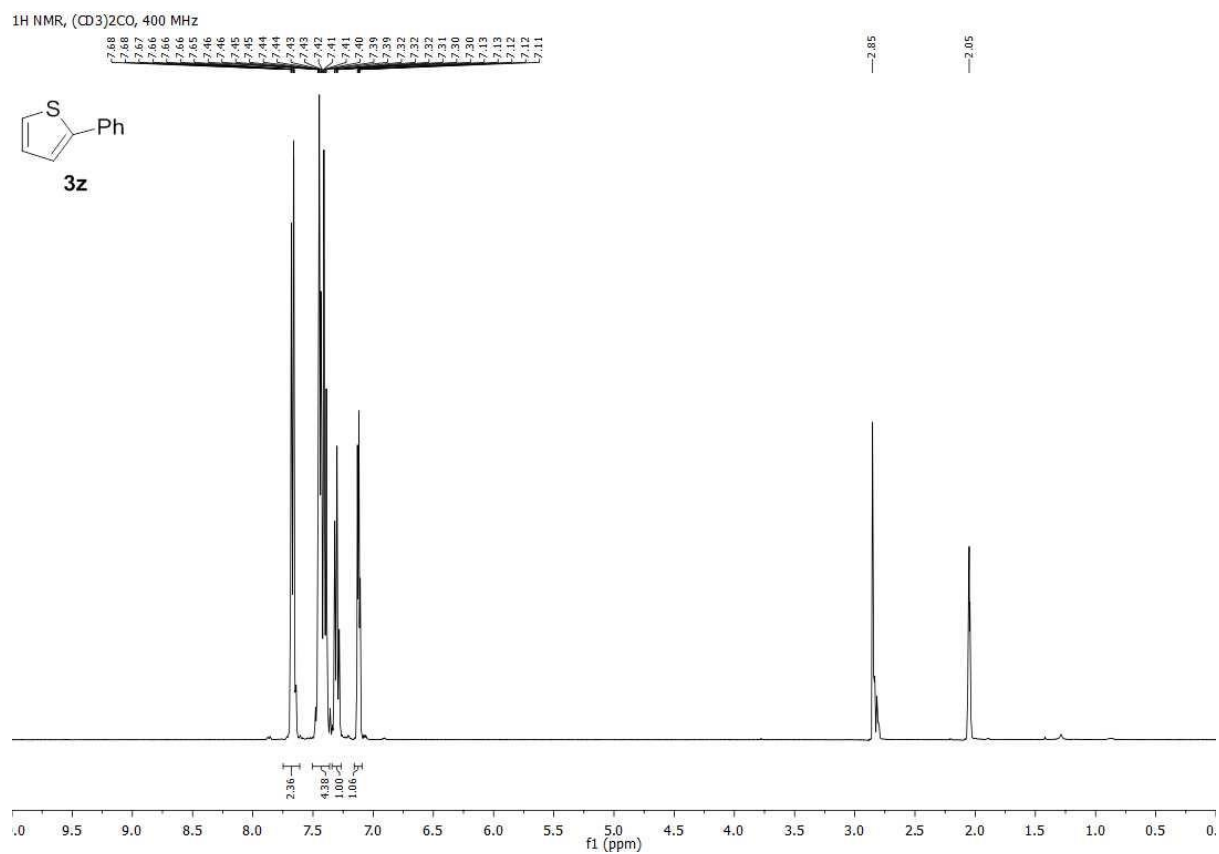

**Figure S51.** <sup>1</sup>H Spectra of **3z**

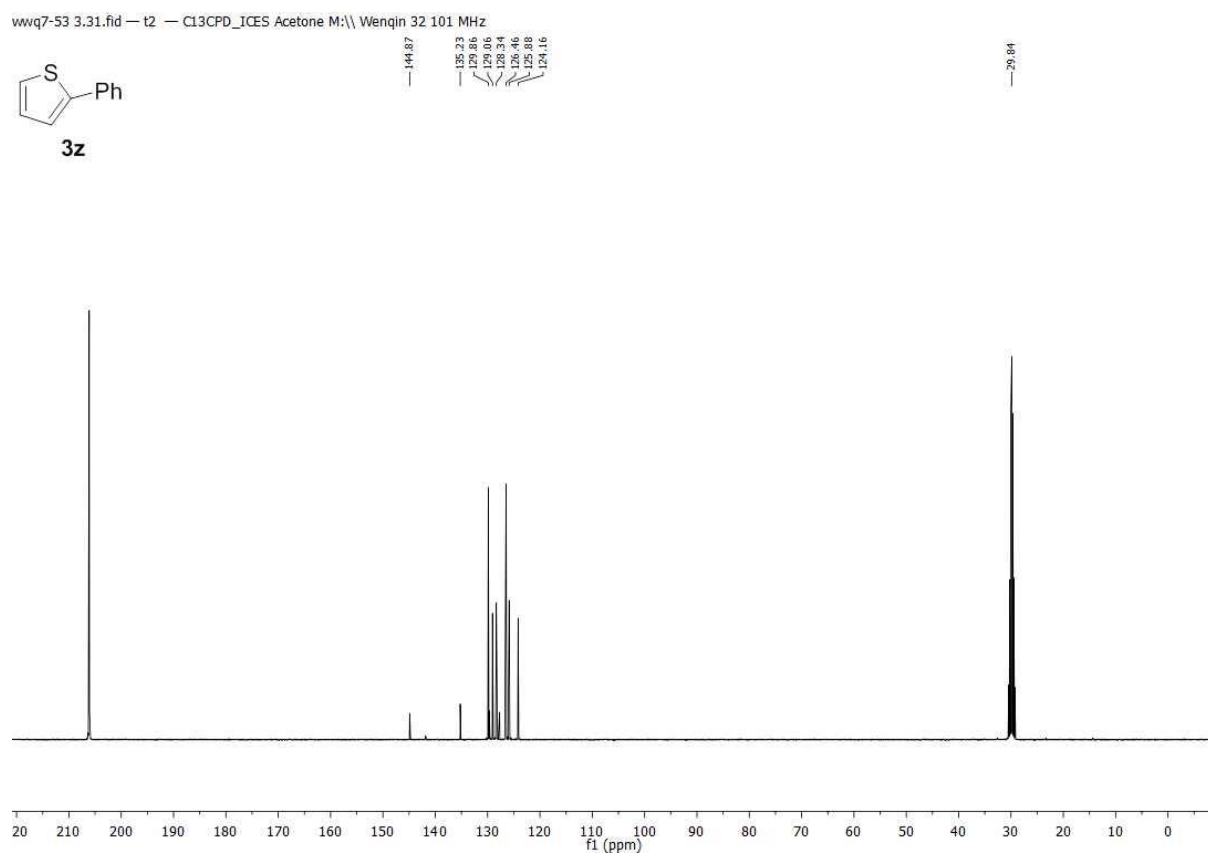

**Figure S52.** <sup>13</sup>C Spectra of **3z**

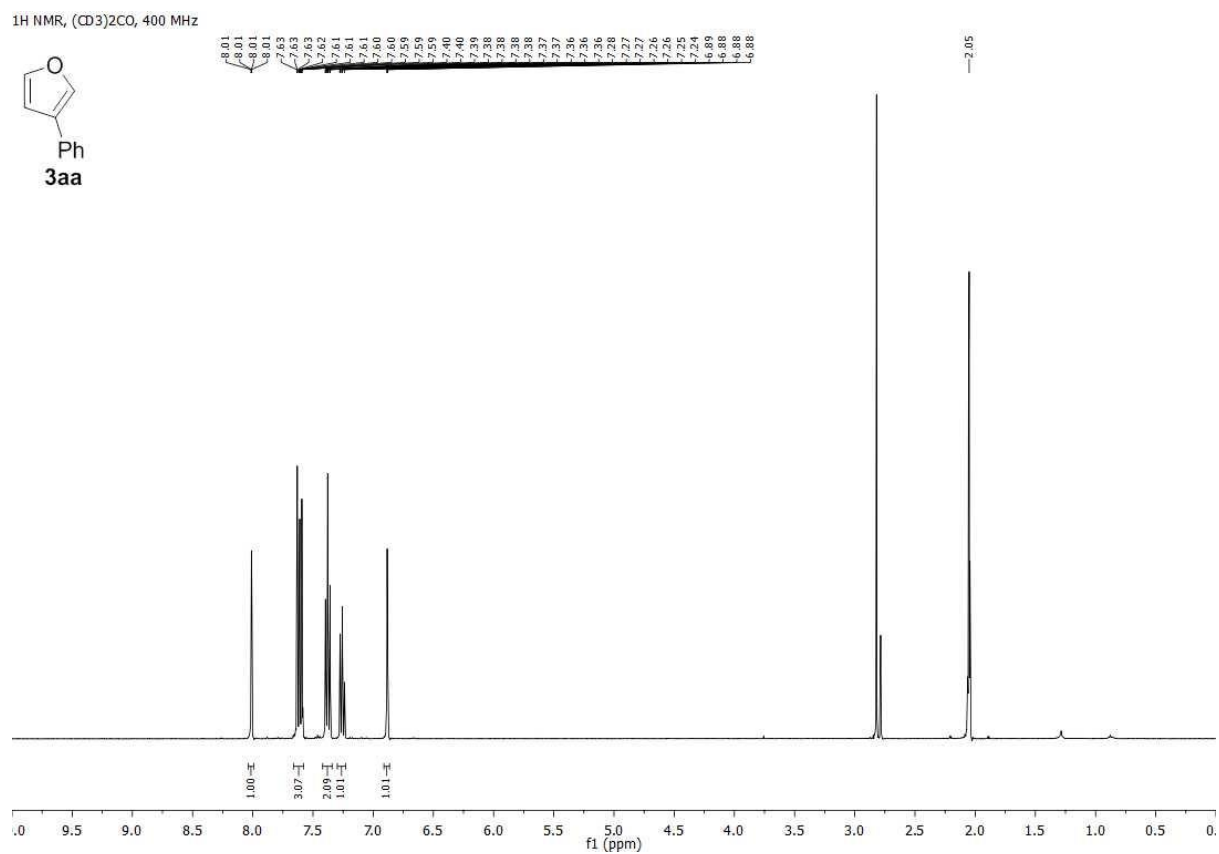

**Figure S53.** <sup>1</sup>H Spectra of 3aa

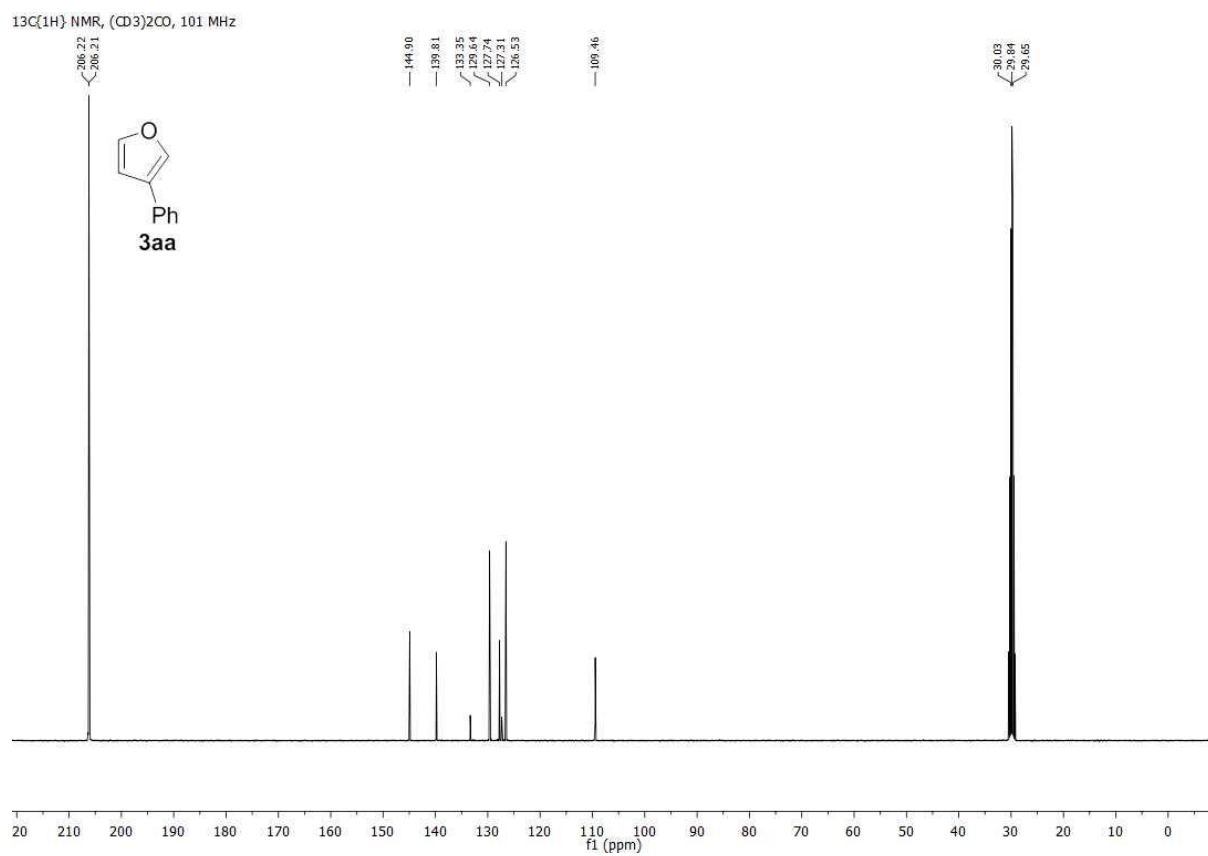

**Figure S54.** <sup>13</sup>C Spectra of 3aa

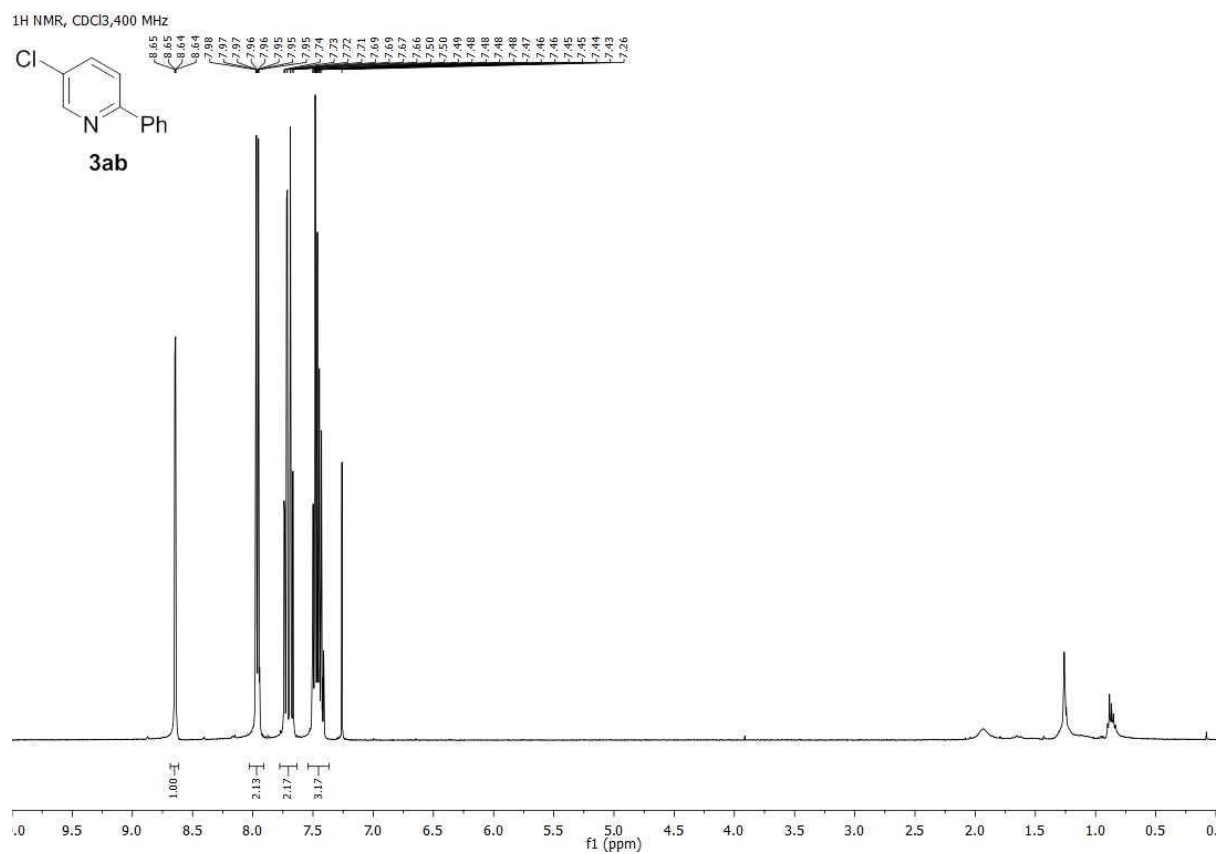

**Figure S55.** <sup>1</sup>H Spectra of **3ab**

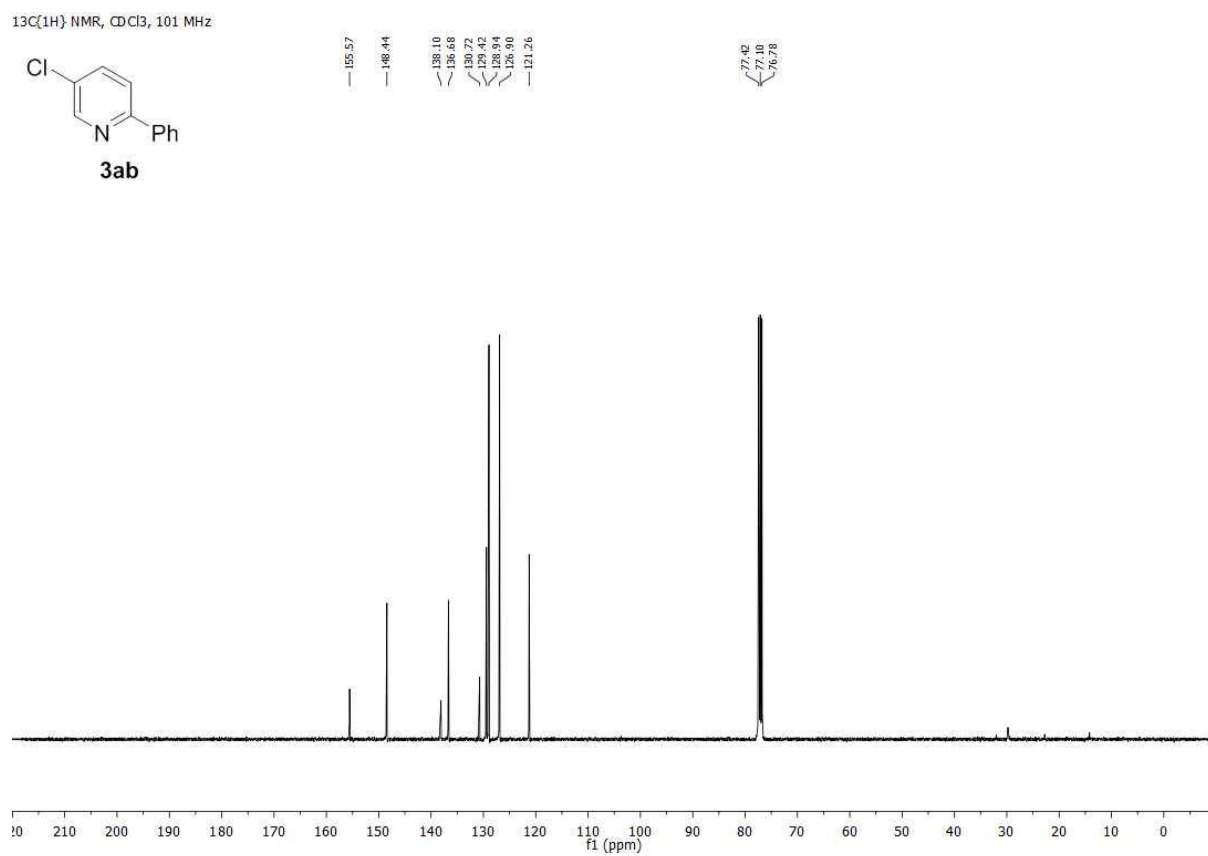

**Figure S56.** <sup>13</sup>C Spectra of **3ab**

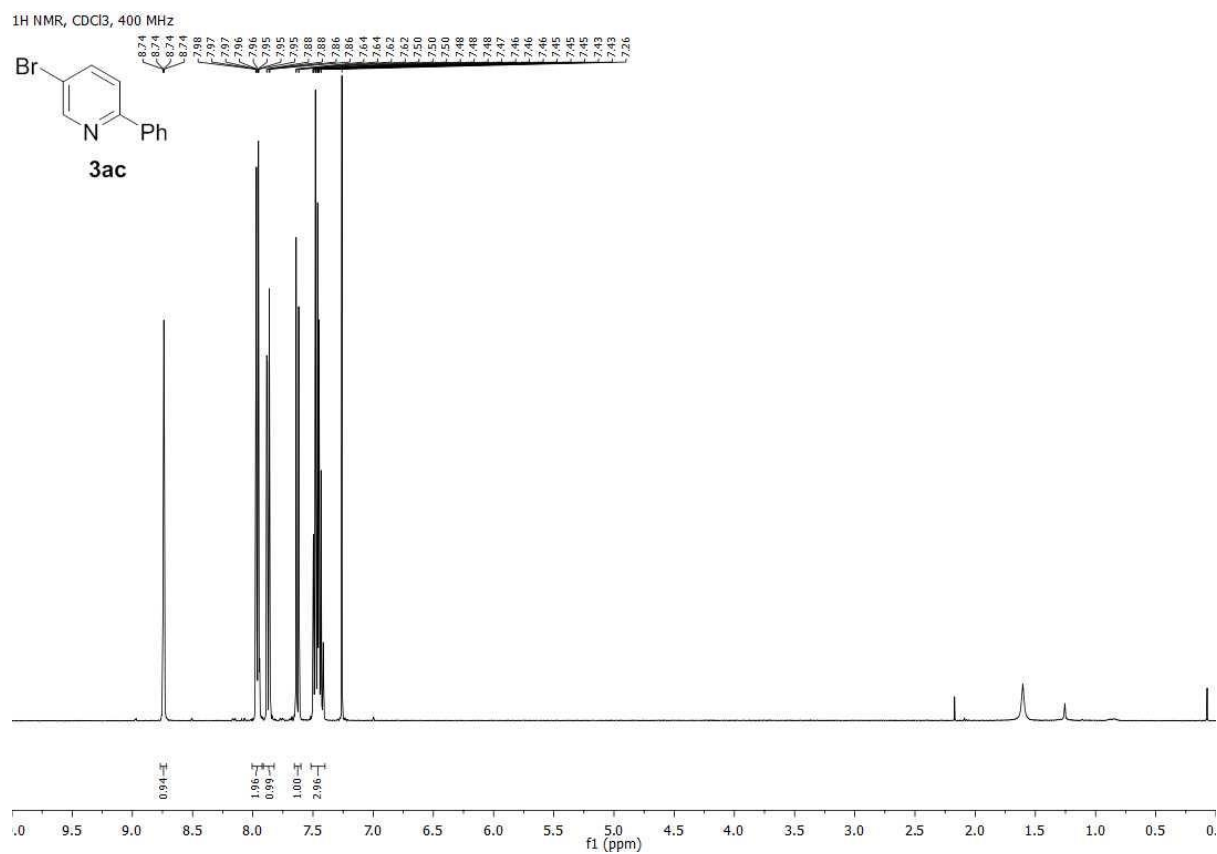

**Figure S57.** <sup>1</sup>H Spectra of **3ac**

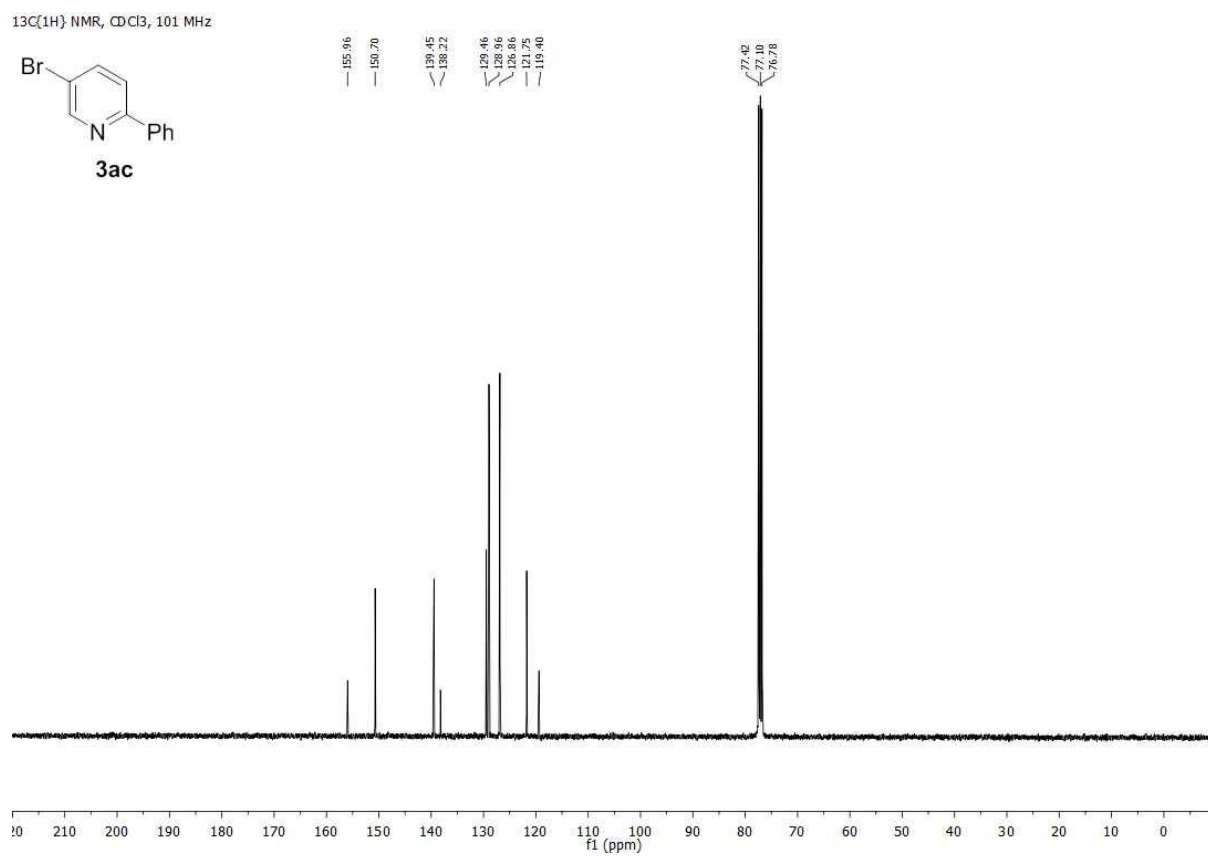

**Figure S58.** <sup>13</sup>C Spectra of **3ac**

<sup>1</sup>H NMR, CDCl<sub>3</sub>, 400 MHz

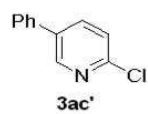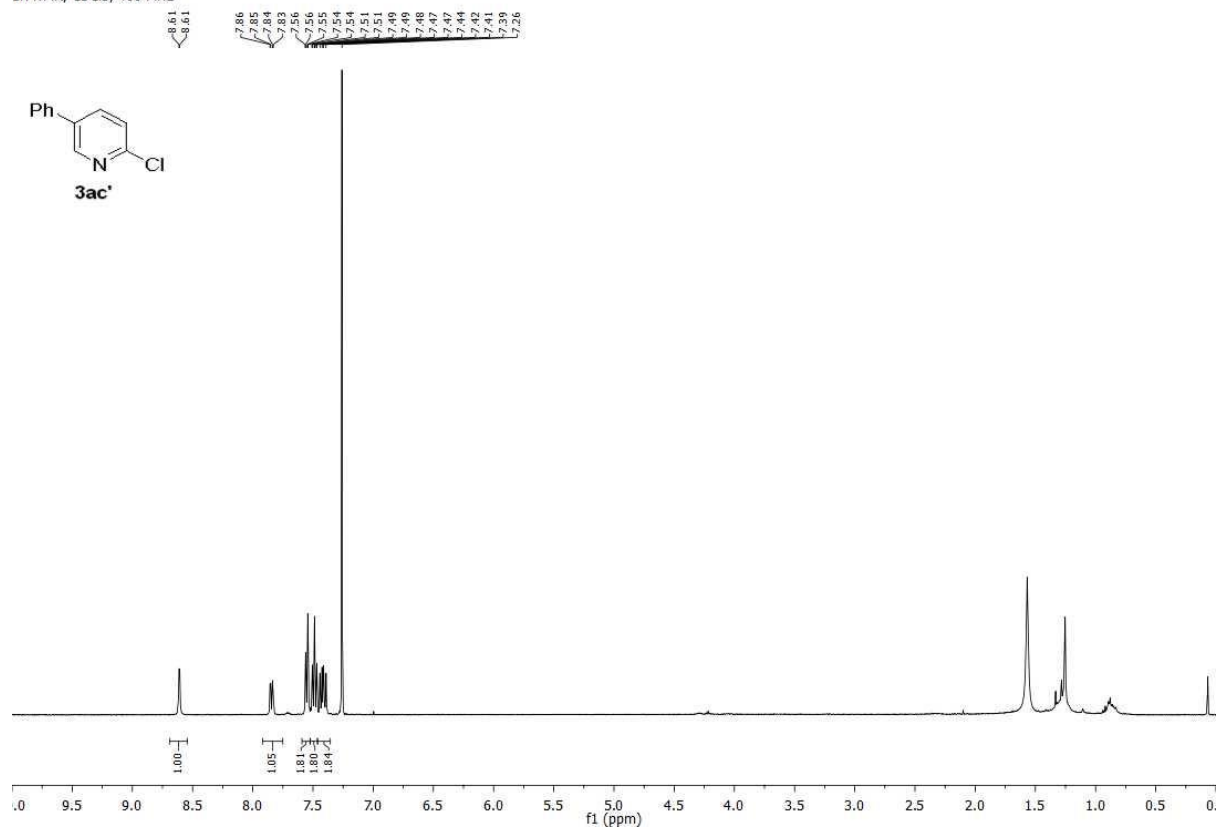

<sup>13</sup>C{<sup>1</sup>H} NMR, CDCl<sub>3</sub>, 101 MHz

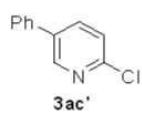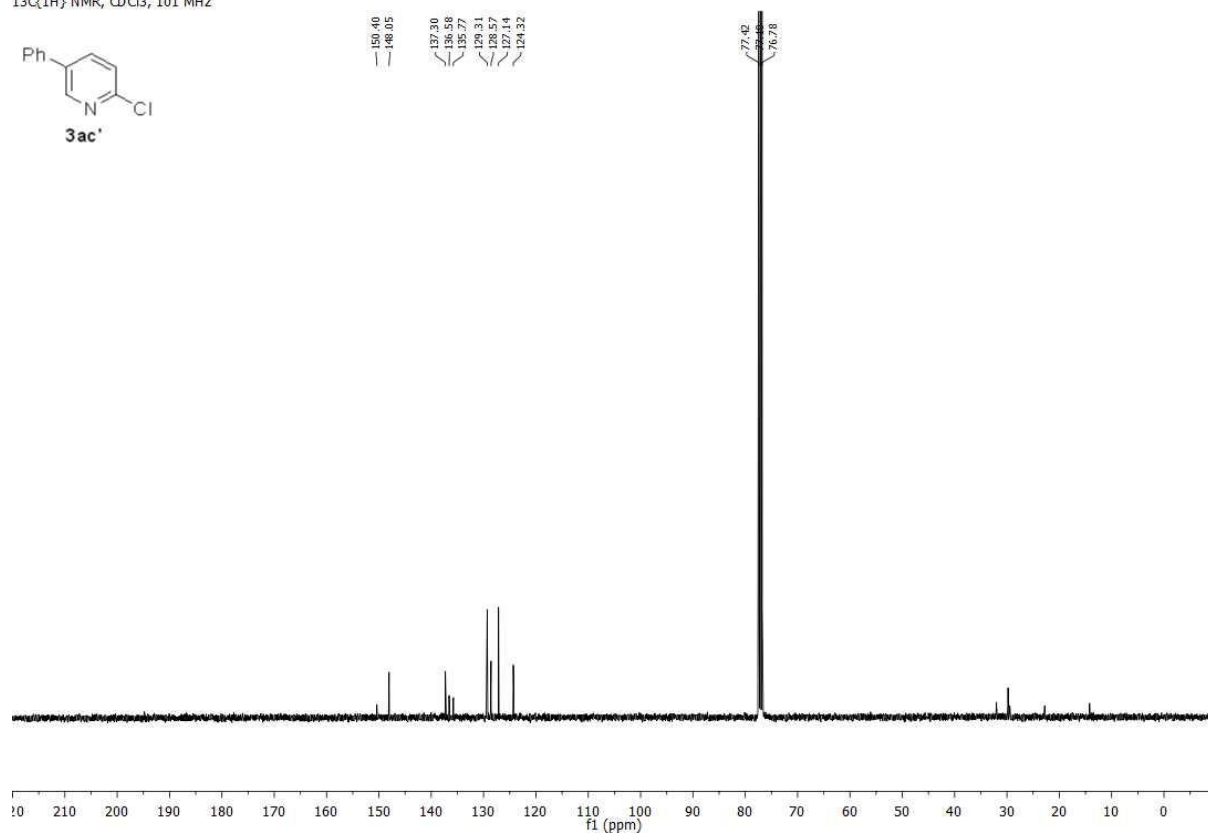



<sup>1</sup>H NMR, CDCl<sub>3</sub>, 400 MHz

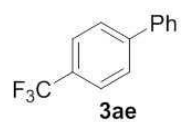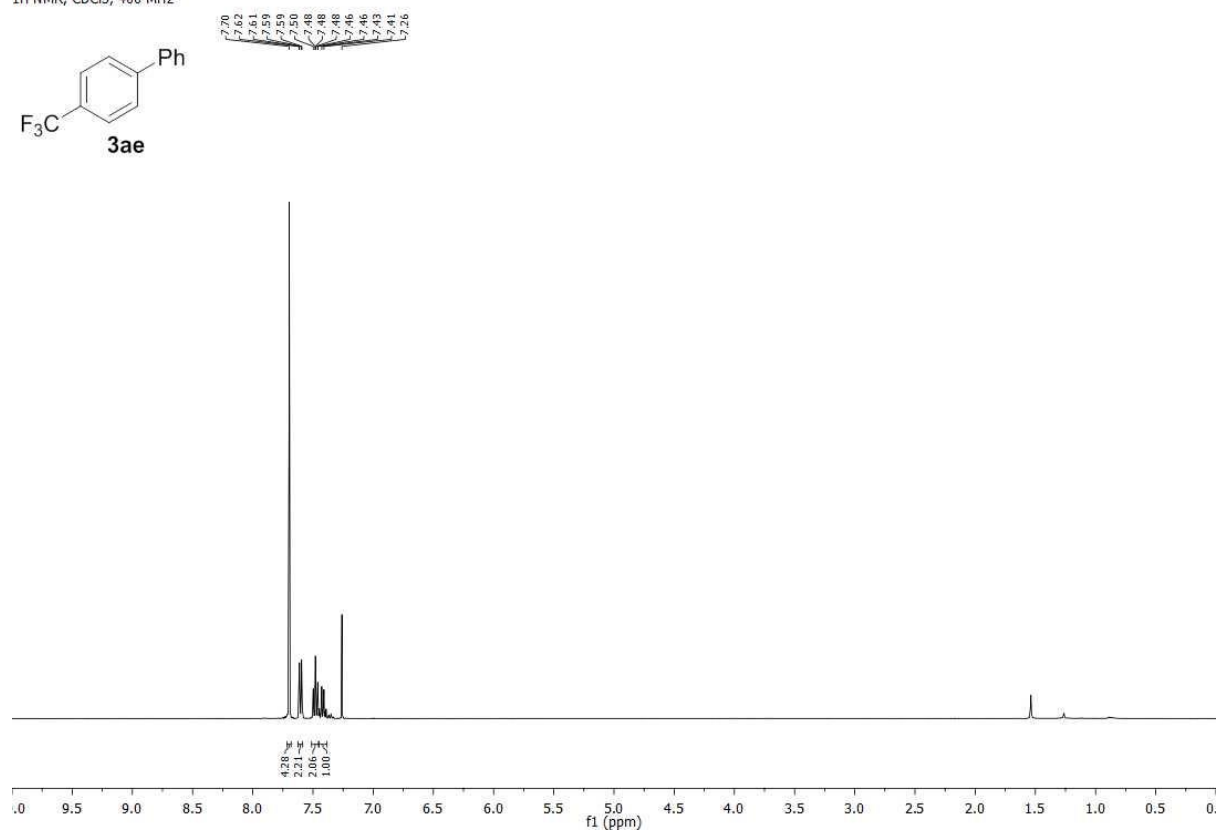

**Figure S59.** <sup>1</sup>H Spectra of **3ae**

wwq7-54 CF3.11.fid — T7-10 — C13CPD\_ICES CDCl<sub>3</sub> M:\ Wenqin 57 101 MHz

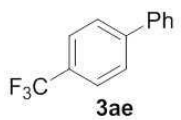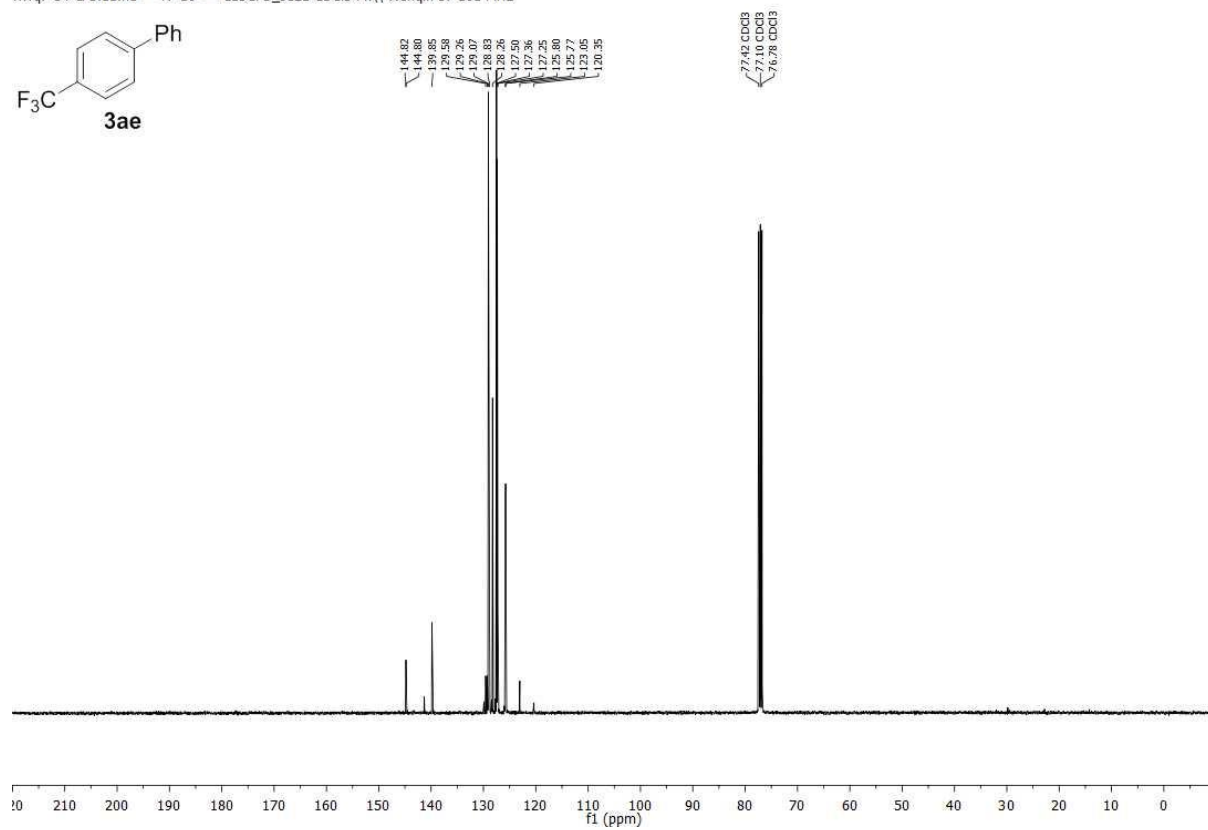

**Figure S60.** <sup>13</sup>C Spectra of **3ae**

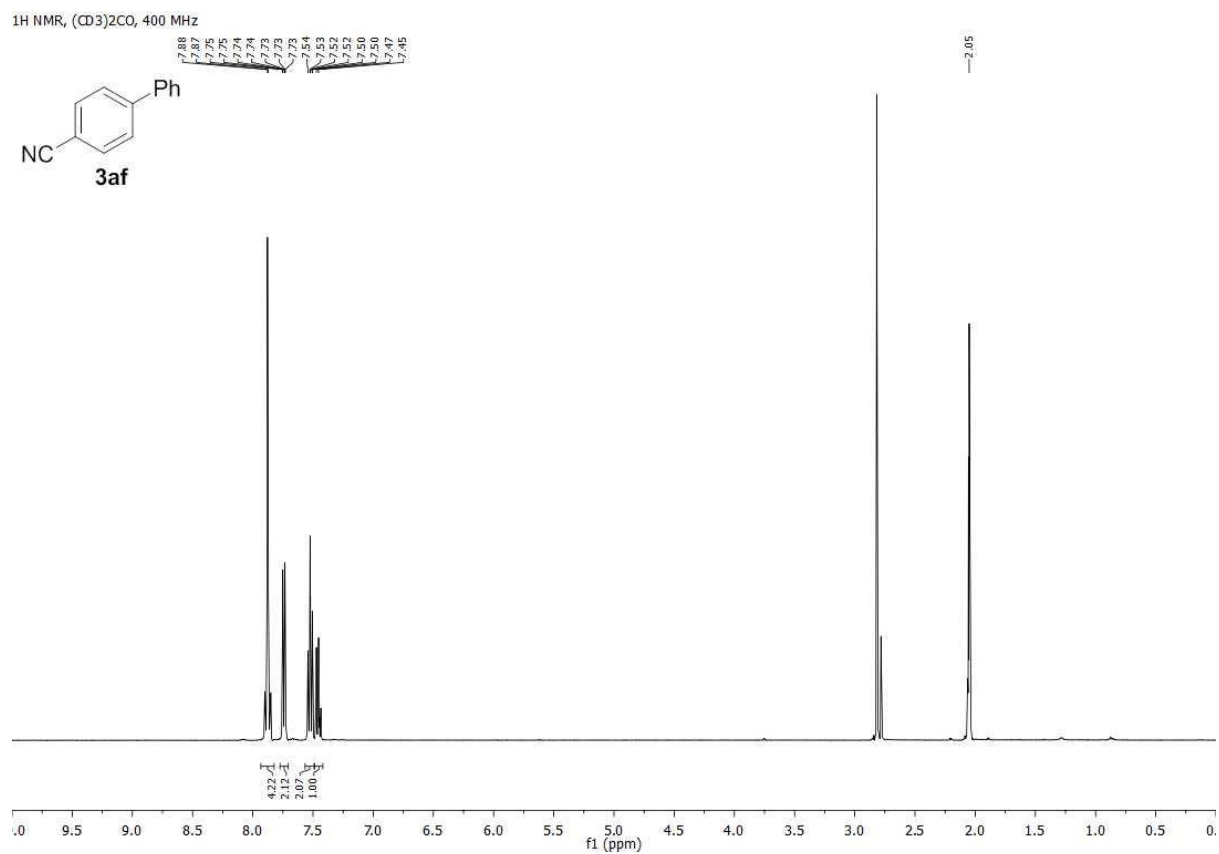

**Figure S61.** <sup>1</sup>H Spectra of **3af**

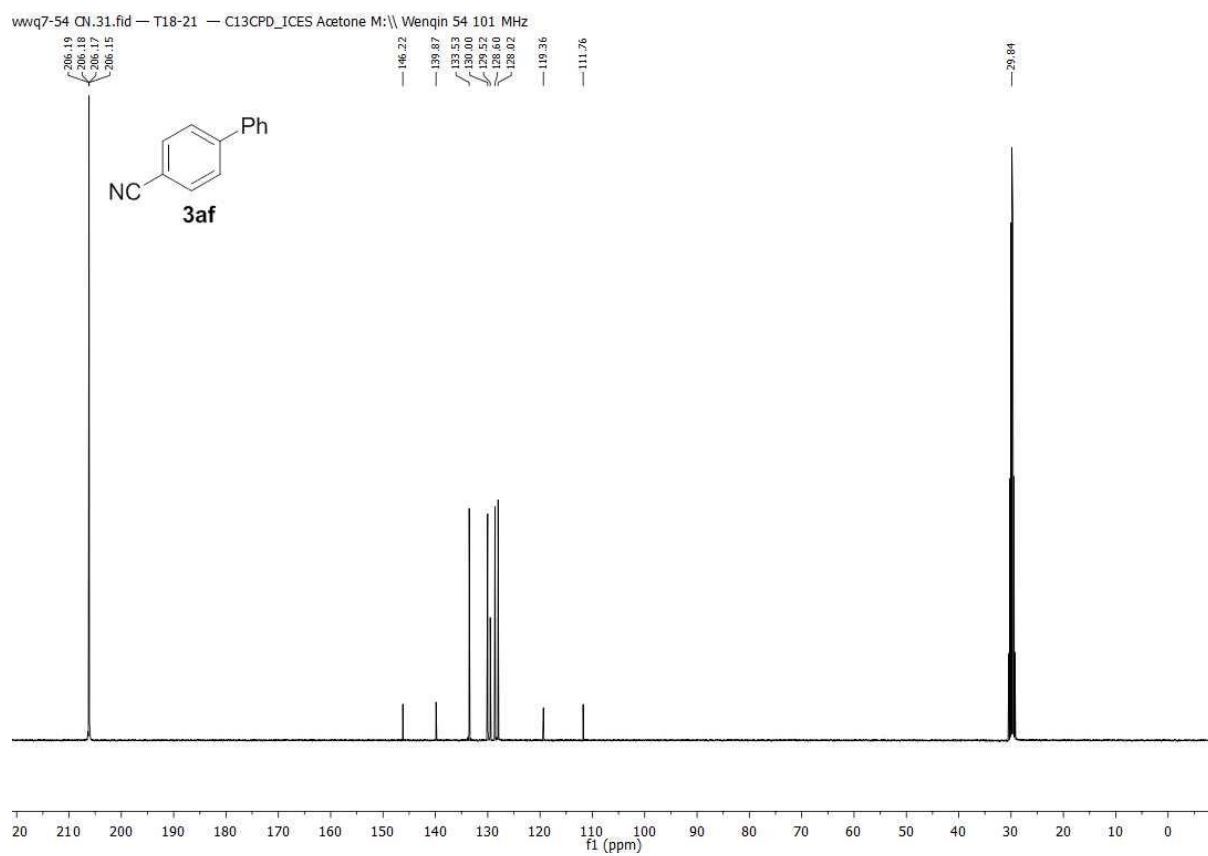

**Figure S62.** <sup>13</sup>C Spectra of **3af**

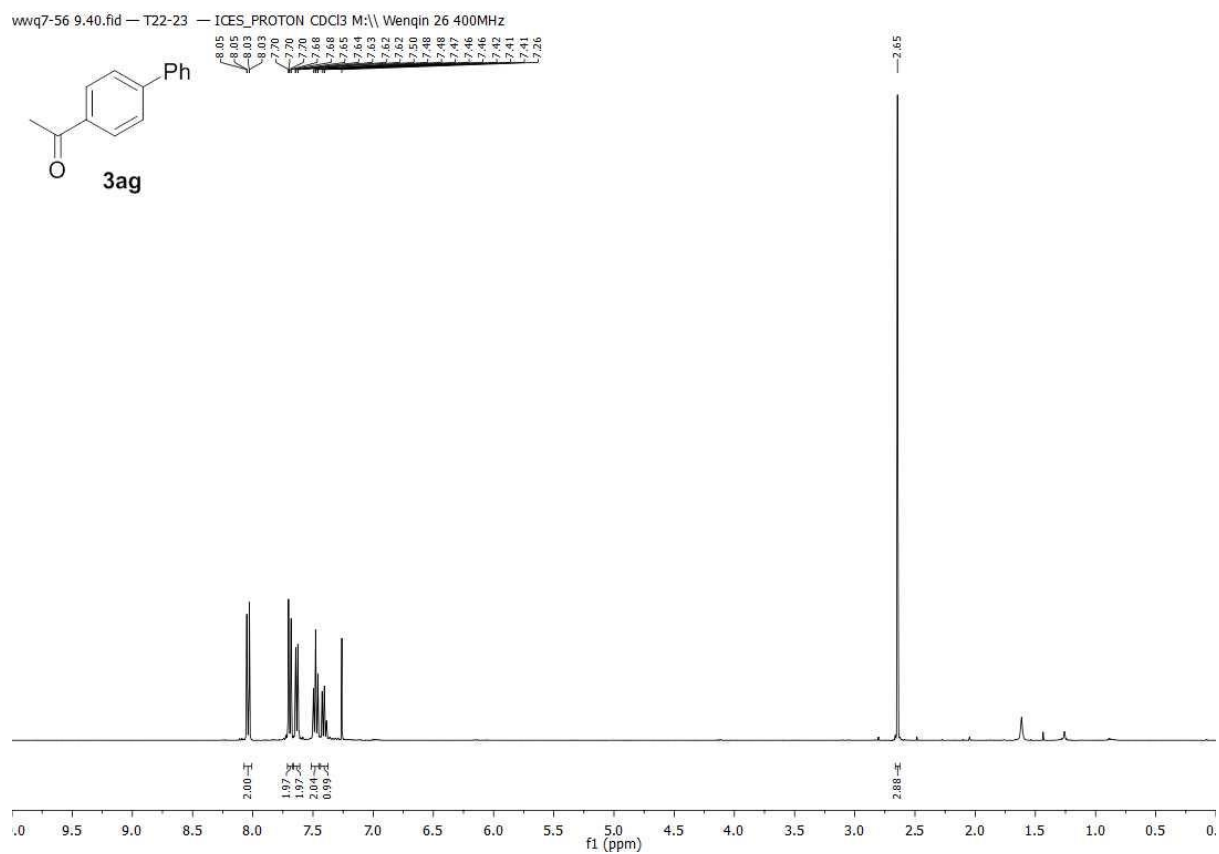

**Figure S63.** <sup>1</sup>H Spectra of **3ag**

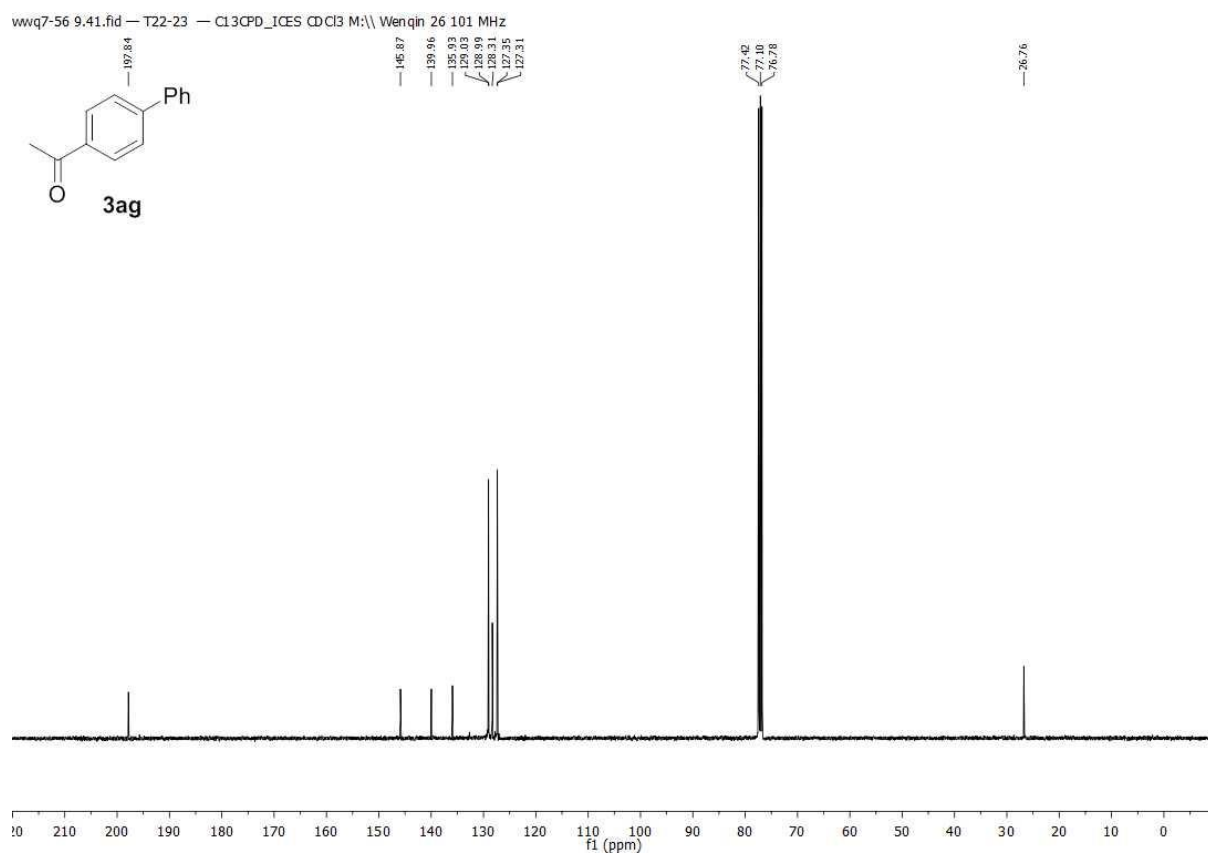

**Figure S64.** <sup>13</sup>C Spectra of **3ag**



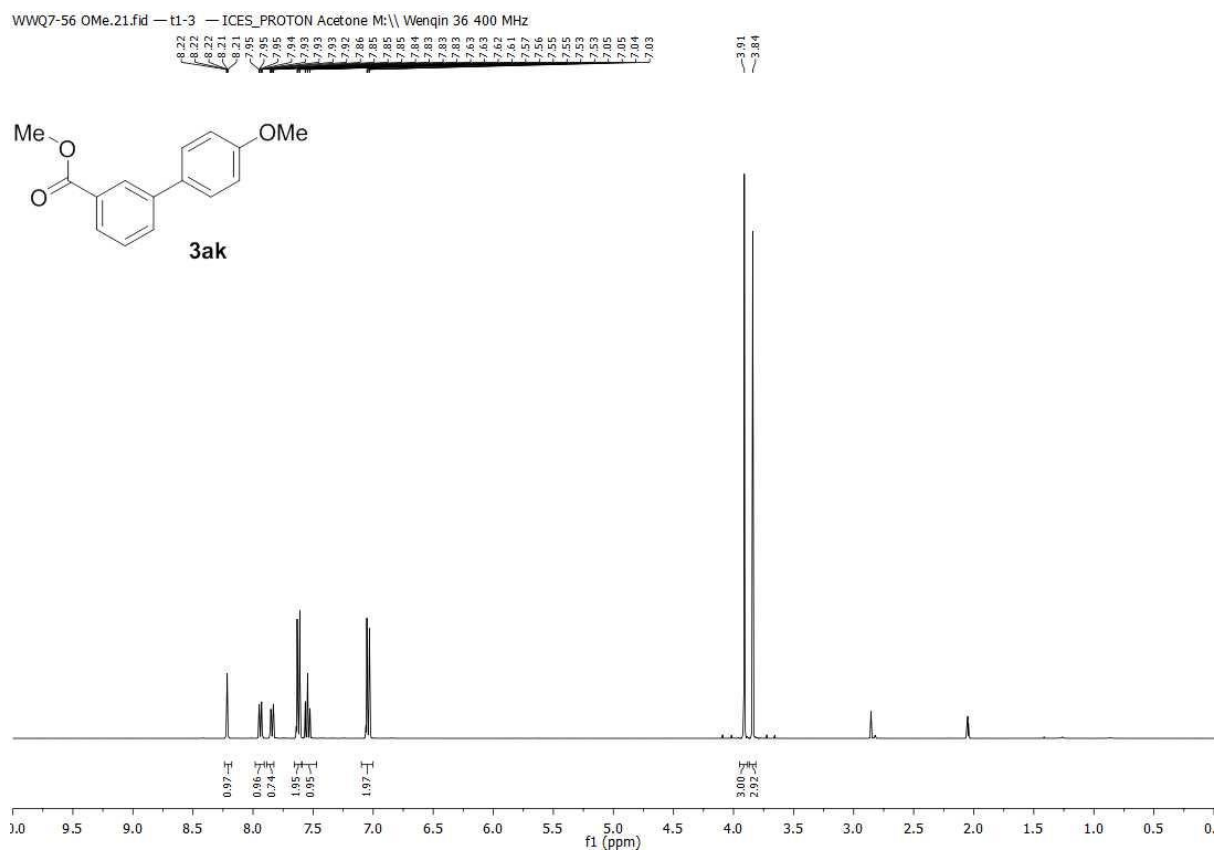

**Figure S67.**  $^1\text{H}$  Spectra of **3ak**

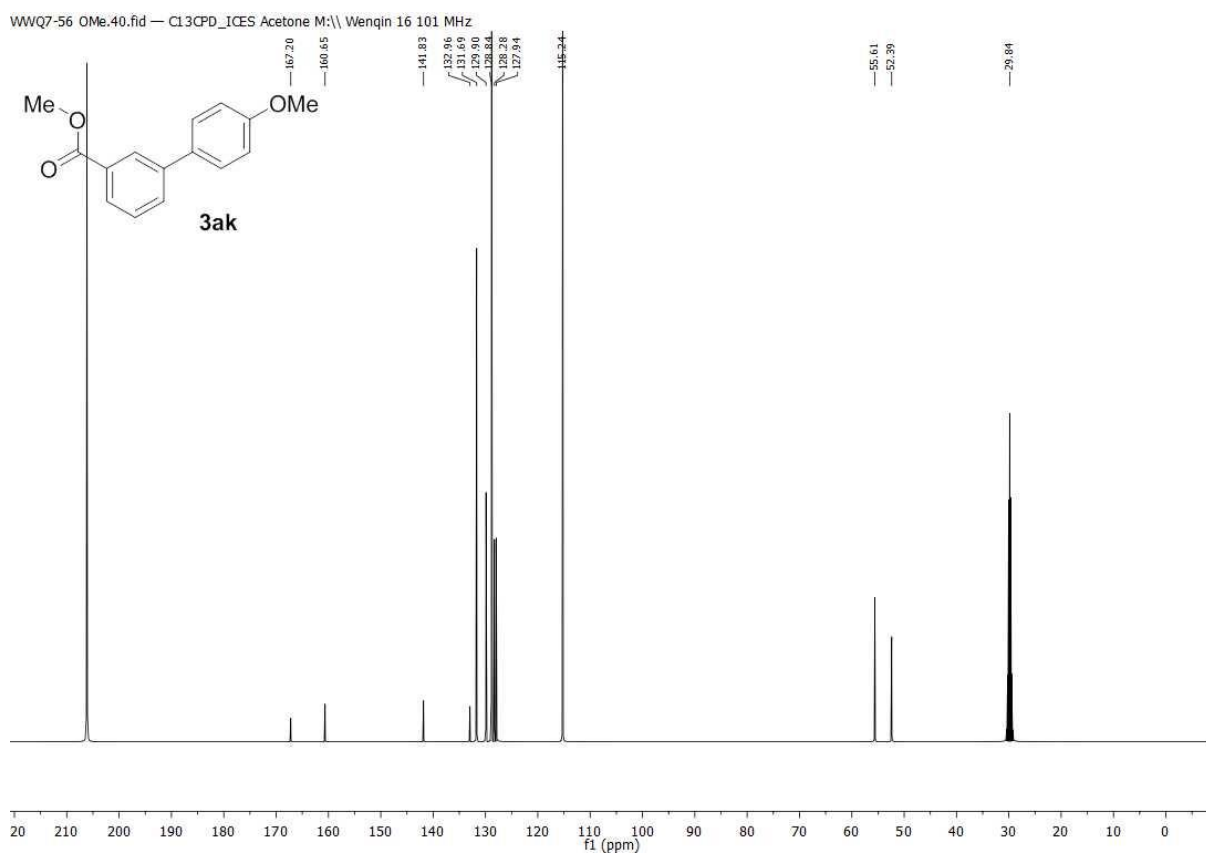

**Figure S68.**  $^{13}\text{C}$  Spectra of **3ak**

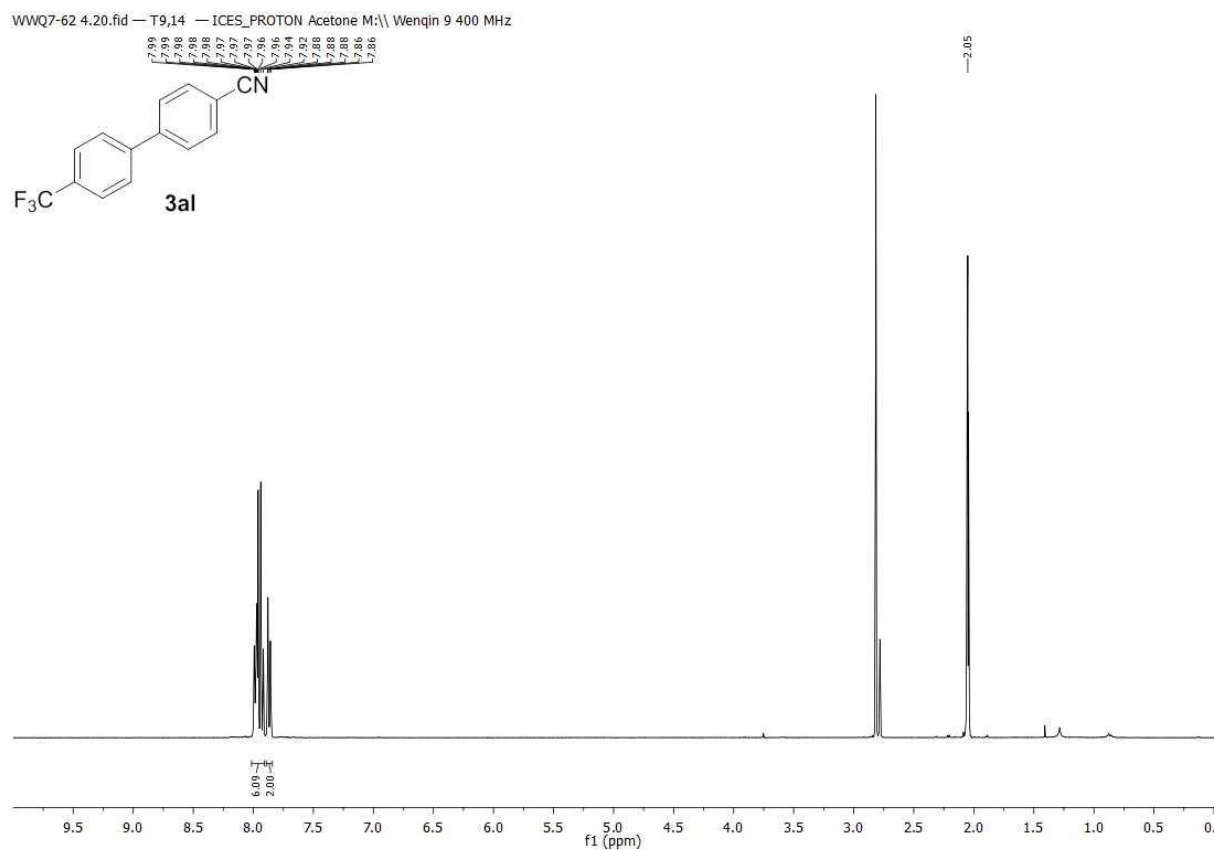

**Figure S69.**  $^1\text{H}$  Spectra of **3al**

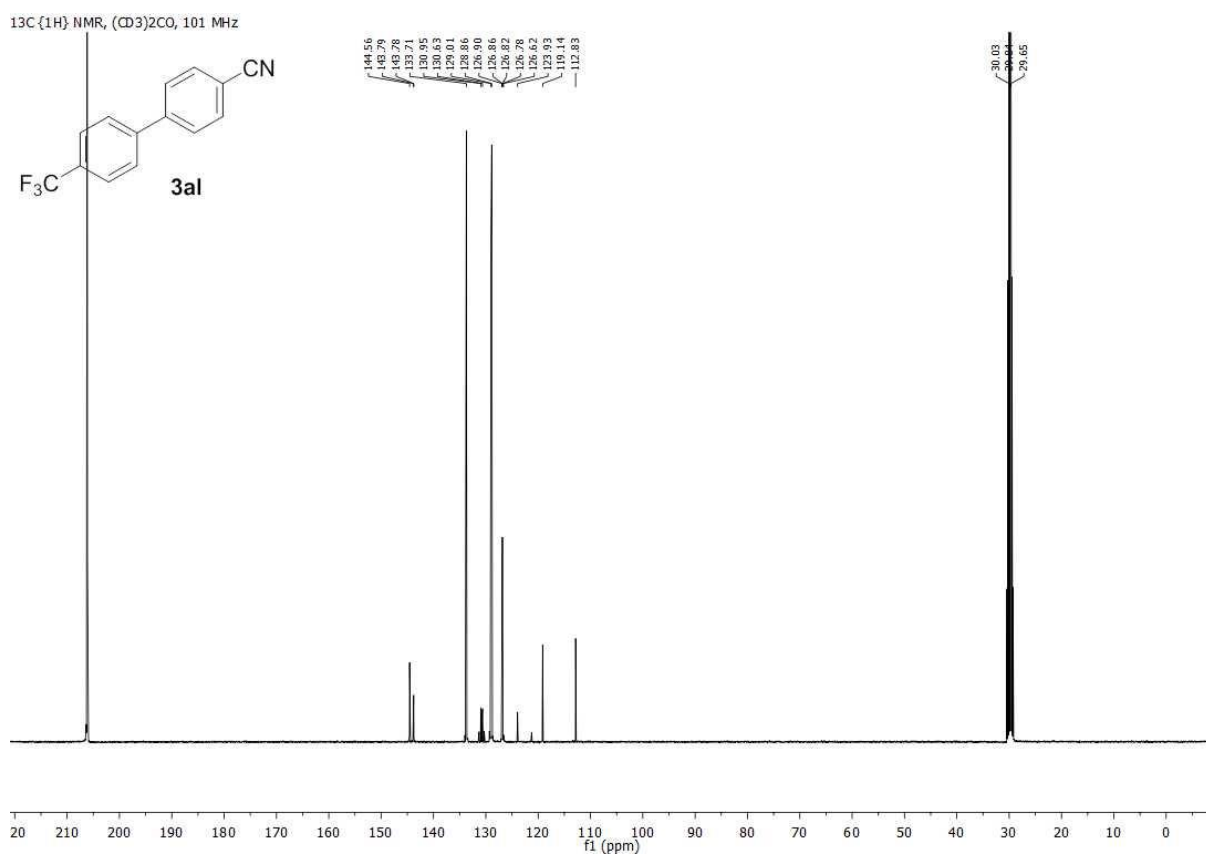

**Figure S70.**  $^{13}\text{C}$  Spectra of **3al**
